# Supplementary material for: Translatome analysis of Tuberous Sclerosis Complex-1 patient-derived neural progenitor cells reveal rapamycin-dependent and independent alterations
Source: Research Square preprint supplement (doi:10.21203/rs.3.rs-2702044/v1), 2023-03-27
Supplement: Supplementary file 1 [file 08937c1a01b7e3bd41391115.xlsx]

## Sheet: Table S2a. Synaptic Genes
Gene Set Description		Gupta et al. Nat Commun. (2014) PMID: 25494366
Cytosolic mRNA log2FC		Changes in cytosolic mRNA levels measured by RNA-sequencing
Polysome-associated mRNA log2FC		Changes in polysome-associated mRNA levels measured by RNA-sequencing
Translation log2FC		Changes in mRNA translation efficiency corrected by changes in total mRNA levels, calculated by anota2seq
	TSC1-/- vs TSC1+/+						ASD vs Control BA19						TSC1-/- + Rapamycin vs TSC1-/-
Gene Symbol	Cytosolic mRNA Log2FC	FDR	Polysome-associated mRNA log2FC	FDR	Translation log2FC	FDR	Cytosolic mRNA Log2FC	p- value	Polysome-associated mRNA log2FC	p-value	Translation log2FC	p-value	Cytosolic mRNA Log2FC	FDR	Polysome-associated mRNA log2FC	FDR	Translation log2FC	FDR
GNB1	0.107428	0.651048	-0.368344	0.358324	-0.368344	0.358324	0.187008	0.257847	-0.219704	0.537953	-0.219704	0.537953	-0.173077	0.972727	0.282987	0.580424	0.282987	0.580424
ENO1	0.0222581	0.934897	0.764757	0.0541178	0.764757	0.0541178	-0.0370135	0.806447	0.472885	0.219655	0.472885	0.219655	0.171398	0.972727	-0.653669	0.238833	-0.653669	0.238833
STX12	0.799937	0.0263595	-0.594872	0.237366	-0.594872	0.237366	0.148894	0.377348	-0.101233	0.793651	-0.101233	0.793651	-0.373945	0.972727	0.743188	0.292335	0.743188	0.292335
AKR1A1	-0.473293	0.0737797	0.343635	0.351795	0.343635	0.351795	-0.158826	0.412919	0.710403	0.116053	0.710403	0.116053	0.104161	0.980068	-0.728315	0.213217	-0.728315	0.213217
NEGR1	1.06779	0.0996156	0.311242	0.418623	0.311242	0.418623	0.232355	0.365479	-0.0545273	0.895615	-0.0545273	0.895615	0.12548	0.992554	-0.546206	0.307925	-0.546206	0.307925
ATP1A1	1.19555	0.00298263	1.35153	0.00427266	1.35153	0.00427266	0.182463	0.401972	0.689431	0.143835	0.689431	0.143835	-0.350187	0.972727	-0.455617	0.355962	-0.455617	0.355962
SV2A	0.870036	0.0108484	0.750489	0.0544622	0.750489	0.0544622	0.403546	0.0512107	0.492566	0.219884	0.492566	0.219884	-0.142174	0.972727	-0.179205	0.701412	-0.179205	0.701412
ATP1A2	3.89625	0.000628376	3.7361	2.41325e-05	3.7361	2.41325e-05	-0.671547	0.0222847	-0.694093	0.182083	-0.694093	0.182083	-0.888564	0.972727	-0.574107	0.342616	-0.574107	0.342616
ATP1B1	1.52846	0.00254235	0.377374	0.349646	0.377374	0.349646	0.107389	0.554559	0.35649	0.398973	0.35649	0.398973	-0.0788483	0.992554	0.311692	0.545297	0.311692	0.545297
DNM3	1.05777	0.117999	-0.418007	0.399626	-0.418007	0.399626	0.343857	0.126646	-0.294094	0.467329	-0.294094	0.467329	-0.185969	0.992554	1.24005	0.170981	1.24005	0.170981
PRDX6	0.306034	0.213004	0.702088	0.0808296	0.702088	0.0808296	-0.510765	0.0203194	0.318569	0.473575	0.318569	0.473575	0.0575351	0.992554	-0.52287	0.323966	-0.52287	0.323966
GLUL	-0.337854	0.1597	-0.216989	0.566858	-0.216989	0.566858	-0.632147	0.0633139	-0.127923	0.767282	-0.127923	0.767282	-0.147071	0.972727	-0.365328	0.45242	-0.365328	0.45242
SYT2	-1.92025	0.000763599	-2.38172	0.000150703	-2.38172	0.000150703	0.449696	0.328472	0.67451	0.388294	0.67451	0.388294	0.0322325	0.992557	0.485002	0.335161	0.485002	0.335161
ATP2B4	1.15018	0.00859253	-0.12927	0.800271	-0.12927	0.800271	0.0505757	0.816625	-0.219348	0.510408	-0.219348	0.510408	-0.408989	0.972727	0.704137	0.299411	0.704137	0.299411
PFKP	1.37212	0.00274595	1.80377	0.000892817	1.80377	0.000892817	0.500701	0.0193306	0.431419	0.325428	0.431419	0.325428	-0.153733	0.972727	-0.559788	0.283662	-0.559788	0.283662
ATP5C1	0.156543	0.542434	-0.206689	0.576096	-0.206689	0.576096	0.0823808	0.698329	0.101545	0.801475	0.101545	0.801475	0.0843533	0.992179	-0.201417	0.666121	-0.201417	0.666121
HK1	1.07938	0.00571841	1.52207	0.00222824	1.52207	0.00222824	0.248005	0.215672	0.436374	0.314054	0.436374	0.314054	-0.456165	0.972727	-0.760476	0.202001	-0.760476	0.202001
CAMK2G	0.176522	0.478325	0.524232	0.152214	0.524232	0.152214	0.324785	0.134009	0.212747	0.55704	0.212747	0.55704	-0.0439491	0.992557	-0.213891	0.641522	-0.213891	0.641522
VDAC2	0.532033	0.0503534	0.620161	0.13793	0.620161	0.13793	0.144885	0.498116	0.122349	0.788838	0.122349	0.788838	-0.1802	0.972727	-0.325333	0.532614	-0.325333	0.532614
PGAM1	0.321725	0.217862	0.70373	0.073648	0.70373	0.073648	0.43391	0.0856646	1.01012	0.0446317	1.01012	0.0446317	0.0968496	0.987552	-0.519109	0.316971	-0.519109	0.316971
DPYSL4	-2.42668	0.000641895	-1.65816	0.00170106	-1.65816	0.00170106	-0.0328177	0.912896	0.521499	0.281209	0.521499	0.281209	0.466804	0.972727	-0.265602	0.581757	-0.265602	0.581757
AP2A2	0.162568	0.506355	0.48726	0.195342	0.48726	0.195342	0.421259	0.23871	-0.215277	0.606225	-0.215277	0.606225	-0.00315667	0.998899	-0.419009	0.393799	-0.419009	0.393799
LDHA	-0.970172	0.0120789	-1.40308	0.0199774	-1.40308	0.0199774	0.481603	0.0466444	0.67894	0.178151	0.67894	0.178151	0.0411497	0.992557	0.266471	0.693318	0.266471	0.693318
SLC1A2	-2.55885	0.00276553	-3.81842	4.74681e-05	-3.81842	4.74681e-05	-0.418093	0.275861	-0.717126	0.226651	-0.717126	0.226651	-0.819868	0.972727	1.08622	0.19674	1.08622	0.19674
SYT7	-0.736377	0.0263595	-0.593945	0.230221	-0.593945	0.230221	0.267398	0.184358	0.769318	0.133098	0.769318	0.133098	-0.00126317	0.999144	0.101708	0.874115	0.101708	0.874115
CFL1	-0.326005	0.257205	0.225352	0.585336	0.225352	0.585336	0.213915	0.303003	0.820485	0.0842958	0.820485	0.0842958	0.31489	0.972727	-0.578201	0.308568	-0.578201	0.308568
DLG2	1.46284	0.0141432	1.23968	0.0122249	1.23968	0.0122249	0.0499845	0.778399	-0.395554	0.297889	-0.395554	0.297889	0.490291	0.972727	1.25124	0.150542	1.25124	0.150542
ACAT1	0.379385	0.215794	-0.735537	0.161218	-0.735537	0.161218	0.126014	0.531158	-0.0400089	0.909315	-0.0400089	0.909315	-0.0926611	0.992554	0.471469	0.478334	0.471469	0.478334
DLAT	0.190032	0.459299	-0.63816	0.209907	-0.63816	0.209907	-0.100558	0.628388	-0.284657	0.523281	-0.284657	0.523281	-0.153265	0.972727	0.654102	0.341056	0.654102	0.341056
NCAM1	-0.114085	0.72542	-1.03991	0.03504	-1.03991	0.03504	0.185098	0.224315	0.179439	0.637464	0.179439	0.637464	-0.191669	0.972727	0.688109	0.280989	0.688109	0.280989
THY1	2.52746	0.000287212	3.36642	6.52302e-05	3.36642	6.52302e-05	0.225744	0.287419	0.790852	0.0925251	0.790852	0.0925251	-0.626226	0.972727	-1.21148	0.165445	-1.21148	0.165445
OPCML	1.34054	0.0031444	0.532662	0.20578	0.532662	0.20578	0.388706	0.0943166	-0.116055	0.764508	-0.116055	0.764508	-0.0558278	0.992554	0.493183	0.374369	0.493183	0.374369
GAPDH	-0.578522	0.0592686	0.418907	0.256294	0.418907	0.256294	0.216605	0.477108	0.709227	0.148566	0.709227	0.148566	0.37577	0.972727	-0.894913	0.175218	-0.894913	0.175218
TPI1	0.0281429	0.926761	0.744027	0.083356	0.744027	0.083356	0.16469	0.402371	0.887697	0.0678379	0.887697	0.0678379	0.238407	0.972727	-0.729278	0.236565	-0.729278	0.236565
ENO2	2.33746	0.000284085	3.2343	1.71081e-05	3.2343	1.71081e-05	0.480063	0.111649	0.471721	0.357534	0.471721	0.357534	-0.330032	0.972727	-1.2572	0.134655	-1.2572	0.134655
LDHB	0.088077	0.804135	-0.882297	0.125588	-0.882297	0.125588	0.0988685	0.630125	0.241975	0.514809	0.241975	0.514809	-0.0305603	0.994813	0.219051	0.763606	0.219051	0.763606
PFKM	-0.184695	0.403106	-0.128186	0.762057	-0.128186	0.762057	0.0998845	0.594447	0.283001	0.501937	0.283001	0.501937	-0.237543	0.972727	-0.2139	0.677492	-0.2139	0.677492
TUBA1A	0.369289	0.138184	1.18812	0.00765615	1.18812	0.00765615	0.380516	0.202595	0.569486	0.154141	0.569486	0.154141	0.0892799	0.987552	-0.754193	0.202001	-0.754193	0.202001
ATP5B	-0.137609	0.550347	0.53111	0.15039	0.53111	0.15039	0.288855	0.203101	-0.0523833	0.907519	-0.0523833	0.907519	0.134492	0.972727	-0.54624	0.28611	-0.54624	0.28611
SYT1	1.33917	0.0123972	-0.192168	0.67173	-0.192168	0.67173	0.752636	0.016972	0.425002	0.329539	0.425002	0.329539	-0.260888	0.972727	0.671545	0.283536	0.671545	0.283536
ATP2B1	-0.184111	0.661818	-1.09837	0.033316	-1.09837	0.033316	0.154684	0.446045	0.123909	0.799354	0.123909	0.799354	0.348789	0.972727	0.941116	0.209108	0.941116	0.209108
SLC25A3	-0.144478	0.547574	0.624557	0.0956788	0.624557	0.0956788	0.209656	0.407443	0.611522	0.292756	0.611522	0.292756	0.00290054	0.998911	-0.670602	0.225402	-0.670602	0.225402
TPT1	-0.48227	0.0904073	-0.912291	0.0279847	-0.912291	0.0279847	-0.162347	0.422277	-0.00305762	0.993337	-0.00305762	0.993337	0.138456	0.972727	-0.172416	0.719084	-0.172416	0.719084
GMFB	-0.0321372	0.945418	-1.14886	0.00882657	-1.14886	0.00882657	0.196241	0.401032	0.287378	0.434413	0.287378	0.434413	0.135612	0.992554	0.875121	0.175218	0.875121	0.175218
RTN1	-0.757274	0.0235537	-1.06347	0.0192882	-1.06347	0.0192882	0.391476	0.119161	0.748887	0.201906	0.748887	0.201906	-0.0645426	0.992554	0.391606	0.445907	0.391606	0.445907
DLST	-0.0895437	0.702255	0.502236	0.171987	0.502236	0.171987	0.00973062	0.959392	-0.476967	0.316648	-0.476967	0.316648	0.0146876	0.99545	-0.459283	0.349331	-0.459283	0.349331
CALM1	0.27859	0.281814	-1.02481	0.0382049	-1.02481	0.0382049	0.185709	0.541116	-0.230302	0.568732	-0.230302	0.568732	-0.0290577	0.992767	0.712369	0.272443	0.712369	0.272443
CKB	-0.524479	0.0913765	0.418359	0.24987	0.418359	0.24987	0.0848551	0.816204	0.804572	0.135443	0.804572	0.135443	0.351404	0.972727	-0.576455	0.269471	-0.576455	0.269471
CKMT1B	-2.85271	0.000152286	-2.06309	0.0010009	-2.06309	0.0010009	0.252189	0.22127	0.717038	0.128005	0.717038	0.128005	0.418408	0.972727	-0.340036	0.535659	-0.340036	0.535659
TMOD2	-1.0309	0.131071	-1.70119	0.00310316	-1.70119	0.00310316	0.284062	0.162712	-0.426131	0.345728	-0.426131	0.345728	-0.23088	0.990269	0.840525	0.215342	0.840525	0.215342
IDH3A	0.64884	0.0446626	-0.327959	0.493907	-0.327959	0.493907	-0.0414725	0.855029	0.0660405	0.836287	0.0660405	0.836287	-0.244952	0.972727	0.418408	0.49341	0.418408	0.49341
UQCRC2	0.69067	0.0198935	0.124596	0.834371	0.124596	0.834371	0.0961633	0.628667	0.0712319	0.854104	0.0712319	0.854104	-0.459883	0.972727	0.0911656	0.900958	0.0911656	0.900958
ALDOA	0.42946	0.119503	1.36439	0.00399481	1.36439	0.00399481	0.240192	0.234186	0.868373	0.0834885	0.868373	0.0834885	0.187037	0.972727	-0.828607	0.186505	-0.828607	0.186505
STX1B	-0.45846	0.0873941	0.182695	0.66399	0.182695	0.66399	0.363952	0.576487	-0.319896	0.527045	-0.319896	0.527045	-0.000812279	0.999144	-1.0394	0.170188	-1.0394	0.170188
GNAO1	-2.49562	0.000368508	-2.48596	0.000112261	-2.48596	0.000112261	0.377924	0.0515265	-0.151541	0.699361	-0.151541	0.699361	0.0270407	0.994406	-0.101555	0.830717	-0.101555	0.830717
GOT2	-0.150193	0.514872	-0.100624	0.793333	-0.100624	0.793333	0.214851	0.279485	-0.356291	0.417643	-0.356291	0.417643	-0.0219363	0.994683	-0.236226	0.610076	-0.236226	0.610076
ENO3	-0.348688	0.191299	-0.169461	0.664152	-0.169461	0.664152	0.0623724	0.729968	0.500491	0.34225	0.500491	0.34225	0.283328	0.972727	-0.121885	0.803739	-0.121885	0.803739
C1QBP	-0.193174	0.481868	-0.112264	0.777472	-0.112264	0.777472	0.0101955	0.982153	0.107723	0.861095	0.107723	0.861095	0.163428	0.972727	-0.129163	0.791803	-0.129163	0.791803
DLG4	0.517121	0.0952549	1.08273	0.0205687	1.08273	0.0205687	0.213602	0.244203	-0.294132	0.50562	-0.294132	0.50562	-0.267301	0.972727	-0.526966	0.342971	-0.526966	0.342971
MYH10	1.31576	0.00194075	-0.171442	0.755541	-0.171442	0.755541	-0.175238	0.423052	0.538508	0.183856	0.538508	0.183856	-0.607093	0.892153	0.545344	0.424597	0.545344	0.424597
ALDOC	0.884249	0.0078335	1.61148	0.0018276	1.61148	0.0018276	0.0491081	0.792423	-0.10752	0.749614	-0.10752	0.749614	-0.461963	0.972727	-1.30678	0.134655	-1.30678	0.134655
ACACA	0.623721	0.0291625	-0.132974	0.780848	-0.132974	0.780848	0.757226	0.00454645	0.9156	0.0990033	0.9156	0.0990033	-0.510922	0.972727	0.0779743	0.895341	0.0779743	0.895341
ACLY	0.287845	0.219309	-0.0392017	0.935235	-0.0392017	0.935235	0.436209	0.102959	0.264284	0.490654	0.264284	0.490654	-0.376528	0.972727	0.204428	0.720653	0.204428	0.720653
CNP	-0.203198	0.438102	0.359531	0.336714	0.359531	0.336714	-1.81389	0.109157	-1.11759	0.0596533	-1.11759	0.0596533	0.197542	0.972727	-0.629286	0.252655	-0.629286	0.252655
ATP6V0A1	1.12813	0.00363754	1.47333	0.00279485	1.47333	0.00279485	0.0361353	0.881331	1.43146	0.0385735	1.43146	0.0385735	-0.0515169	0.992554	-0.436387	0.373054	-0.436387	0.373054
MAPT	1.46657	0.00144738	1.36642	0.00447334	1.36642	0.00447334	0.313071	0.214004	-0.158342	0.687549	-0.158342	0.687549	-0.0206112	0.99482	-0.435717	0.37931	-0.435717	0.37931
NME2	-0.00131632	0.996632	-0.0698857	0.881305	-0.0698857	0.881305	0.502204	0.0218068	0.363365	0.373612	0.363365	0.373612	-0.0864918	0.992554	0.672239	0.280561	0.672239	0.280561
CLTC	1.19538	0.0168251	-0.271245	0.614688	-0.271245	0.614688	0.0628969	0.757847	-0.647766	0.0922571	-0.647766	0.0922571	-0.457138	0.972727	0.622183	0.375896	0.622183	0.375896
NPTX1	1.9399	0.000500419	1.30495	0.00640709	1.30495	0.00640709	0.0639402	0.69373	0.379093	0.365265	0.379093	0.365265	0.202713	0.972727	0.71677	0.224197	0.71677	0.224197
DLGAP1	0.127748	0.655085	-0.474714	0.25006	-0.474714	0.25006	0.215893	0.299206	0.00169087	0.996811	0.00169087	0.996811	-0.167011	0.972727	0.622631	0.284685	0.622631	0.284685
NDUFV2	0.248772	0.299892	-0.175754	0.659512	-0.175754	0.659512	1.54907	0.00274422	0.668384	0.228683	0.668384	0.228683	0.0651536	0.992554	0.0571231	0.909882	0.0571231	0.909882
ATP5A1	0.1013	0.667081	-0.120585	0.779166	-0.120585	0.779166	-0.330182	0.204545	-0.11882	0.776055	-0.11882	0.776055	-0.22675	0.972727	-0.19434	0.710534	-0.19434	0.710534
MBP	4.57647	0.000114973	4.47285	9.74221e-06	4.47285	9.74221e-06	0.197489	0.322155	1.01223	0.0496422	1.01223	0.0496422	-1.01656	0.892153	-0.0611337	0.919492	-0.0611337	0.919492
DNM2	-0.0789555	0.783329	0.68795	0.0811013	0.68795	0.0811013	0.345403	0.191335	0.701819	0.251855	0.701819	0.251855	0.116363	0.980998	-0.487111	0.341747	-0.487111	0.341747
PRDX2	-0.699424	0.0336728	-0.122056	0.757692	-0.122056	0.757692	-0.0346159	0.838613	0.588564	0.133392	0.588564	0.133392	0.294429	0.972727	-0.683967	0.230057	-0.683967	0.230057
RAB3A	0.437087	0.137347	1.28136	0.00600323	1.28136	0.00600323	0.419593	0.242462	0.610898	0.306022	0.610898	0.306022	-0.0137883	0.996668	-1.00843	0.160623	-1.00843	0.160623
RPS19	-0.362529	0.284025	0.915151	0.0452461	0.915151	0.0452461	0.118123	0.622309	0.652863	0.233676	0.652863	0.233676	0.238806	0.972727	-0.949514	0.188254	-0.949514	0.188254
ATP1A3	-1.01413	0.0108797	-0.101867	0.800271	-0.101867	0.800271	0.385914	0.654921	0.927195	0.286726	0.927195	0.286726	0.198334	0.972727	-0.714664	0.224197	-0.714664	0.224197
NAPA	-0.00524868	0.987029	0.490287	0.209878	0.490287	0.209878	0.183108	0.423327	-0.168548	0.646065	-0.168548	0.646065	0.294579	0.972727	-0.457965	0.374429	-0.457965	0.374429
SYT5	0.951055	0.0199349	2.11373	0.000498665	2.11373	0.000498665	0.540318	0.0127665	0.588172	0.212581	0.588172	0.212581	0.420204	0.972727	-0.603557	0.280507	-0.603557	0.280507
RAB10	-0.874345	0.0317629	-2.09361	0.000710393	-2.09361	0.000710393	0.204341	0.495355	0.0421668	0.914801	0.0421668	0.914801	0.0472728	0.992557	0.629839	0.281402	0.629839	0.281402
DPYSL5	-1.85202	0.00109826	-1.30545	0.00750277	-1.30545	0.00750277	0.251478	0.342851	0.511979	0.312932	0.511979	0.312932	0.303989	0.972727	-0.33623	0.506193	-0.33623	0.506193
SUCLG1	0.286929	0.240917	0.681506	0.0744911	0.681506	0.0744911	0.267177	0.256779	-0.00315802	0.992347	-0.00315802	0.992347	-0.00023036	0.999603	-0.450617	0.356991	-0.450617	0.356991
BIN1	0.160113	0.521562	0.809321	0.0427753	0.809321	0.0427753	0.20237	0.287063	-0.253413	0.599511	-0.253413	0.599511	-0.00779433	0.997312	-0.711171	0.216269	-0.711171	0.216269
NCKAP1	0.0703412	0.857482	-1.02762	0.0202578	-1.02762	0.0202578	0.211602	0.349639	0.192955	0.637832	0.192955	0.637832	0.218869	0.972727	0.561836	0.299837	0.561836	0.299837
HSPD1	0.315453	0.367619	-0.822271	0.155707	-0.822271	0.155707	-0.0698017	0.664945	0.101845	0.822409	0.101845	0.822409	-0.235002	0.972727	0.682132	0.369753	0.682132	0.369753
SNAP25	0.447129	0.119329	-0.749276	0.143918	-0.749276	0.143918	0.496729	0.0723157	-0.151956	0.744817	-0.151956	0.744817	-0.136052	0.973712	0.873353	0.242966	0.873353	0.242966
PYGB	0.0769234	0.779293	0.916786	0.027061	0.916786	0.027061	0.398518	0.128735	-0.244382	0.564517	-0.244382	0.564517	0.0997634	0.987368	-0.622415	0.252655	-0.622415	0.252655
YWHAB	0.408339	0.14361	-0.00686033	0.988122	-0.00686033	0.988122	-0.110582	0.515972	0.758186	0.200852	0.758186	0.200852	-0.129217	0.974689	0.114641	0.832056	0.114641	0.832056
SYNJ1	0.666462	0.189822	-0.512376	0.212203	-0.512376	0.212203	-0.604411	0.0631032	0.279216	0.616544	0.279216	0.616544	-0.160558	0.992554	0.896877	0.193273	0.896877	0.193273
PFKL	-0.239408	0.361993	0.561249	0.137057	0.561249	0.137057	0.0921117	0.541935	-0.0315118	0.939519	-0.0315118	0.939519	0.140107	0.972727	-0.690749	0.224197	-0.690749	0.224197
S100B	2.08686	0.0012611	2.09338	0.00577406	2.09338	0.00577406	0.00636039	0.982585	0.268404	0.558899	0.268404	0.558899	0.0711071	0.992554	0.320902	0.676226	0.320902	0.676226
MIF	-0.114141	0.748827	0.877601	0.0567812	0.877601	0.0567812	0.216953	0.281499	0.442621	0.284364	0.442621	0.284364	0.280503	0.972727	-0.128297	0.817568	-0.128297	0.817568
AP1B1	0.00841094	0.975554	0.800907	0.0486609	0.800907	0.0486609	0.734502	0.00380118	0.427117	0.252618	0.427117	0.252618	0.125762	0.973712	-0.58883	0.275201	-0.58883	0.275201
ACO2	0.575244	0.044748	1.27773	0.00593209	1.27773	0.00593209	0.0750763	0.676443	0.58607	0.147327	0.58607	0.147327	0.0557004	0.992554	-0.612493	0.256159	-0.612493	0.256159
SYN2	-1.26228	0.016704	-1.2949	0.0679144	-1.2949	0.0679144	-0.0259323	0.906103	0.18812	0.574081	0.18812	0.574081	0.148864	0.987552	0.788336	0.375961	0.788336	0.375961
TKT	-0.173658	0.504492	0.784166	0.0467763	0.784166	0.0467763	0.219146	0.272548	0.704474	0.184577	0.704474	0.184577	0.161902	0.972727	-0.703798	0.217263	-0.703798	0.217263
PDHB	0.356605	0.154475	0.0258214	0.951406	0.0258214	0.951406	0.495317	0.104515	0.0980693	0.83445	0.0980693	0.83445	-0.157936	0.972727	-0.157365	0.760705	-0.157365	0.760705
TAGLN3	-0.541666	0.103452	0.136018	0.742958	0.136018	0.742958	0.148134	0.453158	0.500468	0.277265	0.500468	0.277265	0.391538	0.972727	-0.466636	0.37586	-0.466636	0.37586
GAP43	0.984113	0.00656418	0.672481	0.0826028	0.672481	0.0826028	0.485888	0.064949	0.692949	0.211558	0.692949	0.211558	-0.114594	0.974689	-0.340285	0.47582	-0.340285	0.47582
CRMP1	-0.0569064	0.835961	0.48304	0.188191	0.48304	0.188191	0.368581	0.194551	0.547588	0.190067	0.547588	0.190067	0.21652	0.972727	-0.354568	0.451137	-0.354568	0.451137
UCHL1	0.472791	0.0810526	1.03158	0.0164968	1.03158	0.0164968	0.846586	0.0115461	0.07282	0.855158	0.07282	0.855158	0.137321	0.972727	-0.677245	0.228888	-0.677245	0.228888
SNCA	1.12177	0.00677702	0.452963	0.263149	0.452963	0.263149	0.0913988	0.621621	0.563079	0.271631	0.563079	0.271631	-0.374617	0.972727	0.0168243	0.976525	0.0168243	0.976525
CAMK2D	1.18316	0.0410288	0.200044	0.673079	0.200044	0.673079	0.432649	0.284527	0.290649	0.519818	0.290649	0.519818	-0.273293	0.972727	0.502032	0.40833	0.502032	0.40833
SLC25A4	0.104322	0.669861	-0.097344	0.813333	-0.097344	0.813333	0.589959	0.0388269	-0.416916	0.446697	-0.416916	0.446697	-0.0995622	0.982045	-0.0235983	0.964361	-0.0235983	0.964361
BASP1	-0.217859	0.396904	-0.53904	0.152455	-0.53904	0.152455	0.213659	0.221917	-0.0923332	0.777818	-0.0923332	0.777818	-0.00943532	0.997152	0.0319405	0.947846	0.0319405	0.947846
MAP1B	1.23212	0.0364038	0.499865	0.263269	0.499865	0.263269	0.0472774	0.766401	-0.396271	0.351327	-0.396271	0.351327	-0.363803	0.972727	0.410404	0.475213	0.410404	0.475213
VDAC1	0.318984	0.168164	-0.477623	0.297473	-0.477623	0.297473	-0.036352	0.874647	-0.0968937	0.818006	-0.0968937	0.818006	-0.156444	0.972727	0.282545	0.628996	0.282545	0.628996
HSPA9	0.655438	0.0562949	-0.408782	0.479006	-0.408782	0.479006	0.00131458	0.993565	-0.515221	0.171586	-0.515221	0.171586	-0.366537	0.972727	0.549673	0.459832	0.549673	0.459832
CAMK2A	1.64227	0.00659444	1.70072	0.0118711	1.70072	0.0118711	0.203054	0.637815	1.04133	0.0594934	1.04133	0.0594934	-0.402286	0.972727	0.36308	0.615341	0.36308	0.615341
SFXN1	0.194623	0.437935	-0.612404	0.127346	-0.612404	0.127346	-0.113855	0.514815	0.0169707	0.965662	0.0169707	0.965662	-0.0705233	0.992554	0.318515	0.523904	0.318515	0.523904
CLTB	0.428454	0.142819	1.27228	0.0132023	1.27228	0.0132023	0.227383	0.206176	0.145704	0.68263	0.145704	0.68263	0.322011	0.972727	-0.233607	0.674704	-0.233607	0.674704
SYNGAP1	0.0402277	0.892385	0.256539	0.50786	0.256539	0.50786	0.52215	0.0483902	-0.340131	0.52038	-0.340131	0.52038	-0.0588756	0.992554	-0.178977	0.71804	-0.178977	0.71804
PACSIN1	-1.25901	0.0518038	-0.186575	0.704239	-0.186575	0.704239	0.416716	0.0688345	-0.211895	0.616817	-0.211895	0.616817	0.735344	0.972727	-0.833666	0.240509	-0.833666	0.240509
HSP90AB1	0.20736	0.345563	0.178325	0.68125	0.178325	0.68125	-0.0678131	0.710311	-0.31531	0.446571	-0.31531	0.446571	-0.22717	0.972727	-0.284921	0.597105	-0.284921	0.597105
SNAP91	2.57438	0.000769634	0.858187	0.0607128	0.858187	0.0607128	0.218035	0.393681	-0.142674	0.694523	-0.142674	0.694523	-0.189987	0.972727	-0.066655	0.905199	-0.066655	0.905199
STX7	0.986639	0.0569649	-0.356883	0.449401	-0.356883	0.449401	0.203746	0.275598	-0.138097	0.738828	-0.138097	0.738828	-0.218424	0.974689	0.556467	0.374258	0.556467	0.374258
SOD2	-0.482146	0.120587	-1.10544	0.0280315	-1.10544	0.0280315	0.307336	0.108717	-0.521162	0.212094	-0.521162	0.212094	-0.177383	0.972727	0.267713	0.641834	0.267713	0.641834
SEPT7	-0.0498362	0.922279	-1.12068	0.0583336	-1.12068	0.0583336	0.0868046	0.634142	0.892684	0.0829887	0.892684	0.0829887	0.142066	0.992554	0.769945	0.316971	0.769945	0.316971
AMPH	-1.23706	0.00274676	-1.85843	0.00172253	-1.85843	0.00172253	0.205785	0.41085	0.987596	0.103096	0.987596	0.103096	0.053749	0.992554	0.592771	0.314539	0.592771	0.314539
CAMK2B	2.16981	0.0260737	1.2953	0.0293036	1.2953	0.0293036	0.178285	0.335372	0.684831	0.178309	0.684831	0.178309	0.0785137	0.994406	0.386034	0.5704	0.386034	0.5704
STX1A	0.145381	0.586516	0.930984	0.0330072	0.930984	0.0330072	-0.222579	0.485849	0.555026	0.378733	0.555026	0.378733	0.267745	0.972727	-0.471151	0.371464	-0.471151	0.371464
MDH2	-0.0522548	0.836484	0.910801	0.0274696	0.910801	0.0274696	0.0676645	0.846443	0.33707	0.501717	0.33707	0.501717	0.126602	0.972727	-0.776191	0.201283	-0.776191	0.201283
ABCB1	0.10767	0.831935	-1.42197	0.00751531	-1.42197	0.00751531	-1.02608	0.0109644	-1.50572	0.220723	-1.50572	0.220723	-0.749149	0.972727	0.515954	0.369782	0.515954	0.369782
GNB2	0.192882	0.464107	0.993239	0.0238123	0.993239	0.0238123	0.195087	0.480336	-0.14078	0.670199	-0.14078	0.670199	0.183966	0.972727	-0.683198	0.240495	-0.683198	0.240495
DPYSL2	-0.179051	0.408753	-0.988057	0.0385413	-0.988057	0.0385413	0.143313	0.434572	0.107198	0.796688	0.107198	0.796688	-0.0240612	0.993597	0.471388	0.410365	0.471388	0.410365
VDAC3	-0.102072	0.68223	-0.761031	0.122294	-0.761031	0.122294	0.282013	0.191243	0.0736976	0.815537	0.0736976	0.815537	-0.053635	0.992554	0.233451	0.704325	0.233451	0.704325
RAB2A	0.51607	0.100065	-0.676022	0.0889051	-0.676022	0.0889051	0.11393	0.492358	-0.472986	0.380101	-0.472986	0.380101	0.0234215	0.994957	0.298108	0.539777	0.298108	0.539777
RIMS2	-0.218189	0.506667	-1.00683	0.0316035	-1.00683	0.0316035	0.0267978	0.86812	-0.0880645	0.805471	-0.0880645	0.805471	-0.588379	0.972727	0.808312	0.218133	0.808312	0.218133
VCP	0.224864	0.324402	0.153954	0.696643	0.153954	0.696643	-1.66452	0.0212024	0.056341	0.941951	0.056341	0.941951	-0.20275	0.972727	-0.112707	0.819067	-0.112707	0.819067
TPM2	2.16743	0.000941685	3.36585	1.7045e-05	3.36585	1.7045e-05	-0.842143	0.0163797	-0.75764	0.168702	-0.75764	0.168702	0.220279	0.972727	-0.670813	0.240522	-0.670813	0.240522
TJP2	0.230292	0.311295	-0.799144	0.0910867	-0.799144	0.0910867	-0.129515	0.571826	0.180791	0.647383	0.180791	0.647383	-0.114361	0.973712	0.380517	0.512325	0.380517	0.512325
HSPA5	1.68751	0.00197313	0.882875	0.125843	0.882875	0.125843	-0.0615419	0.809138	0.749242	0.0491383	0.749242	0.0491383	-0.554355	0.972727	0.231737	0.750802	0.231737	0.750802
AK1	0.489257	0.108343	1.12483	0.0179634	1.12483	0.0179634	0.518168	0.288985	0.33609	0.407201	0.33609	0.407201	0.0994379	0.990269	-0.595362	0.301091	-0.595362	0.301091
DNM1	-0.0566841	0.837973	0.229172	0.554962	0.229172	0.554962	0.103299	0.629188	-0.0251684	0.948775	-0.0251684	0.948775	-0.205203	0.972727	-0.43416	0.392911	-0.43416	0.392911
PDHA1	0.025035	0.916962	-0.527824	0.23035	-0.527824	0.23035	-0.205564	0.352785	-0.495683	0.252476	-0.495683	0.252476	-0.119172	0.972727	0.00410248	0.995266	0.00410248	0.995266
MAOA	4.39123	0.000943078	3.87729	9.74013e-06	3.87729	9.74013e-06	0.545442	0.274921	0.0336787	0.943569	0.0336787	0.943569	-0.540143	0.972727	0.621706	0.279945	0.621706	0.279945
SYN1	0.574695	0.0392666	1.30665	0.00591376	1.30665	0.00591376	0.253883	0.505465	1.10384	0.023496	1.10384	0.023496	0.263744	0.972727	-0.740863	0.213223	-0.740863	0.213223
SYP	-0.469572	0.124779	0.41268	0.311724	0.41268	0.311724	-0.152276	0.618096	0.541487	0.11636	0.541487	0.11636	0.283782	0.972727	-0.646876	0.270305	-0.646876	0.270305
HSD17B10	-0.351262	0.217296	0.444512	0.250671	0.444512	0.250671	-0.0531062	0.737395	0.684534	0.252294	0.684534	0.252294	0.257393	0.972727	-0.654843	0.250114	-0.654843	0.250114
SLC25A5	0.0552483	0.846174	0.664635	0.083254	0.664635	0.083254	0.343183	0.0846164	0.399041	0.305995	0.399041	0.305995	-0.0698112	0.992554	-0.675785	0.22775	-0.675785	0.22775
IDH3G	-0.218015	0.420261	0.637141	0.0910867	0.637141	0.0910867	-0.110531	0.605768	0.862094	0.164419	0.862094	0.164419	0.192949	0.972727	-0.753743	0.202548	-0.753743	0.202548
GDI1	0.197218	0.392392	0.76129	0.0531809	0.76129	0.0531809	0.317498	0.251638	0.276035	0.592588	0.276035	0.592588	0.0270897	0.992767	-0.610353	0.255725	-0.610353	0.255725

## Sheet: Table S2b. High eIF4E Sens. Tr.
Gene Set Description		Larsson et al. Cancer Res. (2007) PMID: 17638893
Cytosolic mRNA log2FC		Changes in cytosolic mRNA levels measured by RNA-sequencing
Polysome-associated mRNA log2FC		Changes in polysome-associated mRNA levels measured by RNA-sequencing
Translation log2FC		Changes in mRNA translation efficiency corrected by changes in total mRNA levels, calculated by anota2seq
	TSC1-/- vs TSC1+/+						ASD vs Control BA19						TSC1-/- + Rapamycin vs TSC1-/-
Gene Symbol	Cytosolic mRNA Log2FC	FDR	Polysome-associated mRNA log2FC	FDR	Translation log2FC	FDR	Cytosolic mRNA Log2FC	p- value	Polysome-associated mRNA log2FC	p-value	Translation log2FC	p-value	Cytosolic mRNA Log2FC	FDR	Polysome-associated mRNA log2FC	FDR	Translation log2FC	FDR
A1BG	0.774926	0.0619007	1.31847	0.00519795	1.31847	0.00519795	0.111339	0.794858	0.86986	0.0414145	0.86986	0.0414145	-0.220916	0.972727	-0.766534	0.205005	-0.766534	0.205005
AAAS	-0.760403	0.0171609	-0.0554346	0.886931	-0.0554346	0.886931	0.0620766	0.796684	0.132403	0.763648	0.132403	0.763648	0.222735	0.972727	-0.506186	0.316447	-0.506186	0.316447
AAMP	-0.469359	0.131433	0.183311	0.642101	0.183311	0.642101	-0.0858558	0.817163	0.937536	0.077439	0.937536	0.077439	0.219981	0.972727	-0.662335	0.24709	-0.662335	0.24709
ABCF2	-0.403492	0.11053	0.0729985	0.850254	0.0729985	0.850254	0.181334	0.369793	0.455362	0.262309	0.455362	0.262309	0.0731318	0.992554	-0.349643	0.457618	-0.349643	0.457618
ABI2	0.340911	0.178344	-0.563325	0.175067	-0.563325	0.175067	0.177789	0.28602	-0.20527	0.62394	-0.20527	0.62394	-0.0848182	0.990269	0.615098	0.288134	0.615098	0.288134
ABT1	-0.581119	0.0714713	-0.0394275	0.930086	-0.0394275	0.930086	0.0621759	0.858537	0.476134	0.373937	0.476134	0.373937	0.136063	0.976717	-0.465202	0.39551	-0.465202	0.39551
ACAT2	0.0599749	0.806382	-0.344818	0.397342	-0.344818	0.397342	0.420141	0.13196	-0.0395147	0.941469	-0.0395147	0.941469	-0.096529	0.982341	-0.149121	0.777472	-0.149121	0.777472
ACD	-0.266394	0.324673	0.518246	0.188191	0.518246	0.188191	-0.359385	0.114771	0.157896	0.74401	0.157896	0.74401	0.136709	0.973712	-0.623321	0.267915	-0.623321	0.267915
ACOT7	-0.285815	0.273571	0.593199	0.115543	0.593199	0.115543	0.222565	0.263709	0.852946	0.124592	0.852946	0.124592	0.185155	0.972727	-0.847365	0.182865	-0.847365	0.182865
ACP1	-0.063172	0.804135	-1.41842	0.00381698	-1.41842	0.00381698	-0.0542656	0.78869	0.0262529	0.943118	0.0262529	0.943118	0.0670051	0.992554	0.676667	0.232597	0.676667	0.232597
ACTR1A	0.0248333	0.92523	0.759274	0.0561286	0.759274	0.0561286	0.233791	0.362107	0.374621	0.385451	0.374621	0.385451	0.0865255	0.990269	-0.637414	0.24709	-0.637414	0.24709
ACTR1B	-0.671085	0.0321744	0.0272	0.953182	0.0272	0.953182	0.180208	0.244157	1.07236	0.0558992	1.07236	0.0558992	0.0765556	0.992554	-0.464589	0.413082	-0.464589	0.413082
ACTR3B	0.337063	0.15091	-0.364805	0.319188	-0.364805	0.319188	0.0131112	0.935868	0.634895	0.114654	0.634895	0.114654	-0.11789	0.972727	0.112433	0.811533	0.112433	0.811533
ACY1	-0.800395	0.187453	1.37687	0.00534198	1.37687	0.00534198	NA	NA	NA	NA	NA	NA	0.36329	0.972727	-0.129245	0.798061	-0.129245	0.798061
ACYP1	0.112436	0.770646	-0.0572576	0.883057	-0.0572576	0.883057	-0.129225	0.589088	0.967356	0.0452508	0.967356	0.0452508	-0.319376	0.972727	-0.0466238	0.921246	-0.0466238	0.921246
ACYP2	0.0762787	0.829859	-0.817327	0.0891266	-0.817327	0.0891266	-0.199992	0.385353	-0.178828	0.671919	-0.178828	0.671919	-0.102433	0.992554	1.0236	0.191829	1.0236	0.191829
ADA	0.0980655	0.721733	0.920462	0.0410216	0.920462	0.0410216	0.452699	0.318772	1.56039	0.0661827	1.56039	0.0661827	-0.112117	0.981299	-1.09147	0.163944	-1.09147	0.163944
ADI1	-0.228674	0.505391	-0.166456	0.684869	-0.166456	0.684869	-0.445082	0.10868	-0.606231	0.208943	-0.606231	0.208943	0.419686	0.972727	0.401145	0.438853	0.401145	0.438853
ADIPOR1	0.478677	0.0797415	0.651309	0.0989537	0.651309	0.0989537	0.00385712	0.987805	-0.244935	0.601042	-0.244935	0.601042	0.0298402	0.992557	0.162561	0.740975	0.162561	0.740975
AGPS	0.368345	0.287763	-0.772971	0.126592	-0.772971	0.126592	0.139624	0.521372	-0.146648	0.705451	-0.146648	0.705451	-0.278154	0.972727	0.509906	0.427318	0.509906	0.427318
AHCY	-0.474639	0.0841175	0.512465	0.17046	0.512465	0.17046	0.0403776	0.792815	0.519304	0.243977	0.519304	0.243977	0.306088	0.972727	-0.805212	0.193647	-0.805212	0.193647
AHSA1	-0.236431	0.336201	-0.257841	0.482971	-0.257841	0.482971	0.00862014	0.980064	0.656239	0.0967063	0.656239	0.0967063	0.0972838	0.984251	-0.165873	0.725382	-0.165873	0.725382
AIP	-0.371295	0.168164	0.50608	0.179474	0.50608	0.179474	-0.143328	0.41842	0.868086	0.0669513	0.868086	0.0669513	0.136354	0.972727	-0.765176	0.206536	-0.765176	0.206536
AK1	0.489257	0.108343	1.12483	0.0179634	1.12483	0.0179634	-0.0615419	0.809138	0.749242	0.0491383	0.749242	0.0491383	0.0994379	0.990269	-0.595362	0.301091	-0.595362	0.301091
AK2	-0.187312	0.42546	-0.00991762	0.980074	-0.00991762	0.980074	-0.0713363	0.762345	-0.0233787	0.956395	-0.0233787	0.956395	0.0453202	0.992557	-0.142993	0.766366	-0.142993	0.766366
AKR1A1	-0.473293	0.0737797	0.343635	0.351795	0.343635	0.351795	-0.158826	0.412919	0.710403	0.116053	0.710403	0.116053	0.104161	0.980068	-0.728315	0.213217	-0.728315	0.213217
AKR7A2	-0.417939	0.154488	0.405753	0.31911	0.405753	0.31911	-0.200493	0.245439	0.781146	0.130391	0.781146	0.130391	0.387909	0.972727	-0.579376	0.307721	-0.579376	0.307721
AKT1	-0.0310935	0.917253	0.707105	0.114997	0.707105	0.114997	-0.265948	0.270397	0.215724	0.590394	0.215724	0.590394	0.104991	0.987368	-0.190217	0.735399	-0.190217	0.735399
ALDH1B1	-0.561002	0.0452902	-0.8301	0.0768274	-0.8301	0.0768274	0.350072	0.283924	0.573652	0.32193	0.573652	0.32193	-0.337032	0.972727	0.0753269	0.897248	0.0753269	0.897248
ALDOA	0.42946	0.119503	1.36439	0.00399481	1.36439	0.00399481	0.240192	0.234186	0.868373	0.0834885	0.868373	0.0834885	0.187037	0.972727	-0.828607	0.186505	-0.828607	0.186505
ALDOC	0.884249	0.0078335	1.61148	0.0018276	1.61148	0.0018276	-0.175238	0.423052	0.538508	0.183856	0.538508	0.183856	-0.461963	0.972727	-1.30678	0.134655	-1.30678	0.134655
ALKBH2	-1.09199	0.00612671	-0.747468	0.0547187	-0.747468	0.0547187	0.0425192	0.910139	0.373816	0.469425	0.373816	0.469425	0.0714934	0.992554	-0.24054	0.603037	-0.24054	0.603037
ALKBH3	0.977622	0.0122833	0.912441	0.0284631	0.912441	0.0284631	0.00132848	0.995933	0.394432	0.511143	0.394432	0.511143	-0.0498754	0.992557	-0.146721	0.762428	-0.146721	0.762428
ALKBH4	-0.482655	0.121912	0.0484551	0.912016	0.0484551	0.912016	0.0750212	0.750634	0.745118	0.0843056	0.745118	0.0843056	0.211156	0.972727	-0.523698	0.346097	-0.523698	0.346097
ALKBH5	-0.122815	0.66686	0.156433	0.714311	0.156433	0.714311	-0.107859	0.521833	0.657212	0.0992805	0.657212	0.0992805	0.0592734	0.992554	-0.0998819	0.850714	-0.0998819	0.850714
AMZ2	0.267397	0.259962	-0.371851	0.341091	-0.371851	0.341091	0.0836416	0.722022	0.348208	0.433288	0.348208	0.433288	-0.170154	0.972727	0.699564	0.234334	0.699564	0.234334
ANAPC11	-0.0897683	0.780336	0.780048	0.0658868	0.780048	0.0658868	0.0496969	0.796021	0.964764	0.036134	0.964764	0.036134	0.218148	0.972727	-0.229375	0.653129	-0.229375	0.653129
ANAPC2	-0.561385	0.0594409	0.13892	0.714151	0.13892	0.714151	-0.11373	0.773987	0.960456	0.251518	0.960456	0.251518	0.251714	0.972727	-0.308064	0.510607	-0.308064	0.510607
ANAPC5	-0.495279	0.0639306	-0.606828	0.106431	-0.606828	0.106431	0.0377175	0.809414	0.284706	0.434958	0.284706	0.434958	0.109942	0.977929	0.225033	0.627563	0.225033	0.627563
ANKHD1	0.338273	0.190473	-0.408374	0.276215	-0.408374	0.276215	0.290464	0.155578	0.4786	0.243089	0.4786	0.243089	-0.220312	0.972727	0.083036	0.864015	0.083036	0.864015
ANKRD13B	-0.715115	0.0351036	0.0387147	0.932818	0.0387147	0.932818	0.162274	0.568457	0.793822	0.131272	0.793822	0.131272	0.177097	0.972727	-0.469784	0.39762	-0.469784	0.39762
ANTXR1	-0.213732	0.476899	-1.5489	0.00688362	-1.5489	0.00688362	-0.569377	0.0681809	-0.220704	0.642784	-0.220704	0.642784	0.131512	0.980068	1.18731	0.168817	1.18731	0.168817
ANXA6	1.00752	0.00658121	1.69194	0.00128495	1.69194	0.00128495	0.189402	0.496855	0.22211	0.566834	0.22211	0.566834	-0.0399905	0.992557	-0.572113	0.276866	-0.572113	0.276866
AP1M1	-0.341578	0.198978	0.46725	0.211766	0.46725	0.211766	0.0949895	0.655542	0.571202	0.248175	0.571202	0.248175	0.153583	0.972727	-0.729814	0.213223	-0.729814	0.213223
AP2M1	-0.135706	0.601063	0.387811	0.358631	0.387811	0.358631	0.206363	0.295825	0.677598	0.179295	0.677598	0.179295	0.140317	0.972727	-0.35045	0.51733	-0.35045	0.51733
AP2S1	0.0153379	0.96329	1.12364	0.0243219	1.12364	0.0243219	0.257196	0.182673	0.790303	0.0720535	0.790303	0.0720535	0.377303	0.972727	-0.200316	0.725732	-0.200316	0.725732
APCDD1	-0.133088	0.580809	-0.490259	0.183799	-0.490259	0.183799	-0.555269	0.0380761	0.537404	0.284789	0.537404	0.284789	-0.0475101	0.992557	0.359579	0.446462	0.359579	0.446462
APEH	0.314823	0.205332	1.28413	0.00600171	1.28413	0.00600171	0.066612	0.734825	0.310073	0.489654	0.310073	0.489654	0.0615138	0.992554	-0.727331	0.213445	-0.727331	0.213445
APEX1	-0.980641	0.00744178	-0.681761	0.0725468	-0.681761	0.0725468	-0.00708131	0.972557	0.218156	0.574446	0.218156	0.574446	0.150108	0.972727	-0.228507	0.618777	-0.228507	0.618777
APEX2	-0.0579445	0.817095	0.521225	0.175891	0.521225	0.175891	0.2051	0.363572	0.297416	0.562182	0.297416	0.562182	0.104021	0.980068	-0.391474	0.428896	-0.391474	0.428896
APOA1BP	0.491709	0.093309	1.27395	0.013084	1.27395	0.013084	-0.0841	0.669859	0.541004	0.26463	0.541004	0.26463	0.204155	0.972727	-0.412838	0.462143	-0.412838	0.462143
APRT	-0.4288	0.183215	0.366977	0.410968	0.366977	0.410968	0.0305683	0.909361	1.15919	0.0245546	1.15919	0.0245546	0.345679	0.972727	-0.201482	0.725974	-0.201482	0.725974
ARAF	0.0603486	0.822372	0.865135	0.0658177	0.865135	0.0658177	-0.332203	0.37093	0.0178956	0.96994	0.0178956	0.96994	0.108568	0.980998	-0.333495	0.555379	-0.333495	0.555379
ARF3	-0.1927	0.458162	0.33351	0.407689	0.33351	0.407689	0.252142	0.17949	0.535891	0.234055	0.535891	0.234055	0.147849	0.972727	-0.612762	0.282424	-0.612762	0.282424
ARF4	0.484768	0.0720374	-0.138026	0.73676	-0.138026	0.73676	-0.198108	0.242786	-0.212154	0.561593	-0.212154	0.561593	-0.139097	0.972727	-0.114829	0.820343	-0.114829	0.820343
ARF5	-0.422393	0.159341	0.494849	0.260057	0.494849	0.260057	0.0688959	0.715911	1.03992	0.0714152	1.03992	0.0714152	0.308633	0.972727	-0.193092	0.733348	-0.193092	0.733348
ARFGAP1	0.338832	0.257646	1.21179	0.00765028	1.21179	0.00765028	0.049626	0.819619	0.657682	0.149998	0.657682	0.149998	-0.102763	0.990269	-0.754837	0.206796	-0.754837	0.206796
ARFIP2	-0.133493	0.609826	0.308357	0.45832	0.308357	0.45832	0.211296	0.27829	0.85348	0.0698642	0.85348	0.0698642	0.195591	0.972727	-0.291864	0.580446	-0.291864	0.580446
ARFRP1	-0.142777	0.629983	0.737725	0.0824275	0.737725	0.0824275	-0.0686003	0.797374	0.854343	0.0450698	0.854343	0.0450698	0.311747	0.972727	-0.524946	0.341747	-0.524946	0.341747
ARHGDIA	0.337438	0.194988	1.06494	0.0230965	1.06494	0.0230965	0.190038	0.339897	0.872451	0.0973497	0.872451	0.0973497	0.186143	0.972727	-0.653061	0.271805	-0.653061	0.271805
ARHGDIB	0.491396	0.165379	0.164325	0.701661	0.164325	0.701661	-0.739921	0.0296747	-0.0349002	0.9392	-0.0349002	0.9392	-0.0661614	0.992557	0.246332	0.641834	0.246332	0.641834
ARHGEF18	-0.22887	0.372128	0.286023	0.436914	0.286023	0.436914	0.130467	0.548685	0.0373625	0.926149	0.0373625	0.926149	0.0067072	0.997312	-0.368761	0.439833	-0.368761	0.439833
ARIH1	0.259046	0.535998	-0.84831	0.0875789	-0.84831	0.0875789	0.215851	0.212638	-0.72185	0.115188	-0.72185	0.115188	-0.175823	0.981299	0.734509	0.279313	0.734509	0.279313
ARIH2	0.311858	0.222105	-0.128832	0.738449	-0.128832	0.738449	-0.057664	0.790425	-0.231388	0.487172	-0.231388	0.487172	-0.188447	0.972727	0.318345	0.500409	0.318345	0.500409
ARL2	-0.351726	0.205155	0.301736	0.506738	0.301736	0.506738	0.035636	0.886104	0.955394	0.0272533	0.955394	0.0272533	0.225017	0.972727	-0.383852	0.506211	-0.383852	0.506211
ARL2BP	0.0483651	0.837705	-1.33737	0.0160679	-1.33737	0.0160679	0.129741	0.63425	-0.245771	0.481782	-0.245771	0.481782	-0.125326	0.972727	1.55885	0.134655	1.55885	0.134655
ARL6IP4	-0.569357	0.093309	0.477947	0.282199	0.477947	0.282199	-0.0141678	0.936089	1.06954	0.0200774	1.06954	0.0200774	0.249344	0.972727	-0.612574	0.318387	-0.612574	0.318387
ARMC6	-0.542727	0.0760394	0.300365	0.421844	0.300365	0.421844	-0.083974	0.731324	0.69792	0.215344	0.69792	0.215344	0.309293	0.972727	-0.470062	0.351143	-0.470062	0.351143
ARMCX3	1.17574	0.0108919	0.0154356	0.974135	0.0154356	0.974135	0.0672004	0.70785	-0.199479	0.626014	-0.199479	0.626014	-0.0166769	0.99635	0.60767	0.32474	0.60767	0.32474
ARNTL2	0.352353	0.489257	-0.745513	0.0729239	-0.745513	0.0729239	-0.0579075	0.71152	-0.420739	0.356456	-0.420739	0.356456	-0.420481	0.972727	0.612487	0.277681	0.612487	0.277681
ARPC1A	-0.222929	0.336279	-0.283391	0.4393	-0.283391	0.4393	0.110065	0.579071	0.548803	0.326928	0.548803	0.326928	0.0817025	0.990269	-0.0912591	0.846583	-0.0912591	0.846583
ARPC1B	1.46933	0.00130782	1.81851	0.000921752	1.81851	0.000921752	-0.701869	0.0680415	0.877895	0.120302	0.877895	0.120302	-0.144104	0.972727	-0.797638	0.198952	-0.797638	0.198952
ARPC4	-0.376582	0.284308	0.319761	0.493277	0.319761	0.493277	0.084997	0.768338	0.78306	0.0503902	0.78306	0.0503902	0.452829	0.972727	-0.279746	0.637188	-0.279746	0.637188
ARPC5	0.452071	0.0708497	-0.73663	0.0766316	-0.73663	0.0766316	-0.0734765	0.732694	0.11118	0.765314	0.11118	0.765314	-0.00906975	0.997152	0.936831	0.180481	0.936831	0.180481
ARPC5L	0.176209	0.494711	0.357287	0.334628	0.357287	0.334628	0.279372	0.534317	0.35132	0.420734	0.35132	0.420734	0.0733839	0.992554	0.315545	0.505901	0.315545	0.505901
ARRDC1	0.367061	0.195401	1.08904	0.0168641	1.08904	0.0168641	-0.120388	0.696221	0.533967	0.198874	0.533967	0.198874	0.0383009	0.992557	-0.596728	0.284233	-0.596728	0.284233
ARRDC2	-0.280944	0.712816	1.68508	0.00302905	1.68508	0.00302905	-0.122339	0.685601	0.968577	0.129199	0.968577	0.129199	-0.191731	0.992554	-2.4336	0.0958625	-2.4336	0.0958625
ARTN	-1.49011	0.00202887	0.964455	0.0822926	0.964455	0.0822926	NA	NA	NA	NA	NA	NA	-0.0502013	0.992557	-1.26667	0.178827	-1.26667	0.178827
ASB1	0.389051	0.102519	0.234635	0.533285	0.234635	0.533285	0.233136	0.305064	0.368695	0.330577	0.368695	0.330577	-0.186817	0.972727	0.0846338	0.861015	0.0846338	0.861015
ASB6	-0.0296782	0.924245	0.718428	0.0748255	0.718428	0.0748255	0.13723	0.48124	0.837013	0.101736	0.837013	0.101736	0.0760028	0.992554	-0.539609	0.311852	-0.539609	0.311852
ASCC2	-0.193348	0.440231	0.391438	0.291012	0.391438	0.291012	-0.193661	0.420958	0.210975	0.733417	0.210975	0.733417	0.122529	0.974689	-0.342839	0.472888	-0.342839	0.472888
ASL	0.178627	0.514625	1.00561	0.0187205	1.00561	0.0187205	-0.193093	0.462803	0.944083	0.0666109	0.944083	0.0666109	0.147573	0.972727	-0.649155	0.241817	-0.649155	0.241817
ASNA1	-0.531278	0.0900907	0.200912	0.615886	0.200912	0.615886	-0.147196	0.569582	0.751222	0.135567	0.751222	0.135567	0.262118	0.972727	-0.555837	0.309377	-0.555837	0.309377
ASPHD1	1.12903	0.00327858	1.73773	0.0105283	1.73773	0.0105283	-0.164282	0.591805	0.751582	0.0590211	0.751582	0.0590211	-0.165204	0.972727	-0.803417	0.307308	-0.803417	0.307308
ATF1	-0.404571	0.32506	-1.82788	0.00222835	-1.82788	0.00222835	-0.254062	0.298873	-0.855648	0.161718	-0.855648	0.161718	0.237296	0.972727	1.07681	0.173916	1.07681	0.173916
ATG12	0.00686068	0.980954	-1.02115	0.0151862	-1.02115	0.0151862	-0.0308892	0.899544	-0.0727732	0.873443	-0.0727732	0.873443	0.114342	0.980068	0.612963	0.249182	0.612963	0.249182
ATG4B	-0.218901	0.411709	0.561255	0.139261	0.561255	0.139261	0.0552713	0.772587	0.707176	0.219793	0.707176	0.219793	0.0996688	0.987552	-0.810249	0.194756	-0.810249	0.194756
ATG4D	-0.260192	0.358508	0.720564	0.104573	0.720564	0.104573	0.296585	0.533746	1.29703	0.109273	1.29703	0.109273	0.286882	0.972727	-0.103667	0.850789	-0.103667	0.850789
ATOX1	0.0906235	0.783865	1.21429	0.01331	1.21429	0.01331	-0.0922156	0.547221	0.669476	0.156457	0.669476	0.156457	0.188136	0.972727	-0.347666	0.513499	-0.347666	0.513499
ATP5D	-0.063114	0.838577	0.758548	0.0797458	0.758548	0.0797458	0.18256	0.496009	0.95992	0.0545311	0.95992	0.0545311	0.285889	0.972727	-0.44834	0.408394	-0.44834	0.408394
ATP5G1	0.0255492	0.935077	0.606751	0.14744	0.606751	0.14744	0.070854	0.783422	0.909309	0.0350917	0.909309	0.0350917	0.333037	0.972727	-0.064522	0.904218	-0.064522	0.904218
ATP5G3	0.371692	0.183571	0.932014	0.0350362	0.932014	0.0350362	0.166956	0.429418	0.89269	0.0936458	0.89269	0.0936458	0.204865	0.972727	-0.464107	0.382952	-0.464107	0.382952
ATP5J2	-0.0700582	0.83783	0.474822	0.300599	0.474822	0.300599	-0.047362	0.823442	0.609282	0.167653	0.609282	0.167653	0.168998	0.972727	-0.10625	0.857514	-0.10625	0.857514
ATP6V0C	0.584392	0.0642685	1.36021	0.00691932	1.36021	0.00691932	0.643441	0.1813	1.24528	0.0421781	1.24528	0.0421781	0.241735	0.972727	-0.238638	0.645531	-0.238638	0.645531
ATP6V1B2	0.318048	0.160706	-0.107946	0.81326	-0.107946	0.81326	0.380952	0.187777	0.333651	0.436195	0.333651	0.436195	-0.317357	0.972727	0.138956	0.803541	0.138956	0.803541
ATP6V1E1	0.928987	0.00697404	0.741865	0.0870794	0.741865	0.0870794	0.101648	0.58046	-0.0886894	0.810215	-0.0886894	0.810215	-0.0886743	0.98507	-0.0785681	0.883851	-0.0785681	0.883851
ATP6V1F	0.278154	0.331247	1.13604	0.0214913	1.13604	0.0214913	0.138345	0.450737	0.924319	0.0574491	0.924319	0.0574491	0.195359	0.972727	-0.396594	0.478041	-0.396594	0.478041
ATRN	0.534852	0.161699	-0.331665	0.455915	-0.331665	0.455915	0.110372	0.699552	-0.497272	0.279332	-0.497272	0.279332	-0.0517245	0.992557	0.652676	0.295156	0.652676	0.295156
AURKAIP1	-0.133565	0.683387	0.703702	0.108528	0.703702	0.108528	-0.114424	0.64574	0.99841	0.016953	0.99841	0.016953	0.308701	0.972727	-0.383078	0.482641	-0.383078	0.482641
AVEN	-0.903154	0.0136963	-0.669489	0.0786634	-0.669489	0.0786634	0.0476845	0.889483	0.226423	0.615093	0.226423	0.615093	0.409892	0.972727	-0.0592653	0.900458	-0.0592653	0.900458
B3GALT4	0.257452	0.421632	1.44316	0.00461955	1.44316	0.00461955	NA	NA	NA	NA	NA	NA	-0.210881	0.972727	-0.889675	0.189385	-0.889675	0.189385
BAD	0.00541913	0.987081	1.07585	0.0269289	1.07585	0.0269289	-0.0751418	0.766698	0.71178	0.0640761	0.71178	0.0640761	0.327036	0.972727	-0.226183	0.683741	-0.226183	0.683741
BAK1	0.106444	0.684279	0.831731	0.0683381	0.831731	0.0683381	-0.554375	0.342159	0.923519	0.12337	0.923519	0.12337	0.173796	0.972727	-0.1227	0.825034	-0.1227	0.825034
BAMBI	1.16666	0.0492047	1.04116	0.0195003	1.04116	0.0195003	0.276037	0.478801	1.13397	0.0521068	1.13397	0.0521068	0.162629	0.992554	0.278249	0.573866	0.278249	0.573866
BANF1	-0.646747	0.0470888	-0.260591	0.560329	-0.260591	0.560329	-0.192257	0.321247	0.404012	0.44503	0.404012	0.44503	0.213063	0.972727	-0.260346	0.645962	-0.260346	0.645962
BAP1	-0.429054	0.114685	0.137052	0.762286	0.137052	0.762286	-0.100369	0.566677	0.420314	0.328697	0.420314	0.328697	0.225215	0.972727	-0.109952	0.8428	-0.109952	0.8428
BBC3	0.144222	0.619939	0.733041	0.105544	0.733041	0.105544	0.00919667	0.987335	1.27302	0.0650669	1.27302	0.0650669	0.0829059	0.992554	-0.435911	0.442788	-0.435911	0.442788
BCAS4	0.734045	0.024837	1.38662	0.00828162	1.38662	0.00828162	0.146272	0.453149	0.798763	0.0738511	0.798763	0.0738511	0.003271	0.998899	-0.606819	0.308539	-0.606819	0.308539
BCAT2	0.734255	0.0261854	2.16826	0.000418179	2.16826	0.000418179	-0.154966	0.497815	0.185812	0.684373	0.185812	0.684373	0.0899267	0.990542	-0.900314	0.184742	-0.900314	0.184742
BCKDK	0.435306	0.107984	1.29948	0.0106535	1.29948	0.0106535	0.23239	0.252456	1.05384	0.0497481	1.05384	0.0497481	0.0481926	0.992557	-0.614864	0.299411	-0.614864	0.299411
BCL2L1	0.288569	0.262371	0.82416	0.0701624	0.82416	0.0701624	0.0587136	0.700254	0.508072	0.22242	0.508072	0.22242	0.0369439	0.992557	-0.424696	0.447562	-0.424696	0.447562
BCL2L12	0.295193	0.298078	0.980883	0.0426938	0.980883	0.0426938	NA	NA	NA	NA	NA	NA	0.272521	0.972727	-0.359268	0.527032	-0.359268	0.527032
BCL7B	-0.569974	0.100257	-0.182921	0.648368	-0.182921	0.648368	-0.0961316	0.524612	0.572073	0.224221	0.572073	0.224221	0.329667	0.972727	0.325301	0.517227	0.325301	0.517227
BCL7C	-0.0996102	0.769894	1.03923	0.0329542	1.03923	0.0329542	-0.0653115	0.894224	-0.353298	0.325952	-0.353298	0.325952	0.437488	0.972727	-0.220711	0.696864	-0.220711	0.696864
BCS1L	-0.367542	0.185667	0.590297	0.114882	0.590297	0.114882	0.0511413	0.797746	0.810055	0.109732	0.810055	0.109732	0.325833	0.972727	-0.572497	0.272443	-0.572497	0.272443
BDH1	-0.0909887	0.729432	0.190509	0.603799	0.190509	0.603799	NA	NA	NA	NA	NA	NA	0.212844	0.972727	-0.429067	0.372114	-0.429067	0.372114
BECN1	0.26364	0.244146	-0.710991	0.108342	-0.710991	0.108342	0.102035	0.60216	-0.570776	0.152465	-0.570776	0.152465	-0.126527	0.972727	0.678715	0.270433	0.678715	0.270433
BET1	0.531691	0.105439	-1.06672	0.0244421	-1.06672	0.0244421	0.0453484	0.820282	-0.129836	0.736169	-0.129836	0.736169	-0.246924	0.972727	0.808177	0.217263	0.808177	0.217263
BET1L	0.129838	0.581547	0.876252	0.0583208	0.876252	0.0583208	0.000933173	0.99654	0.247715	0.603221	0.247715	0.603221	-0.0185439	0.995148	-0.243859	0.659873	-0.243859	0.659873
BEX2	0.608202	0.0561136	0.480003	0.199424	0.480003	0.199424	0.221478	0.295409	0.422885	0.221658	0.422885	0.221658	-0.207135	0.972727	-0.547144	0.293897	-0.547144	0.293897
BGLAP	-0.0955414	0.871699	-0.443488	0.386674	-0.443488	0.386674	NA	NA	NA	NA	NA	NA	0.397892	0.972727	-0.135924	0.836596	-0.135924	0.836596
BIK	2.07929	0.00460087	3.09734	9.19505e-05	3.09734	9.19505e-05	NA	NA	NA	NA	NA	NA	-0.187908	0.984012	-1.24014	0.160623	-1.24014	0.160623
BLOC1S1	0.0779979	0.797235	0.661396	0.131047	0.661396	0.131047	-0.187515	0.364059	0.629814	0.117157	0.629814	0.117157	0.131625	0.979877	-0.125392	0.819868	-0.125392	0.819868
BLOC1S2	0.721115	0.0314487	-0.167305	0.714206	-0.167305	0.714206	0.0945996	0.689047	0.344367	0.419085	0.344367	0.419085	-0.0271582	0.994406	1.0138	0.184172	1.0138	0.184172
BLVRB	2.50649	0.000241674	3.44266	2.29231e-05	3.44266	2.29231e-05	-0.136534	0.646631	1.08838	0.0182617	1.08838	0.0182617	-0.0831418	0.990269	-1.34012	0.134655	-1.34012	0.134655
BNIP3	0.700324	0.0210147	0.322777	0.390692	0.322777	0.390692	0.364975	0.0761684	0.330335	0.347347	0.330335	0.347347	0.00201997	0.999144	-0.00732391	0.990019	-0.00732391	0.990019
BOLA1	-0.366977	0.149286	0.22465	0.584203	0.22465	0.584203	0.074762	0.780503	0.981483	0.0326556	0.981483	0.0326556	0.0582565	0.992554	-0.551758	0.323966	-0.551758	0.323966
BOLA3	0.248923	0.402099	0.0111245	0.983035	0.0111245	0.983035	0.00718118	0.975056	0.161985	0.6863	0.161985	0.6863	0.111086	0.987552	0.709315	0.29411	0.709315	0.29411
BPGM	0.729314	0.0254686	-0.741537	0.113936	-0.741537	0.113936	-0.179526	0.279037	0.4488	0.364641	0.4488	0.364641	-0.13391	0.972727	0.602608	0.332704	0.602608	0.332704
BRI3	0.653103	0.0513763	1.90929	0.00104883	1.90929	0.00104883	-0.151983	0.561748	0.6795	0.0982424	0.6795	0.0982424	0.313145	0.972727	-0.241866	0.637304	-0.241866	0.637304
BRMS1	-0.54132	0.112797	0.335873	0.424778	0.335873	0.424778	-0.0130312	0.961876	0.546289	0.167163	0.546289	0.167163	0.413063	0.972727	-0.392576	0.469895	-0.392576	0.469895
BTBD6	-0.182455	0.489599	0.168514	0.697863	0.168514	0.697863	0.0885551	0.60155	0.94157	0.0294079	0.94157	0.0294079	0.362702	0.972727	0.202343	0.708006	0.202343	0.708006
BUD31	-0.194226	0.603016	-0.0303881	0.940656	-0.0303881	0.940656	0.0616898	0.749834	-0.0758537	0.860504	-0.0758537	0.860504	-0.0171112	0.996813	-0.0726471	0.882217	-0.0726471	0.882217
BYSL	-0.532493	0.0708441	0.256379	0.484983	0.256379	0.484983	0.240138	0.367102	0.531624	0.193683	0.531624	0.193683	0.151655	0.972727	-0.627978	0.245917	-0.627978	0.245917
C10orf10	1.15514	0.00589503	1.5581	0.00317936	1.5581	0.00317936	0.0545734	0.756831	0.495461	0.433031	0.495461	0.433031	-0.522473	0.972727	-1.01983	0.169049	-1.01983	0.169049
C11orf24	0.307293	0.218444	0.602452	0.144365	0.602452	0.144365	0.405394	0.204705	0.154302	0.778686	0.154302	0.778686	-0.00986228	0.997152	-0.0656804	0.900821	-0.0656804	0.900821
C12orf10	-0.295349	0.285784	0.760707	0.0558481	0.760707	0.0558481	0.146651	0.397374	1.02268	0.0377305	1.02268	0.0377305	0.23898	0.972727	-0.781424	0.201283	-0.781424	0.201283
C12orf43	-0.500153	0.0570651	-0.55273	0.140882	-0.55273	0.140882	-0.0147641	0.94118	-0.0417004	0.915773	-0.0417004	0.915773	0.17341	0.972727	0.190195	0.685461	0.190195	0.685461
C12orf45	0.126609	0.712483	-0.674057	0.0880797	-0.674057	0.0880797	0.140866	0.583949	-0.10495	0.81055	-0.10495	0.81055	0.0126482	0.997152	0.222115	0.646185	0.222115	0.646185
C12orf49	0.319822	0.161886	0.414691	0.261306	0.414691	0.261306	0.131421	0.663154	0.0818638	0.798699	0.0818638	0.798699	-0.0213914	0.994516	0.268364	0.567384	0.268364	0.567384
C12orf57	-1.07615	0.0180053	-0.316402	0.483192	-0.316402	0.483192	-0.0729939	0.647217	0.614976	0.164154	0.614976	0.164154	0.476999	0.972727	-0.26781	0.640549	-0.26781	0.640549
C14orf1	0.478869	0.0744582	0.949862	0.034013	0.949862	0.034013	0.0756464	0.66805	0.595774	0.219946	0.595774	0.219946	0.022751	0.994683	-0.0611947	0.907965	-0.0611947	0.907965
C14orf2	-0.229379	0.537289	-0.0335387	0.939157	-0.0335387	0.939157	0.0216662	0.88839	0.730984	0.14382	0.730984	0.14382	0.262618	0.972727	0.227148	0.661021	0.227148	0.661021
C16orf70	-0.543527	0.0455353	-0.859744	0.0320389	-0.859744	0.0320389	-0.0238436	0.902091	-0.530695	0.232398	-0.530695	0.232398	0.15005	0.972727	0.332358	0.476675	0.332358	0.476675
C19orf12	0.0348781	0.885877	0.0438884	0.90977	0.0438884	0.90977	0.249631	0.203206	-0.13343	0.69671	-0.13343	0.69671	0.0356504	0.992557	0.268667	0.559406	0.268667	0.559406
C19orf24	0.18943	0.608746	1.40108	0.00593209	1.40108	0.00593209	-0.0456681	0.790063	0.846074	0.0691144	0.846074	0.0691144	0.3767	0.972727	-0.123011	0.813286	-0.123011	0.813286
C19orf25	-0.360493	0.256127	0.601325	0.159228	0.601325	0.159228	0.0691849	0.780228	0.714721	0.103943	0.714721	0.103943	0.419039	0.972727	0.109209	0.840258	0.109209	0.840258
C19orf43	-0.638476	0.0718209	0.249342	0.569487	0.249342	0.569487	0.266346	0.62355	0.646275	0.292146	0.646275	0.292146	0.381183	0.972727	-0.221814	0.689376	-0.221814	0.689376
C1orf122	-0.0666509	0.856072	0.748538	0.0983933	0.748538	0.0983933	0.129186	0.644488	0.869348	0.109147	0.869348	0.109147	0.324208	0.972727	-0.176793	0.755974	-0.176793	0.755974
C1orf43	0.0454257	0.87464	0.71193	0.0697633	0.71193	0.0697633	0.0189611	0.902068	0.136039	0.760799	0.136039	0.760799	0.0586958	0.992554	0.0737125	0.879232	0.0737125	0.879232
C1orf50	-0.11077	0.674563	0.333562	0.365235	0.333562	0.365235	0.0341875	0.86322	0.368476	0.43937	0.368476	0.43937	0.176708	0.972727	-0.13559	0.776935	-0.13559	0.776935
C1orf56	0.814914	0.0748719	1.46159	0.00302577	1.46159	0.00302577	-0.25578	0.479683	0.63798	0.154636	0.63798	0.154636	0.40253	0.972727	-0.0190108	0.970404	-0.0190108	0.970404
C1QBP	-0.193174	0.481868	-0.112264	0.777472	-0.112264	0.777472	0.0623724	0.729968	0.500491	0.34225	0.500491	0.34225	0.163428	0.972727	-0.129163	0.791803	-0.129163	0.791803
C20orf24	0.238915	0.462042	0.817605	0.0725912	0.817605	0.0725912	NA	NA	NA	NA	NA	NA	0.31356	0.972727	-0.0411766	0.941984	-0.0411766	0.941984
C6orf136	-0.307573	0.301543	0.31801	0.389204	0.31801	0.389204	NA	NA	NA	NA	NA	NA	0.317165	0.972727	-0.582171	0.272399	-0.582171	0.272399
C8orf33	-0.590981	0.0405877	-0.790465	0.0689431	-0.790465	0.0689431	0.0404835	0.855602	0.22781	0.502152	0.22781	0.502152	0.153738	0.972727	0.274302	0.600731	0.274302	0.600731
C9orf16	-0.44004	0.182064	0.851644	0.0508142	0.851644	0.0508142	-0.0345585	0.890277	0.691372	0.146632	0.691372	0.146632	0.3572	0.972727	-0.428357	0.418325	-0.428357	0.418325
C9orf78	0.384815	0.167458	-0.518475	0.172751	-0.518475	0.172751	-0.146613	0.546422	-0.126425	0.775039	-0.126425	0.775039	-0.0862464	0.992554	0.512836	0.32216	0.512836	0.32216
C9orf9	-0.658172	0.0212549	0.533101	0.220567	0.533101	0.220567	0.196108	0.274431	0.668636	0.298378	0.668636	0.298378	0.249418	0.972727	-0.831497	0.217263	-0.831497	0.217263
CA2	0.371866	0.135457	-0.340386	0.398468	-0.340386	0.398468	0.0337949	0.919287	-0.53963	0.220282	-0.53963	0.220282	-0.384948	0.972727	0.213163	0.678985	0.213163	0.678985
CALM3	-0.250915	0.337925	0.215519	0.636543	0.215519	0.636543	0.309064	0.256444	0.415128	0.359164	0.415128	0.359164	0.146348	0.972727	-0.203003	0.725382	-0.203003	0.725382
CAPG	-0.491549	0.345365	0.532241	0.25116	0.532241	0.25116	-0.655652	0.0995228	0.798174	0.204263	0.798174	0.204263	0.140827	0.992554	-0.522786	0.391535	-0.522786	0.391535
CAPNS1	0.465122	0.0893945	1.20037	0.0121379	1.20037	0.0121379	0.396025	0.20236	0.329113	0.438152	0.329113	0.438152	0.168727	0.972727	-0.671602	0.254808	-0.671602	0.254808
CAPS	0.517755	0.129964	0.610154	0.212147	0.610154	0.212147	NA	NA	NA	NA	NA	NA	-0.263086	0.972727	-0.454677	0.468201	-0.454677	0.468201
CAPZB	-0.259406	0.270263	-0.157757	0.672545	-0.157757	0.672545	0.022735	0.930205	-0.0156838	0.963792	-0.0156838	0.963792	0.0483935	0.992557	-0.352756	0.453968	-0.352756	0.453968
CARHSP1	-0.17079	0.573044	0.503413	0.256023	0.503413	0.256023	-0.297173	0.159048	0.857528	0.060546	0.857528	0.060546	0.170425	0.972727	-0.163834	0.775488	-0.163834	0.775488
CARM1	-0.427333	0.117588	-0.140658	0.738667	-0.140658	0.738667	0.0285321	0.914383	0.579644	0.259666	0.579644	0.259666	0.136293	0.972727	-0.50963	0.34963	-0.50963	0.34963
CBS	-0.148194	0.590875	0.293274	0.425262	0.293274	0.425262	NA	NA	NA	NA	NA	NA	0.0857717	0.992554	-0.533029	0.300473	-0.533029	0.300473
CBX5	-0.502047	0.184147	-1.50137	0.00863442	-1.50137	0.00863442	-0.0193783	0.897711	-0.655978	0.147212	-0.655978	0.147212	-0.0765044	0.992554	0.703396	0.287873	0.703396	0.287873
CCDC43	0.435071	0.125341	-0.846508	0.0523432	-0.846508	0.0523432	0.031945	0.864265	-0.447252	0.434481	-0.447252	0.434481	-0.172634	0.972727	0.648268	0.268711	0.648268	0.268711
CCDC8	0.0640833	0.819888	0.268718	0.471034	0.268718	0.471034	NA	NA	NA	NA	NA	NA	-0.276982	0.972727	-0.498024	0.329121	-0.498024	0.329121
CCDC84	0.399276	0.105828	-0.00144883	0.997684	-0.00144883	0.997684	-0.398316	0.170332	-0.011028	0.976798	-0.011028	0.976798	0.0701624	0.992554	0.334097	0.505901	0.334097	0.505901
CCHCR1	0.0352172	0.908165	0.544992	0.160079	0.544992	0.160079	NA	NA	NA	NA	NA	NA	-0.0370607	0.992557	-0.706334	0.226481	-0.706334	0.226481
CCM2	0.271321	0.297431	1.04207	0.0247134	1.04207	0.0247134	0.170306	0.461811	0.80913	0.0527534	0.80913	0.0527534	-0.00341331	0.998899	-0.645993	0.274171	-0.645993	0.274171
CCNI	-0.0904191	0.693664	-0.781403	0.077498	-0.781403	0.077498	0.716818	0.284367	-0.43363	0.389728	-0.43363	0.389728	-0.04616	0.992554	0.633805	0.287696	0.633805	0.287696
CD2BP2	-0.282313	0.307666	0.579987	0.131667	0.579987	0.131667	0.0272501	0.921105	0.831659	0.0532761	0.831659	0.0532761	0.232409	0.972727	-0.547028	0.298531	-0.547028	0.298531
CD3EAP	-0.100755	0.70368	0.0701986	0.86062	0.0701986	0.86062	-0.143558	0.582166	0.0997533	0.803988	0.0997533	0.803988	-0.0252695	0.994406	-0.415729	0.398439	-0.415729	0.398439
CD99L2	-0.26217	0.276445	0.527698	0.197041	0.527698	0.197041	0.172282	0.407304	0.60924	0.214873	0.60924	0.214873	0.0552577	0.992554	-0.49276	0.364135	-0.49276	0.364135
CDC25B	-0.741529	0.0297695	0.155741	0.697297	0.155741	0.697297	-0.107824	0.638109	0.0311397	0.931778	0.0311397	0.931778	0.296173	0.972727	-0.355938	0.476011	-0.355938	0.476011
CDC34	-0.010529	0.97103	0.867745	0.0592214	0.867745	0.0592214	0.595584	0.458164	0.640257	0.335807	0.640257	0.335807	0.131559	0.974689	-0.466781	0.409476	-0.466781	0.409476
CDC37	-0.108343	0.703326	0.41486	0.276792	0.41486	0.276792	-0.0173532	0.95516	0.485307	0.1973	0.485307	0.1973	0.178294	0.972727	-0.589537	0.278438	-0.589537	0.278438
CDC37L1	0.122527	0.837705	-1.70554	0.00216834	-1.70554	0.00216834	-0.225002	0.322046	-0.0881602	0.83842	-0.0881602	0.83842	0.327094	0.972727	1.39427	0.134655	1.39427	0.134655
CDC42	0.0705313	0.762096	-0.577484	0.151168	-0.577484	0.151168	0.288131	0.0792702	0.086888	0.786956	0.086888	0.786956	-0.0584751	0.992554	-0.0214953	0.968328	-0.0214953	0.968328
CDC42EP1	1.49199	0.00148941	2.35974	0.000823987	2.35974	0.000823987	0.349161	0.541766	0.277366	0.670622	0.277366	0.670622	0.0707242	0.992554	-0.355465	0.557138	-0.355465	0.557138
CDC42EP5	3.92034	0.000311682	5.21175	7.29503e-05	5.21175	7.29503e-05	NA	NA	NA	NA	NA	NA	-0.555844	0.972727	-1.38108	0.221113	-1.38108	0.221113
CDCA4	-0.317036	0.244782	-0.0504819	0.896352	-0.0504819	0.896352	NA	NA	NA	NA	NA	NA	0.216009	0.972727	-0.117926	0.799995	-0.117926	0.799995
CDH4	0.172506	0.494711	0.196263	0.619025	0.196263	0.619025	-0.239754	0.480643	-0.0860142	0.887012	-0.0860142	0.887012	0.0559168	0.992554	0.151763	0.762877	0.151763	0.762877
CDK2	0.104282	0.672106	-0.470337	0.242939	-0.470337	0.242939	NA	NA	NA	NA	NA	NA	0.077902	0.992554	0.17291	0.739152	0.17291	0.739152
CDK2AP2	0.462465	0.0901926	0.972909	0.0351773	0.972909	0.0351773	-0.114733	0.587739	0.622023	0.261507	0.622023	0.261507	0.116919	0.977929	-0.18236	0.737206	-0.18236	0.737206
CDK4	-0.308406	0.30148	0.314369	0.457546	0.314369	0.457546	-0.201985	0.471512	0.445022	0.374658	0.445022	0.374658	0.33219	0.972727	-0.118869	0.826727	-0.118869	0.826727
CDK5R1	-0.711916	0.0388569	-1.08499	0.0135258	-1.08499	0.0135258	0.0626257	0.717988	0.337203	0.388889	0.337203	0.388889	0.116641	0.984012	0.403506	0.409264	0.403506	0.409264
CDK5RAP3	-0.8395	0.0153483	-0.22407	0.536764	-0.22407	0.536764	-0.133103	0.65446	0.341912	0.422255	0.341912	0.422255	0.0791805	0.992554	-0.498345	0.317378	-0.498345	0.317378
CDKN1A	0.839595	0.0164918	1.58108	0.00512328	1.58108	0.00512328	-0.353969	0.325186	0.194625	0.724854	0.194625	0.724854	0.0706404	0.992554	-0.553391	0.355307	-0.553391	0.355307
CDKN2A	5.45175	6.8045e-05	6.27968	3.96599e-07	6.27968	3.96599e-07	NA	NA	NA	NA	NA	NA	0.133364	0.979877	-0.390264	0.424941	-0.390264	0.424941
CDR2L	0.0636466	0.836244	0.783978	0.0993009	0.783978	0.0993009	0.470378	0.163066	0.630671	0.306588	0.630671	0.306588	0.102113	0.990269	-0.457312	0.441781	-0.457312	0.441781
CDT1	-1.15739	0.00962931	-0.0570512	0.88741	-0.0570512	0.88741	0.441538	0.325597	0.264834	0.528014	0.264834	0.528014	0.468374	0.972727	-0.399758	0.416957	-0.399758	0.416957
CECR5	-0.945662	0.0115561	-0.159688	0.695725	-0.159688	0.695725	-0.111185	0.601377	1.07384	0.0426961	1.07384	0.0426961	0.215174	0.972727	-0.534319	0.325842	-0.534319	0.325842
CFL1	-0.326005	0.257205	0.225352	0.585336	0.225352	0.585336	0.213915	0.303003	0.820485	0.0842958	0.820485	0.0842958	0.31489	0.972727	-0.578201	0.308568	-0.578201	0.308568
CHCHD1	-0.0505846	0.900489	0.458584	0.255242	0.458584	0.255242	0.0199179	0.905808	0.766027	0.126206	0.766027	0.126206	0.149232	0.984251	-0.0124796	0.983692	-0.0124796	0.983692
CHCHD3	0.0355061	0.88275	-1.08922	0.0169626	-1.08922	0.0169626	-0.142237	0.561647	0.334741	0.402198	0.334741	0.402198	-0.068539	0.992554	0.519529	0.334173	0.519529	0.334173
CHCHD4	-0.342869	0.174048	-0.953049	0.0231578	-0.953049	0.0231578	0.18816	0.47923	-0.200084	0.615254	-0.200084	0.615254	-0.225305	0.972727	0.42277	0.387478	0.42277	0.387478
CHCHD5	0.225553	0.446147	1.09066	0.020359	1.09066	0.020359	-0.3114	0.33854	0.523863	0.232417	0.523863	0.232417	0.23548	0.972727	-0.231793	0.658904	-0.231793	0.658904
CHCHD6	-0.310265	0.205499	0.298791	0.501299	0.298791	0.501299	0.0530687	0.856538	1.03391	0.0295508	1.03391	0.0295508	-0.0291259	0.992557	-0.696135	0.271835	-0.696135	0.271835
CHCHD7	0.0910942	0.785194	-0.966877	0.0210125	-0.966877	0.0210125	-0.187203	0.497033	-0.133484	0.741646	-0.133484	0.741646	0.12543	0.984251	1.07347	0.154983	1.07347	0.154983
CHIC2	0.148759	0.6688	-0.610803	0.124186	-0.610803	0.124186	0.0544754	0.861438	0.323938	0.466371	0.323938	0.466371	0.171776	0.972727	0.706784	0.228888	0.706784	0.228888
CHMP2A	0.115919	0.643031	0.567013	0.164768	0.567013	0.164768	-0.102914	0.66698	0.713904	0.066619	0.713904	0.066619	0.0150264	0.99545	-0.844025	0.201283	-0.844025	0.201283
CHMP4A	-0.18245	0.431213	0.0852926	0.839559	0.0852926	0.839559	0.0400646	0.89495	-0.0538718	0.884349	-0.0538718	0.884349	-0.0700296	0.992554	-0.264582	0.601097	-0.264582	0.601097
CHMP7	-0.0312406	0.900296	-0.210563	0.585758	-0.210563	0.585758	0.117286	0.540901	0.131254	0.780759	0.131254	0.780759	-0.233846	0.972727	-0.366101	0.458846	-0.366101	0.458846
CHST11	0.0443845	0.853323	-0.0231114	0.955712	-0.0231114	0.955712	-0.0280861	0.864664	-0.268116	0.489086	-0.268116	0.489086	0.133398	0.972727	0.216536	0.665416	0.216536	0.665416
CHST2	-0.607892	0.0344394	-0.381964	0.358265	-0.381964	0.358265	0.10906	0.571954	1.13985	0.0353508	1.13985	0.0353508	0.233593	0.972727	0.0842549	0.876841	0.0842549	0.876841
CHTF18	-0.412966	0.16913	0.367858	0.316386	0.367858	0.316386	NA	NA	NA	NA	NA	NA	0.357568	0.972727	-0.344489	0.467992	-0.344489	0.467992
CIAPIN1	-0.225143	0.361412	0.459173	0.204512	0.459173	0.204512	0.161919	0.485858	0.409741	0.374572	0.409741	0.374572	0.130792	0.972727	-0.610991	0.24907	-0.610991	0.24907
CIB1	0.158331	0.521457	0.725386	0.113118	0.725386	0.113118	-0.296154	0.185452	0.793579	0.0548227	0.793579	0.0548227	0.0947758	0.986152	-0.289116	0.608816	-0.289116	0.608816
CIB2	-0.434309	0.146174	0.812016	0.0734096	0.812016	0.0734096	0.5458	0.208953	0.868262	0.109573	0.868262	0.109573	0.229452	0.972727	-0.362375	0.51145	-0.362375	0.51145
CKS2	0.0202529	0.954082	-0.323536	0.387251	-0.323536	0.387251	-0.286691	0.403984	0.169024	0.675421	0.169024	0.675421	0.000729259	0.999144	0.265322	0.577745	0.265322	0.577745
CLCF1	0.32936	0.198303	0.845017	0.041607	0.845017	0.041607	NA	NA	NA	NA	NA	NA	-0.0262496	0.994406	-0.558747	0.29636	-0.558747	0.29636
CLIC1	0.850747	0.0124406	1.45	0.00440358	1.45	0.00440358	NA	NA	NA	NA	NA	NA	-0.127302	0.972727	-1.05151	0.163944	-1.05151	0.163944
CLN8	1.87777	0.000509671	1.85591	0.00114194	1.85591	0.00114194	NA	NA	NA	NA	NA	NA	-0.296721	0.972727	-0.307632	0.542139	-0.307632	0.542139
CLPP	-0.0309983	0.922279	0.697418	0.0956469	0.697418	0.0956469	-0.101741	0.655964	0.876146	0.0581883	0.876146	0.0581883	0.156437	0.972727	-0.68209	0.250312	-0.68209	0.250312
CLTA	-0.0621217	0.844949	0.256169	0.506245	0.256169	0.506245	0.25447	0.452111	0.669234	0.168586	0.669234	0.168586	0.216955	0.972727	-0.468374	0.36138	-0.468374	0.36138
CLTB	0.428454	0.142819	1.27228	0.0132023	1.27228	0.0132023	0.203054	0.637815	1.04133	0.0594934	1.04133	0.0594934	0.322011	0.972727	-0.233607	0.674704	-0.233607	0.674704
CMTM7	-0.0318026	0.911853	0.611634	0.142122	0.611634	0.142122	-1.28362	0.0691586	-0.262453	0.762407	-0.262453	0.762407	0.235414	0.972727	-0.106512	0.839576	-0.106512	0.839576
CNN2	-0.091156	0.750135	0.712914	0.0865698	0.712914	0.0865698	-0.792923	0.0539953	-0.537898	0.263332	-0.537898	0.263332	0.397222	0.972727	-0.617586	0.277681	-0.617586	0.277681
CNN3	0.446337	0.101796	-0.545879	0.282597	-0.545879	0.282597	-0.388112	0.245979	0.040471	0.924074	0.040471	0.924074	-0.0490792	0.992557	0.492157	0.453869	0.492157	0.453869
CNOT7	-0.199882	0.530945	-1.17605	0.0134032	-1.17605	0.0134032	0.0187546	0.905383	-0.775619	0.0832249	-0.775619	0.0832249	0.0857815	0.992554	1.09005	0.161367	1.09005	0.161367
COASY	0.356173	0.153144	1.11405	0.0162427	1.11405	0.0162427	0.0204373	0.914542	0.502935	0.311546	0.502935	0.311546	-0.0851214	0.990269	-0.645487	0.265142	-0.645487	0.265142
COG4	-0.328252	0.17942	0.318496	0.386212	0.318496	0.386212	0.119221	0.524526	0.171368	0.662787	0.171368	0.662787	0.0337739	0.992557	-0.624005	0.250065	-0.624005	0.250065
COL5A2	2.64547	0.00108497	1.56671	0.00576084	1.56671	0.00576084	0.316169	0.285161	0.424389	0.366241	0.424389	0.366241	-0.247846	0.972727	0.433497	0.456494	0.433497	0.456494
COMMD5	-0.114433	0.715776	0.7752	0.0740754	0.7752	0.0740754	-0.0365592	0.886378	1.25968	0.021548	1.25968	0.021548	0.368719	0.972727	-0.34648	0.511899	-0.34648	0.511899
COMMD6	-0.45606	0.174128	0.194791	0.6339	0.194791	0.6339	-0.231058	0.296269	0.581743	0.210449	0.581743	0.210449	-0.0824215	0.992554	-0.489405	0.362995	-0.489405	0.362995
COMTD1	2.45883	0.000397735	3.30972	2.89293e-05	3.30972	2.89293e-05	0.0892334	0.877244	1.01137	0.177778	1.01137	0.177778	0.156889	0.972727	-0.792848	0.213606	-0.792848	0.213606
COPE	-0.264233	0.337641	0.478859	0.237973	0.478859	0.237973	-0.239628	0.352557	0.798231	0.0778244	0.798231	0.0778244	0.247025	0.972727	-0.745916	0.227034	-0.745916	0.227034
COPS2	-0.285126	0.557031	-1.30115	0.0109243	-1.30115	0.0109243	0.121213	0.500733	-0.270679	0.503708	-0.270679	0.503708	0.192084	0.984251	0.517075	0.364597	0.517075	0.364597
COPS6	-0.396022	0.148002	0.146121	0.714094	0.146121	0.714094	-0.0202553	0.932023	0.384962	0.346698	0.384962	0.346698	0.0759764	0.992554	-0.59253	0.279945	-0.59253	0.279945
COPS7A	0.374043	0.140761	0.814867	0.0544947	0.814867	0.0544947	0.15261	0.583767	0.758727	0.0979006	0.758727	0.0979006	0.0558524	0.992554	-0.545508	0.31878	-0.545508	0.31878
COPS7B	-0.311789	0.192147	-0.0703772	0.86738	-0.0703772	0.86738	0.0626198	0.718147	-0.0648457	0.884537	-0.0648457	0.884537	0.0491061	0.992554	-0.366231	0.473043	-0.366231	0.473043
COPZ1	-0.426247	0.120049	-0.0970592	0.827566	-0.0970592	0.827566	0.0199623	0.918655	0.298729	0.477936	0.298729	0.477936	0.100125	0.985621	-0.427981	0.435594	-0.427981	0.435594
COQ9	-0.154433	0.488888	0.0905745	0.837273	0.0905745	0.837273	-0.0615078	0.788996	0.306225	0.507193	0.306225	0.507193	0.0787356	0.990269	-0.280014	0.597328	-0.280014	0.597328
CORO1A	-0.359509	0.210783	0.515205	0.160056	0.515205	0.160056	-0.0911516	0.67086	0.732401	0.204605	0.732401	0.204605	0.129919	0.979452	-0.740772	0.206536	-0.740772	0.206536
CORO1B	0.365266	0.161033	1.2456	0.00640959	1.2456	0.00640959	-0.358758	0.365486	0.113409	0.830312	0.113409	0.830312	0.0700252	0.992554	-0.853519	0.181885	-0.853519	0.181885
COTL1	-0.504911	0.0797415	0.260537	0.579315	0.260537	0.579315	-0.501534	0.042307	0.244018	0.56092	0.244018	0.56092	0.246073	0.972727	0.0405369	0.947385	0.0405369	0.947385
COX17	0.844913	0.0248425	0.835233	0.0460934	0.835233	0.0460934	-0.0890223	0.759585	0.589283	0.154518	0.589283	0.154518	-0.0678613	0.992554	-0.26796	0.586971	-0.26796	0.586971
COX5B	0.240907	0.497158	0.952192	0.0463922	0.952192	0.0463922	0.122445	0.451744	0.79448	0.0512159	0.79448	0.0512159	0.205071	0.972727	-0.280708	0.617791	-0.280708	0.617791
COX6B1	0.257102	0.420164	0.724155	0.126209	0.724155	0.126209	-0.0108126	0.940744	1.11139	0.0219989	1.11139	0.0219989	0.139444	0.980068	-0.0660324	0.912223	-0.0660324	0.912223
COX7A2	0.458912	0.200919	1.05519	0.0251505	1.05519	0.0251505	0.105101	0.509411	0.753918	0.127428	0.753918	0.127428	0.148008	0.982045	0.0953282	0.860561	0.0953282	0.860561
COX7A2L	-0.00425785	0.988228	0.712534	0.0909675	0.712534	0.0909675	0.10751	0.532021	0.842006	0.0744204	0.842006	0.0744204	0.0857487	0.991525	-0.470294	0.380398	-0.470294	0.380398
COX8A	0.347144	0.277861	1.20471	0.018924	1.20471	0.018924	0.00805816	0.974713	0.730193	0.107496	0.730193	0.107496	0.283908	0.972727	-0.16051	0.782154	-0.16051	0.782154
CPSF3L	-0.394324	0.152262	0.449844	0.22067	0.449844	0.22067	-0.120844	0.610475	0.598257	0.219468	0.598257	0.219468	0.0902018	0.990542	-0.644361	0.238833	-0.644361	0.238833
CPSF4	-0.404471	0.152547	0.275856	0.495257	0.275856	0.495257	0.23324	0.287659	0.540909	0.172699	0.540909	0.172699	0.121131	0.980068	-0.45006	0.395409	-0.45006	0.395409
CRADD	-0.658695	0.0252864	-0.810657	0.0528753	-0.810657	0.0528753	-0.215188	0.452933	0.233519	0.660912	0.233519	0.660912	-0.00750639	0.997312	-0.0829178	0.869678	-0.0829178	0.869678
CREB3	0.21847	0.411536	1.17267	0.016557	1.17267	0.016557	-0.113863	0.588732	0.63088	0.100942	0.63088	0.100942	0.240169	0.972727	-0.42784	0.435378	-0.42784	0.435378
CREM	0.450754	0.124812	-0.0474952	0.902108	-0.0474952	0.902108	-0.0178538	0.915789	-0.29622	0.42457	-0.29622	0.42457	-0.0336436	0.992557	0.569065	0.269702	0.569065	0.269702
CRIP2	-0.0254524	0.939099	0.934099	0.0339837	0.934099	0.0339837	0.126845	0.669173	0.886343	0.130996	0.886343	0.130996	0.34955	0.972727	-0.414557	0.426667	-0.414557	0.426667
CRIPT	-0.00251876	0.992214	-0.925182	0.0574671	-0.925182	0.0574671	-0.0510283	0.809753	-0.0943672	0.796118	-0.0943672	0.796118	0.115359	0.974689	0.644119	0.31015	0.644119	0.31015
CRLS1	-0.0677971	0.79192	-0.712883	0.0769516	-0.712883	0.0769516	0.384993	0.275182	0.284525	0.551395	0.284525	0.551395	0.140445	0.972727	0.315102	0.520655	0.315102	0.520655
CRYL1	0.292913	0.227213	0.806224	0.0693369	0.806224	0.0693369	-0.361639	0.143147	0.225012	0.614188	0.225012	0.614188	-0.301901	0.972727	-0.902232	0.198359	-0.902232	0.198359
CSNK1D	-0.263142	0.31054	0.249767	0.499184	0.249767	0.499184	0.0188232	0.911614	0.609772	0.122137	0.609772	0.122137	0.133144	0.972727	-0.301533	0.520204	-0.301533	0.520204
CSNK1G2	-0.264441	0.336999	0.432598	0.321285	0.432598	0.321285	-0.0149039	0.954831	0.239092	0.580455	0.239092	0.580455	0.141717	0.972727	-0.161639	0.775688	-0.161639	0.775688
CSNK2A1	0.0784721	0.732816	-0.893722	0.0544703	-0.893722	0.0544703	0.155519	0.425275	0.0797266	0.812086	0.0797266	0.812086	-0.113883	0.972727	0.496252	0.38613	0.496252	0.38613
CSNK2B	-0.235465	0.32238	0.193212	0.626286	0.193212	0.626286	NA	NA	NA	NA	NA	NA	0.0944377	0.984251	-0.254759	0.607477	-0.254759	0.607477
CSRP1	-3.15393	0.000122495	-3.92337	1.56272e-05	-3.92337	1.56272e-05	-0.349248	0.206409	0.433548	0.409617	0.433548	0.409617	-0.353781	0.972727	-0.190236	0.73783	-0.190236	0.73783
CSRP2	0.433001	0.10448	0.355964	0.340643	0.355964	0.340643	-0.0934624	0.722718	0.839207	0.0613186	0.839207	0.0613186	0.0132762	0.996178	-0.508386	0.323966	-0.508386	0.323966
CTBP1	-0.674616	0.0413633	-0.195195	0.636724	-0.195195	0.636724	-0.068927	0.822675	0.746376	0.10553	0.746376	0.10553	0.210834	0.972727	-0.241983	0.640532	-0.241983	0.640532
CTDSP2	0.12929	0.620398	0.257774	0.546177	0.257774	0.546177	-0.218375	0.291864	0.108561	0.811619	0.108561	0.811619	0.152234	0.972727	0.270327	0.61626	0.270327	0.61626
CTTN	0.93618	0.0059268	0.562288	0.20538	0.562288	0.20538	0.0401103	0.9393	0.529865	0.213306	0.529865	0.213306	-0.316861	0.972727	0.111043	0.844837	0.111043	0.844837
CUEDC2	-0.586122	0.0493342	0.319224	0.41628	0.319224	0.41628	0.000456845	0.99864	0.762741	0.0702772	0.762741	0.0702772	0.154113	0.972727	-0.927269	0.180481	-0.927269	0.180481
CUTA	0.217259	0.434735	1.02766	0.0271069	1.02766	0.0271069	NA	NA	NA	NA	NA	NA	0.259416	0.972727	-0.414709	0.441912	-0.414709	0.441912
CUTC	0.682258	0.0791825	-0.0237576	0.95703	-0.0237576	0.95703	0.047498	0.865138	0.0404758	0.936151	0.0404758	0.936151	-0.399919	0.972727	0.0793896	0.883314	0.0793896	0.883314
CXXC1	-0.90587	0.023431	-0.288944	0.470019	-0.288944	0.470019	-0.446256	0.212858	0.639035	0.157869	0.639035	0.157869	0.420195	0.972727	-0.240209	0.637494	-0.240209	0.637494
CXXC5	0.780909	0.0193989	0.110789	0.775713	0.110789	0.775713	0.224246	0.451028	0.238496	0.463662	0.238496	0.463662	-0.202577	0.972727	0.287835	0.541079	0.287835	0.541079
CYB5A	0.487166	0.0926353	0.68209	0.0862745	0.68209	0.0862745	-0.375095	0.135392	0.768063	0.110418	0.768063	0.110418	-0.0760502	0.992554	0.00256599	0.996352	0.00256599	0.996352
CYB5B	0.0484645	0.859249	-0.593994	0.14744	-0.593994	0.14744	0.0185637	0.913298	-0.235025	0.526637	-0.235025	0.526637	0.00282124	0.999087	0.436048	0.408513	0.436048	0.408513
CYB5R2	0.54373	0.115323	0.956795	0.034025	0.956795	0.034025	0.629946	0.173327	-0.0328955	0.96118	-0.0328955	0.96118	-0.0505717	0.992557	-0.559333	0.323449	-0.559333	0.323449
CYC1	-0.0205461	0.946079	0.728368	0.0712212	0.728368	0.0712212	0.442741	0.213753	1.03176	0.0938438	1.03176	0.0938438	0.219866	0.972727	-0.505063	0.3341	-0.505063	0.3341
CYFIP2	0.322658	0.190519	0.469179	0.196935	0.469179	0.196935	0.183568	0.338085	0.0343094	0.918309	0.0343094	0.918309	-0.0620923	0.992554	-0.0982636	0.832056	-0.0982636	0.832056
CYGB	1.2314	0.00376187	1.83682	0.00261252	1.83682	0.00261252	0.0062625	0.979813	1.2703	0.0080089	1.2703	0.0080089	-0.0719385	0.992554	-0.743036	0.261254	-0.743036	0.261254
CYHR1	-0.0725891	0.793029	0.613772	0.150364	0.613772	0.150364	-0.233035	0.176616	1.31571	0.0103258	1.31571	0.0103258	0.204491	0.972727	-0.341247	0.523207	-0.341247	0.523207
CYYR1	-0.438949	0.132086	-1.09007	0.0206214	-1.09007	0.0206214	-0.521404	0.193489	-0.590838	0.303467	-0.590838	0.303467	0.215665	0.972727	1.77058	0.109985	1.77058	0.109985
DAD1	0.81345	0.0433212	1.23953	0.0101742	1.23953	0.0101742	-0.144529	0.489977	0.938168	0.0814585	0.938168	0.0814585	0.107379	0.992554	-0.159025	0.759927	-0.159025	0.759927
DALRD3	-0.133541	0.584205	0.48625	0.207377	0.48625	0.207377	-0.0755452	0.664285	1.21055	0.193814	1.21055	0.193814	-0.0162298	0.99545	-0.559668	0.297046	-0.559668	0.297046
DAP	0.0443191	0.867728	0.158955	0.69029	0.158955	0.69029	-0.798747	0.00656481	-0.250274	0.500985	-0.250274	0.500985	0.0783951	0.992554	0.381963	0.446462	0.381963	0.446462
DAXX	-0.741042	0.0263595	-0.736586	0.0739924	-0.736586	0.0739924	NA	NA	NA	NA	NA	NA	0.147784	0.972727	0.18895	0.70796	0.18895	0.70796
DBI	0.17439	0.586122	0.0546511	0.891464	0.0546511	0.891464	-0.621325	0.0524143	0.140248	0.735858	0.140248	0.735858	0.101128	0.992554	0.389822	0.422905	0.389822	0.422905
DBNDD2	0.143646	0.792462	-0.130327	0.811031	-0.130327	0.811031	1.06234	0.0121434	0.745262	0.319518	0.745262	0.319518	0.326539	0.972727	0.261416	0.692837	0.261416	0.692837
DBP	-0.757088	0.0268421	-0.173973	0.682767	-0.173973	0.682767	0.251478	0.495366	1.10878	0.0330457	1.10878	0.0330457	0.0137117	0.996613	-0.586925	0.308539	-0.586925	0.308539
DCPS	-0.32507	0.20674	0.440155	0.290277	0.440155	0.290277	-0.43771	0.0359791	0.280789	0.524699	0.280789	0.524699	0.126728	0.973712	-0.559496	0.327628	-0.559496	0.327628
DCTD	-0.0551436	0.832612	0.292201	0.436426	0.292201	0.436426	-0.137786	0.644977	-0.499005	0.228656	-0.499005	0.228656	0.114434	0.977929	0.376902	0.439332	0.376902	0.439332
DCTN2	-0.0712325	0.773068	0.603794	0.109314	0.603794	0.109314	0.237201	0.187788	0.566379	0.224871	0.566379	0.224871	0.102045	0.980068	-0.696778	0.218279	-0.696778	0.218279
DCTN5	0.0921546	0.710099	-0.430174	0.276777	-0.430174	0.276777	0.124093	0.52576	-0.403185	0.295413	-0.403185	0.295413	-0.107169	0.980068	0.555211	0.311996	0.555211	0.311996
DCUN1D3	0.0913055	0.696699	-0.6431	0.0993585	-0.6431	0.0993585	0.18223	0.572804	-1.1062	0.0259787	-1.1062	0.0259787	-0.0859951	0.987552	0.788649	0.201283	0.788649	0.201283
DCUN1D5	0.213815	0.369265	-0.439642	0.231929	-0.439642	0.231929	-0.0471234	0.767735	-0.165854	0.662562	-0.165854	0.662562	-0.00572338	0.997312	0.161054	0.733456	0.161054	0.733456
DDA1	0.398386	0.141988	0.857242	0.0633519	0.857242	0.0633519	-0.134633	0.517836	0.203481	0.577378	0.203481	0.577378	0.0990183	0.987222	-0.221082	0.691487	-0.221082	0.691487
DDAH2	-0.421681	0.245946	0.0935891	0.831163	0.0935891	0.831163	NA	NA	NA	NA	NA	NA	0.203881	0.972727	-0.616931	0.291486	-0.616931	0.291486
DDIT3	1.58313	0.00206709	1.83069	0.00073629	1.83069	0.00073629	-0.0784297	0.803958	0.453475	0.307436	0.453475	0.307436	-0.610422	0.972727	-0.400564	0.40027	-0.400564	0.40027
DDT	-0.0886941	0.769894	0.750894	0.12392	0.750894	0.12392	NA	NA	NA	NA	NA	NA	0.500938	0.972727	0.031445	0.960761	0.031445	0.960761
DDX41	-0.276171	0.28945	0.319096	0.421217	0.319096	0.421217	0.000576391	0.998442	0.573133	0.163323	0.573133	0.163323	0.0769512	0.992554	-0.64348	0.264622	-0.64348	0.264622
DDX56	-0.384292	0.146432	0.364637	0.324892	0.364637	0.324892	-0.0570715	0.792506	0.702371	0.144599	0.702371	0.144599	0.194354	0.972727	-0.537497	0.300473	-0.537497	0.300473
DEAF1	-0.733832	0.0393043	0.232053	0.573566	0.232053	0.573566	0.370141	0.375528	0.585308	0.242108	0.585308	0.242108	0.151926	0.972727	-0.240432	0.644096	-0.240432	0.644096
DECR2	-0.234129	0.368702	0.570134	0.196273	0.570134	0.196273	NA	NA	NA	NA	NA	NA	0.125811	0.974689	-0.428161	0.450309	-0.428161	0.450309
DEDD	-0.441533	0.0933765	-0.170652	0.656576	-0.170652	0.656576	-0.0930351	0.682066	-0.206576	0.607176	-0.206576	0.607176	0.0274559	0.992767	0.0644036	0.895575	0.0644036	0.895575
DEDD2	-0.333274	0.302734	0.26733	0.521933	0.26733	0.521933	0.313195	0.169292	1.10797	0.0815641	1.10797	0.0815641	0.106432	0.992554	-0.532775	0.34314	-0.532775	0.34314
DENND1A	0.0634341	0.811057	0.615473	0.111337	0.615473	0.111337	-0.147693	0.513833	0.0185562	0.963404	0.0185562	0.963404	-0.208431	0.972727	-0.304001	0.524591	-0.304001	0.524591
DEXI	-0.279436	0.338284	0.522875	0.218934	0.522875	0.218934	0.222867	0.597369	1.08499	0.103664	1.08499	0.103664	0.115564	0.984251	-0.29981	0.577556	-0.29981	0.577556
DFFA	0.691226	0.0250092	1.25186	0.00890449	1.25186	0.00890449	-0.135949	0.549219	0.301334	0.388743	0.301334	0.388743	-0.214456	0.972727	-0.644668	0.260197	-0.644668	0.260197
DGAT1	0.531386	0.0680886	1.51509	0.0036814	1.51509	0.0036814	-0.0596227	0.85549	1.07607	0.0384623	1.07607	0.0384623	0.127093	0.974689	-0.523886	0.336015	-0.523886	0.336015
DGCR14	-0.512576	0.0661546	0.344942	0.365788	0.344942	0.365788	0.133527	0.634	0.419798	0.350392	0.419798	0.350392	0.257361	0.972727	-0.64738	0.250312	-0.64738	0.250312
DGKZ	-0.474431	0.120922	0.405297	0.341713	0.405297	0.341713	-0.166454	0.542726	0.577282	0.271269	0.577282	0.271269	0.23199	0.972727	-0.260133	0.633592	-0.260133	0.633592
DGUOK	-0.0347411	0.91115	0.323143	0.401914	0.323143	0.401914	0.135703	0.556007	0.84001	0.0784323	0.84001	0.0784323	0.107455	0.987552	-0.313212	0.524257	-0.313212	0.524257
DHODH	-0.629475	0.0635913	-0.0454702	0.906717	-0.0454702	0.906717	-0.276666	0.576732	1.47433	0.0061915	1.47433	0.0061915	0.0952815	0.992554	-0.699537	0.217263	-0.699537	0.217263
DHPS	-0.100963	0.7292	0.888037	0.0297847	0.888037	0.0297847	0.115521	0.547546	0.687727	0.23058	0.687727	0.23058	0.100758	0.990269	-0.883671	0.178049	-0.883671	0.178049
DNAJB2	0.797172	0.0162621	1.9256	0.00179078	1.9256	0.00179078	0.339428	0.339112	0.88033	0.0815514	0.88033	0.0815514	0.164012	0.972727	-0.681838	0.280163	-0.681838	0.280163
DNAJB6	-0.40412	0.126379	-0.919772	0.0302785	-0.919772	0.0302785	-0.0371114	0.832292	0.310452	0.445116	0.310452	0.445116	0.114983	0.979452	0.290345	0.551276	0.290345	0.551276
DNAJC8	-0.296619	0.201764	-1.07782	0.0166286	-1.07782	0.0166286	-0.0579755	0.815933	0.0752349	0.856551	0.0752349	0.856551	0.0902692	0.984251	0.362457	0.469693	0.362457	0.469693
DNASE1L1	0.600214	0.0527192	1.79756	0.00217578	1.79756	0.00217578	-0.660459	0.0605888	0.457963	0.327346	0.457963	0.327346	-0.129197	0.974689	-0.688761	0.267037	-0.688761	0.267037
DNPEP	0.388201	0.136697	1.16226	0.0133497	1.16226	0.0133497	0.128863	0.552306	0.39424	0.286062	0.39424	0.286062	0.0573944	0.992554	-0.704044	0.238018	-0.704044	0.238018
DNTTIP1	-0.452847	0.110543	0.059687	0.883467	0.059687	0.883467	0.101577	0.680161	1.23619	0.0211094	1.23619	0.0211094	0.242921	0.972727	-0.675896	0.236059	-0.675896	0.236059
DPF2	-0.753024	0.0153475	-0.307329	0.40395	-0.307329	0.40395	-0.117268	0.563959	-0.0390025	0.926183	-0.0390025	0.926183	0.12813	0.972727	-0.427333	0.380664	-0.427333	0.380664
DPM2	-0.151308	0.582771	0.799111	0.073648	0.799111	0.073648	0.00295023	0.990764	0.768417	0.112614	0.768417	0.112614	0.295282	0.972727	-0.244546	0.652187	-0.244546	0.652187
DPP7	-0.981277	0.0231512	-0.103553	0.801556	-0.103553	0.801556	-0.0687861	0.750467	0.764063	0.124874	0.764063	0.124874	0.27182	0.972727	-0.197455	0.693354	-0.197455	0.693354
DR1	0.088403	0.747857	-1.15894	0.0097153	-1.15894	0.0097153	0.069869	0.80717	-0.264722	0.453213	-0.264722	0.453213	0.074176	0.992554	0.781733	0.200155	0.781733	0.200155
DRAP1	-0.100029	0.714894	0.509313	0.252863	0.509313	0.252863	0.0333477	0.85352	0.832504	0.0324055	0.832504	0.0324055	0.0490701	0.992557	-0.443466	0.44178	-0.443466	0.44178
DRG1	-0.0651203	0.784821	0.120965	0.753033	0.120965	0.753033	0.115038	0.550675	-0.186948	0.601767	-0.186948	0.601767	-0.00535715	0.997312	-0.255426	0.58407	-0.255426	0.58407
DRG2	-0.361598	0.156009	0.374417	0.302943	0.374417	0.302943	-0.117353	0.476062	0.421515	0.333402	0.421515	0.333402	0.181022	0.972727	-0.679012	0.224587	-0.679012	0.224587
DSTN	0.638923	0.0244925	-0.401504	0.287338	-0.401504	0.287338	-0.0443665	0.782526	0.00695837	0.985857	0.00695837	0.985857	0.115775	0.972727	0.625162	0.257012	0.625162	0.257012
DUS3L	-0.741371	0.0417318	0.129339	0.743036	0.129339	0.743036	-0.526406	0.0293337	-0.28348	0.533556	-0.28348	0.533556	0.36381	0.972727	-0.360991	0.459832	-0.360991	0.459832
DUSP14	0.398509	0.122813	0.531171	0.172958	0.531171	0.172958	NA	NA	NA	NA	NA	NA	-0.0440845	0.992557	-0.351002	0.478273	-0.351002	0.478273
DVL3	-0.338419	0.193201	0.0235779	0.953883	0.0235779	0.953883	-0.240519	0.554622	-0.316058	0.463057	-0.316058	0.463057	0.0960908	0.987552	-0.15089	0.761885	-0.15089	0.761885
DYNLL2	-0.60564	0.0423181	-0.575715	0.182405	-0.575715	0.182405	0.381735	0.307075	-0.23678	0.572695	-0.23678	0.572695	0.0449717	0.992557	0.138398	0.801376	0.138398	0.801376
DYRK3	-1.12327	0.0153131	-1.57882	0.00269823	-1.57882	0.00269823	0.467333	0.281487	-0.121084	0.815912	-0.121084	0.815912	-0.23513	0.972727	0.19625	0.696955	0.19625	0.696955
EBP	0.640989	0.0498608	1.57117	0.00216089	1.57117	0.00216089	0.2145	0.495698	0.968776	0.0432263	0.968776	0.0432263	0.110696	0.984251	-0.798284	0.198952	-0.798284	0.198952
EDF1	-0.420493	0.212312	0.316049	0.449777	0.316049	0.449777	-0.00399786	0.980561	1.02107	0.0205101	1.02107	0.0205101	0.249536	0.972727	-0.618331	0.29243	-0.618331	0.29243
EFHD2	-0.735471	0.0333584	-0.162227	0.725428	-0.162227	0.725428	0.877688	0.018242	0.728406	0.154667	0.728406	0.154667	0.15716	0.972727	-0.13676	0.810967	-0.13676	0.810967
EHD3	0.347024	0.215446	-0.106051	0.786159	-0.106051	0.786159	0.476226	0.177181	0.0517114	0.900134	0.0517114	0.900134	-0.321114	0.972727	-0.215014	0.648669	-0.215014	0.648669
EI24	0.0965252	0.764662	0.657244	0.102902	0.657244	0.102902	0.469365	0.299715	0.56981	0.168113	0.56981	0.168113	0.149157	0.974689	0.0922334	0.853711	0.0922334	0.853711
EIF2B2	-0.00360675	0.989562	0.598397	0.109817	0.598397	0.109817	0.170697	0.425142	0.100273	0.801748	0.100273	0.801748	0.0446106	0.992557	-0.45966	0.348709	-0.45966	0.348709
EIF2B4	-1.23954	0.00226981	-0.504436	0.171822	-0.504436	0.171822	-0.168191	0.462531	-0.0546396	0.875118	-0.0546396	0.875118	0.139892	0.972727	-0.621479	0.247657	-0.621479	0.247657
EIF4E2	-0.00687623	0.980342	-0.316309	0.390319	-0.316309	0.390319	-0.00121623	0.995829	0.0675367	0.839941	0.0675367	0.839941	-0.145769	0.972727	0.0910972	0.847806	0.0910972	0.847806
EIF4EBP1	0.0634621	0.833515	1.08092	0.0235195	1.08092	0.0235195	-0.802976	0.0254113	0.967822	0.0504768	0.967822	0.0504768	0.0697161	0.992554	-0.483902	0.385601	-0.483902	0.385601
EIF5A	-0.0252196	0.939431	0.348609	0.421014	0.348609	0.421014	0.027373	0.9351	0.681273	0.159014	0.681273	0.159014	0.26531	0.972727	-0.135946	0.807366	-0.135946	0.807366
ELF4	2.44083	0.000669337	3.0316	0.000107853	3.0316	0.000107853	NA	NA	NA	NA	NA	NA	-0.485494	0.972727	-0.677702	0.284336	-0.677702	0.284336
ELOF1	-0.485727	0.18547	0.634533	0.139616	0.634533	0.139616	-0.0341967	0.895428	0.558001	0.19921	0.558001	0.19921	0.31447	0.972727	-0.335162	0.531757	-0.335162	0.531757
EMD	-0.273215	0.296253	0.592863	0.175318	0.592863	0.175318	0.367054	0.214686	0.168321	0.778903	0.168321	0.778903	0.186045	0.972727	-0.350778	0.524257	-0.350778	0.524257
EMG1	-0.044488	0.886587	0.721633	0.0812563	0.721633	0.0812563	-0.250387	0.240107	-0.199256	0.620273	-0.199256	0.620273	0.238075	0.972727	-0.447214	0.391318	-0.447214	0.391318
EMP2	0.239126	0.350463	0.0872107	0.818913	0.0872107	0.818913	-0.510641	0.0510914	0.9202	0.169654	0.9202	0.169654	0.187162	0.972727	0.444401	0.359441	0.444401	0.359441
ENSA	-0.473663	0.135262	-0.48323	0.217148	-0.48323	0.217148	0.136063	0.406414	0.434835	0.253214	0.434835	0.253214	0.233163	0.972727	0.404524	0.424699	0.404524	0.424699
ENTPD6	0.345329	0.193235	1.49534	0.00468319	1.49534	0.00468319	0.228962	0.242419	1.17844	0.0608392	1.17844	0.0608392	0.126607	0.974689	-0.441968	0.413082	-0.441968	0.413082
EPHB2	-1.14485	0.00589503	-1.19955	0.00836046	-1.19955	0.00836046	0.194239	0.358185	0.361788	0.552615	0.361788	0.552615	0.00985263	0.997152	-0.0756238	0.876046	-0.0756238	0.876046
ERAL1	-0.259655	0.291151	0.321928	0.422168	0.321928	0.422168	0.0187952	0.934139	0.576435	0.267832	0.576435	0.267832	0.11776	0.975097	-0.401752	0.44035	-0.401752	0.44035
ERCC1	-0.226933	0.379106	0.427825	0.290427	0.427825	0.290427	-0.200126	0.378839	0.686358	0.112324	0.686358	0.112324	0.172611	0.972727	-0.503755	0.355615	-0.503755	0.355615
ESRRA	-0.258804	0.345489	0.638639	0.13863	0.638639	0.13863	0.00828193	0.979078	1.16511	0.16494	1.16511	0.16494	0.32936	0.972727	-0.0847967	0.877527	-0.0847967	0.877527
ETHE1	0.22728	0.360466	1.04747	0.0242706	1.04747	0.0242706	0.114719	0.584651	1.00276	0.0252609	1.00276	0.0252609	0.303294	0.972727	-0.665621	0.265493	-0.665621	0.265493
ETV5	1.04988	0.00436981	0.733632	0.0700569	0.733632	0.0700569	-0.0955332	0.595469	-0.0817812	0.821521	-0.0817812	0.821521	-0.193681	0.972727	0.31514	0.520464	0.31514	0.520464
EXOSC1	-0.0736276	0.777038	0.306001	0.415993	0.306001	0.415993	0.0991263	0.535716	0.412989	0.420769	0.412989	0.420769	-0.0204414	0.994957	-0.42438	0.392147	-0.42438	0.392147
EXOSC3	-0.132453	0.637964	-0.777413	0.0554035	-0.777413	0.0554035	-0.027884	0.888883	-0.154363	0.66123	-0.154363	0.66123	0.0949643	0.990269	0.204884	0.673106	0.204884	0.673106
EXOSC4	-0.285755	0.410706	0.450907	0.255218	0.450907	0.255218	-0.110685	0.691518	0.638113	0.101299	0.638113	0.101299	0.146154	0.982799	-0.670151	0.250312	-0.670151	0.250312
EXOSC5	-0.750389	0.0289082	-0.0918599	0.839243	-0.0918599	0.839243	-0.222877	0.509554	1.20119	0.0170356	1.20119	0.0170356	0.543004	0.972727	-0.45014	0.419426	-0.45014	0.419426
EXOSC7	-0.079241	0.747019	0.390588	0.311179	0.390588	0.311179	-0.0957287	0.623032	0.424016	0.290872	0.424016	0.290872	-0.0641262	0.992554	-0.692211	0.233057	-0.692211	0.233057
FADS2	0.722678	0.0221932	1.59042	0.00217999	1.59042	0.00217999	-0.0998583	0.8393	-0.0189907	0.973514	-0.0189907	0.973514	0.0965546	0.984251	-0.688939	0.230057	-0.688939	0.230057
FAH	0.472268	0.071616	1.35241	0.00493521	1.35241	0.00493521	-0.489574	0.134175	0.145868	0.73788	0.145868	0.73788	0.106074	0.979877	-0.808793	0.198359	-0.808793	0.198359
FAHD2A	-0.123728	0.619096	0.683323	0.0803637	0.683323	0.0803637	-0.0491128	0.821476	1.07157	0.0280731	1.07157	0.0280731	0.037169	0.992557	-0.983653	0.163944	-0.983653	0.163944
FAM32A	-0.532779	0.0738191	-0.942066	0.0354389	-0.942066	0.0354389	-0.0461916	0.872823	0.242673	0.528327	0.242673	0.528327	0.20929	0.972727	0.546794	0.328962	0.546794	0.328962
FAM46B	2.72962	0.000270193	3.44616	1.22853e-05	3.44616	1.22853e-05	NA	NA	NA	NA	NA	NA	0.259011	0.972727	-0.451205	0.365605	-0.451205	0.365605
FAM49A	-0.424318	0.200919	-1.86657	0.00415112	-1.86657	0.00415112	0.187373	0.414737	0.00703196	0.985773	0.00703196	0.985773	-0.189115	0.972727	0.445383	0.491061	0.445383	0.491061
FAM50A	0.494259	0.0758638	1.04533	0.0159025	1.04533	0.0159025	0.151865	0.497316	0.593687	0.11562	0.593687	0.11562	-0.0438626	0.992557	-0.814233	0.193647	-0.814233	0.193647
FAM60A	-0.432233	0.248915	-1.22121	0.0154021	-1.22121	0.0154021	NA	NA	NA	NA	NA	NA	0.0773186	0.992554	0.534621	0.357798	0.534621	0.357798
FAM89B	-0.843287	0.033159	0.258398	0.555674	0.258398	0.555674	-0.0230876	0.910199	0.969435	0.032144	0.969435	0.032144	0.417754	0.972727	-0.324096	0.558187	-0.324096	0.558187
FAM96B	0.360029	0.252279	1.086	0.026494	1.086	0.026494	-0.00453506	0.984288	0.769295	0.096068	0.769295	0.096068	0.17838	0.972727	-0.0445389	0.937907	-0.0445389	0.937907
FASTK	-0.339524	0.250819	0.403602	0.33375	0.403602	0.33375	-0.203207	0.213538	1.0389	0.0468021	1.0389	0.0468021	0.29567	0.972727	-0.114191	0.832056	-0.114191	0.832056
FBL	-0.798842	0.0275526	0.0245173	0.950865	0.0245173	0.950865	0.167385	0.569032	0.0788259	0.832998	0.0788259	0.832998	0.246468	0.972727	-0.670566	0.231873	-0.670566	0.231873
FBLIM1	0.636731	0.0449592	1.27521	0.0113905	1.27521	0.0113905	-0.403108	0.281236	0.360802	0.568807	0.360802	0.568807	-0.411834	0.972727	-1.02708	0.174599	-1.02708	0.174599
FBXL16	1.26376	0.00297565	1.39014	0.00402722	1.39014	0.00402722	-0.453978	0.0842612	0.68447	0.183802	0.68447	0.183802	0.0672479	0.992554	-0.0717132	0.882217	-0.0717132	0.882217
FBXO2	1.5832	0.00123034	2.14995	0.000759393	2.14995	0.000759393	-0.107181	0.785964	1.08047	0.0598465	1.08047	0.0598465	-0.316485	0.972727	-1.00809	0.18085	-1.00809	0.18085
FBXO22	0.700333	0.0261567	0.33145	0.393219	0.33145	0.393219	-0.0578378	0.749906	-0.116568	0.75097	-0.116568	0.75097	-0.205724	0.972727	-0.152914	0.761885	-0.152914	0.761885
FBXO25	0.0346665	0.90514	-0.43036	0.282739	-0.43036	0.282739	0.230376	0.26253	-0.371917	0.294323	-0.371917	0.294323	0.299864	0.972727	1.04315	0.165787	1.04315	0.165787
FBXO42	0.0530975	0.821773	-0.192964	0.608416	-0.192964	0.608416	0.138151	0.405697	-0.288997	0.407507	-0.288997	0.407507	-0.233309	0.972727	-0.23348	0.62063	-0.23348	0.62063
FBXW2	0.0705875	0.798042	-0.271197	0.48184	-0.271197	0.48184	0.190807	0.268948	-0.60619	0.0945742	-0.60619	0.0945742	-0.00132085	0.999144	0.569136	0.292171	0.569136	0.292171
FBXW5	-0.322151	0.279886	0.739699	0.091681	0.739699	0.091681	-0.139428	0.55943	0.96409	0.0630548	0.96409	0.0630548	0.284115	0.972727	-0.195956	0.71797	-0.195956	0.71797
FDFT1	0.223558	0.354449	0.690295	0.0757805	0.690295	0.0757805	0.0690987	0.728225	0.0442364	0.919518	0.0442364	0.919518	-0.230718	0.972727	-0.68717	0.225709	-0.68717	0.225709
FDPS	0.268503	0.24703	0.928731	0.0234651	0.928731	0.0234651	0.225966	0.329118	0.571279	0.293921	0.571279	0.293921	-0.0766826	0.991525	-0.911941	0.170981	-0.911941	0.170981
FEZ1	-0.313524	0.219428	-0.0320395	0.938804	-0.0320395	0.938804	0.169328	0.371576	0.226592	0.539887	0.226592	0.539887	-0.0387691	0.992557	-0.225393	0.6461	-0.225393	0.6461
FGD1	-0.382171	0.170335	0.022168	0.961057	0.022168	0.961057	-0.202629	0.35353	-0.0448221	0.9036	-0.0448221	0.9036	-0.0723437	0.992554	-0.511539	0.372043	-0.511539	0.372043
FGFR2	-1.05698	0.00392964	-2.06808	0.000570395	-2.06808	0.000570395	-0.0538638	0.873485	-0.167137	0.699999	-0.167137	0.699999	0.00783161	0.997312	0.867004	0.192799	0.867004	0.192799
FHL1	0.371167	0.114516	-0.658137	0.121695	-0.658137	0.121695	0.0184893	0.922775	-0.13286	0.716805	-0.13286	0.716805	0.0472042	0.992554	0.64898	0.273629	0.64898	0.273629
FHL3	0.816145	0.0128373	1.74597	0.00170106	1.74597	0.00170106	-0.127089	0.694819	0.335116	0.540073	0.335116	0.540073	0.259612	0.972727	-0.575864	0.301088	-0.575864	0.301088
FIBP	-0.451079	0.14361	0.316155	0.460882	0.316155	0.460882	0.182446	0.398651	0.91361	0.0654958	0.91361	0.0654958	0.292269	0.972727	-0.0814701	0.883282	-0.0814701	0.883282
FIS1	-0.0186249	0.957364	1.01432	0.0361658	1.01432	0.0361658	-0.0164804	0.908819	0.837244	0.0723026	0.837244	0.0723026	0.285276	0.972727	-0.217722	0.700874	-0.217722	0.700874
FKBP11	0.22932	0.409142	-0.0908184	0.831702	-0.0908184	0.831702	0.323855	0.160233	0.565525	0.103259	0.565525	0.103259	-0.2456	0.972727	0.575276	0.306884	0.575276	0.306884
FKBP1A	-0.129193	0.632096	0.0894533	0.824932	0.0894533	0.824932	-0.178668	0.236533	0.612626	0.27881	0.612626	0.27881	0.0984159	0.987552	0.20144	0.680842	0.20144	0.680842
FKBP1B	-0.749175	0.0360842	0.430548	0.281462	0.430548	0.281462	0.666485	0.132646	1.46595	0.0159196	1.46595	0.0159196	0.096761	0.992554	-0.50162	0.351861	-0.50162	0.351861
FKBP7	-0.0850623	0.843827	-0.908085	0.0755892	-0.908085	0.0755892	-1.24674	0.00241496	-0.600548	0.440305	-0.600548	0.440305	-0.333724	0.972727	0.619959	0.34702	0.619959	0.34702
FKBP8	-0.0837382	0.764662	0.685854	0.124104	0.685854	0.124104	0.173982	0.719494	0.825366	0.202976	0.825366	0.202976	0.18617	0.972727	-0.467612	0.410855	-0.467612	0.410855
FKBPL	-0.410459	0.224242	0.283627	0.471234	0.283627	0.471234	NA	NA	NA	NA	NA	NA	-0.135384	0.984012	-0.80917	0.205446	-0.80917	0.205446
FLAD1	-0.411535	0.139937	0.396922	0.316851	0.396922	0.316851	0.0544608	0.822371	0.48122	0.223495	0.48122	0.223495	0.103241	0.985621	-0.495106	0.354865	-0.495106	0.354865
FLII	0.207502	0.41264	0.86027	0.0360956	0.86027	0.0360956	-0.310278	0.18045	0.300474	0.406035	0.300474	0.406035	0.0489683	0.992557	-0.53797	0.30315	-0.53797	0.30315
FLRT3	-0.0720124	0.886572	-1.0456	0.0239319	-1.0456	0.0239319	0.607552	0.053549	-0.10546	0.787504	-0.10546	0.787504	0.362374	0.972727	0.923741	0.18815	0.923741	0.18815
FLYWCH1	0.563105	0.0697418	1.35558	0.00505533	1.35558	0.00505533	0.101764	0.697964	0.99005	0.0450944	0.99005	0.0450944	-0.155225	0.972727	-0.781706	0.20585	-0.781706	0.20585
FNDC4	0.284798	0.297541	1.34326	0.00718165	1.34326	0.00718165	0.324616	0.483755	0.877514	0.124565	0.877514	0.124565	-0.0698294	0.992554	-0.785749	0.214079	-0.785749	0.214079
FOSL1	1.454	0.00146267	1.76377	0.0019573	1.76377	0.0019573	NA	NA	NA	NA	NA	NA	-0.178946	0.972727	-0.687037	0.255277	-0.687037	0.255277
FOXRED1	-0.28018	0.263141	0.545623	0.142396	0.545623	0.142396	0.1439	0.611746	0.79683	0.104556	0.79683	0.104556	0.0945412	0.987552	-0.677107	0.225574	-0.677107	0.225574
FRAT2	-1.7344	0.00459771	-1.29194	0.0133108	-1.29194	0.0133108	0.0983162	0.81114	1.65779	0.0177613	1.65779	0.0177613	0.306389	0.972727	-0.320612	0.569341	-0.320612	0.569341
FTSJ1	-0.0865534	0.735676	0.240309	0.521906	0.240309	0.521906	-0.121381	0.553153	0.509883	0.333061	0.509883	0.333061	0.0437193	0.992557	-0.316647	0.505901	-0.316647	0.505901
FUNDC1	0.534625	0.113809	-0.740937	0.0757985	-0.740937	0.0757985	-0.137982	0.522074	0.263127	0.520178	0.263127	0.520178	-0.218889	0.972727	0.771543	0.214898	0.771543	0.214898
FUNDC2	-0.903129	0.0222106	-0.387206	0.325291	-0.387206	0.325291	0.00676093	0.964756	0.146399	0.753962	0.146399	0.753962	0.124492	0.984012	-0.115041	0.820506	-0.115041	0.820506
GABARAP	-0.124353	0.674563	0.752809	0.0989414	0.752809	0.0989414	0.0370906	0.810799	0.579291	0.218045	0.579291	0.218045	0.191723	0.972727	-0.462781	0.419817	-0.462781	0.419817
GABPB2	0.374802	0.166991	-0.649629	0.105285	-0.649629	0.105285	-0.37779	0.212703	-1.68653	0.011511	-1.68653	0.011511	-0.541361	0.972727	0.249683	0.613036	0.249683	0.613036
GADD45GIP1	-0.250369	0.446321	0.607546	0.155083	0.607546	0.155083	0.237094	0.65526	0.786767	0.223076	0.786767	0.223076	0.304802	0.972727	-0.625482	0.291137	-0.625482	0.291137
GAL	0.867002	0.0368309	0.672049	0.319814	0.672049	0.319814	NA	NA	NA	NA	NA	NA	-0.720967	0.972727	-0.470951	0.584667	-0.470951	0.584667
GALE	0.274138	0.332182	1.06684	0.0139553	1.06684	0.0139553	0.14984	0.535771	0.356732	0.520633	0.356732	0.520633	0.00836145	0.997312	-0.873164	0.180481	-0.873164	0.180481
GALT	0.101924	0.654873	0.976611	0.0200785	0.976611	0.0200785	-0.191057	0.420639	1.01718	0.0597307	1.01718	0.0597307	0.1042	0.976717	-0.535641	0.297948	-0.535641	0.297948
GAMT	-0.00884468	0.977355	0.756672	0.0836416	0.756672	0.0836416	0.18532	0.349029	1.08805	0.0306632	1.08805	0.0306632	0.221077	0.972727	-0.404574	0.455176	-0.404574	0.455176
GBA2	0.439022	0.104653	1.03164	0.021979	1.03164	0.021979	0.138462	0.465224	0.52101	0.327286	0.52101	0.327286	0.0303996	0.992557	-0.0897009	0.861015	-0.0897009	0.861015
GCAT	-0.738938	0.025298	0.114382	0.780848	0.114382	0.780848	-0.0508808	0.843173	0.799107	0.0676915	0.799107	0.0676915	0.192147	0.972727	-0.704076	0.231406	-0.704076	0.231406
GCDH	-0.562191	0.0580026	0.33278	0.358599	0.33278	0.358599	0.171195	0.513435	0.534507	0.283176	0.534507	0.283176	0.203426	0.972727	-0.611526	0.252345	-0.611526	0.252345
GDF15	2.34158	0.000368508	3.20317	2.57107e-05	3.20317	2.57107e-05	NA	NA	NA	NA	NA	NA	-0.385275	0.972727	-1.26395	0.134655	-1.26395	0.134655
GDI1	0.197218	0.392392	0.76129	0.0531809	0.76129	0.0531809	0.317498	0.251638	0.276035	0.592588	0.276035	0.592588	0.0270897	0.992767	-0.610353	0.255725	-0.610353	0.255725
GDPD5	0.633873	0.0596544	1.50115	0.00410721	1.50115	0.00410721	0.340381	0.283654	1.29311	0.0166695	1.29311	0.0166695	0.174617	0.972727	-0.580051	0.30358	-0.580051	0.30358
GEMIN7	-0.0780444	0.784974	0.580937	0.198334	0.580937	0.198334	0.17626	0.412471	0.873737	0.0924007	0.873737	0.0924007	0.119828	0.980068	-0.16783	0.77301	-0.16783	0.77301
GFER	-0.86312	0.0321146	0.0615875	0.896352	0.0615875	0.896352	0.247257	0.498297	1.52008	0.0316431	1.52008	0.0316431	0.420671	0.972727	-0.0105506	0.987372	-0.0105506	0.987372
GIPC1	0.403785	0.142819	1.20391	0.0113112	1.20391	0.0113112	-0.0625432	0.863951	0.944642	0.0710075	0.944642	0.0710075	0.112649	0.980998	-0.673147	0.250312	-0.673147	0.250312
GIT1	-0.510259	0.101796	0.115226	0.785936	0.115226	0.785936	-0.178763	0.506709	0.345147	0.480858	0.345147	0.480858	0.139101	0.974689	-0.45539	0.389857	-0.45539	0.389857
GLIPR1	1.97289	0.000921597	1.5457	0.00225747	1.5457	0.00225747	0.0134693	0.959912	-0.829878	0.108692	-0.829878	0.108692	0.21259	0.972727	0.468682	0.349891	0.468682	0.349891
GLO1	0.187017	0.536555	-0.970818	0.0858777	-0.970818	0.0858777	-0.0378599	0.845411	-0.228932	0.563102	-0.228932	0.563102	-0.175174	0.972727	0.649254	0.369419	0.649254	0.369419
GMDS	-0.139773	0.594506	0.12203	0.74763	0.12203	0.74763	0.220862	0.572339	0.346365	0.524209	0.346365	0.524209	-0.15518	0.972727	-0.424256	0.377566	-0.424256	0.377566
GMPPA	0.135051	0.634347	0.951228	0.0247789	0.951228	0.0247789	0.171979	0.471021	1.10199	0.0397351	1.10199	0.0397351	0.0777187	0.992554	-0.627647	0.255172	-0.627647	0.255172
GMPPB	0.289026	0.276676	1.27865	0.00754688	1.27865	0.00754688	0.231033	0.596649	0.754429	0.279016	0.754429	0.279016	0.00954708	0.997152	-0.835447	0.197613	-0.835447	0.197613
GNA11	-0.365285	0.194039	-0.110825	0.800036	-0.110825	0.800036	-0.00180001	0.99284	0.147249	0.685871	0.147249	0.685871	0.214395	0.972727	-0.206904	0.697687	-0.206904	0.697687
GNAI2	-0.0664487	0.804784	-0.0313503	0.941936	-0.0313503	0.941936	-0.102945	0.692056	0.119418	0.74308	0.119418	0.74308	-0.0745534	0.992554	-0.248413	0.626878	-0.248413	0.626878
GNAL	-0.50432	0.103432	-1.73927	0.00119291	-1.73927	0.00119291	-0.187087	0.344123	-0.0824863	0.823049	-0.0824863	0.823049	0.0702759	0.992554	0.818448	0.193464	0.818448	0.193464
GNB1	0.107428	0.651048	-0.368344	0.358324	-0.368344	0.358324	0.187008	0.257847	-0.219704	0.537953	-0.219704	0.537953	-0.173077	0.972727	0.282987	0.580424	0.282987	0.580424
GNB1L	0.145191	0.603168	0.983097	0.0197554	0.983097	0.0197554	0.0716513	0.783223	1.14803	0.0296981	1.14803	0.0296981	-0.0610126	0.992554	-0.956102	0.167042	-0.956102	0.167042
GNB2	0.192882	0.464107	0.993239	0.0238123	0.993239	0.0238123	0.0676645	0.846443	0.33707	0.501717	0.33707	0.501717	0.183966	0.972727	-0.683198	0.240495	-0.683198	0.240495
GNPNAT1	-0.308979	0.188636	-1.0406	0.0161893	-1.0406	0.0161893	-0.0622557	0.729143	0.00769731	0.981265	0.00769731	0.981265	0.196853	0.972727	0.783965	0.200645	0.783965	0.200645
GOLPH3	0.210418	0.359096	-1.08479	0.0165029	-1.08479	0.0165029	0.101856	0.824204	-0.354371	0.306884	-0.354371	0.306884	-0.167555	0.972727	0.930109	0.17883	0.930109	0.17883
GORASP1	0.0148142	0.954327	0.178935	0.64261	0.178935	0.64261	-0.242852	0.208343	0.016327	0.972546	0.016327	0.972546	0.051906	0.992554	-0.337451	0.487327	-0.337451	0.487327
GOSR2	-0.132502	0.651326	0.127659	0.741811	0.127659	0.741811	-0.0847265	0.669479	0.378647	0.364603	0.378647	0.364603	0.184179	0.972727	0.0921763	0.84705	0.0921763	0.84705
GOT1	0.978586	0.00647358	1.18992	0.00820297	1.18992	0.00820297	0.378084	0.126141	0.437058	0.351308	0.437058	0.351308	-0.337373	0.972727	-0.570168	0.277186	-0.570168	0.277186
GOT2	-0.150193	0.514872	-0.100624	0.793333	-0.100624	0.793333	0.214851	0.279485	-0.356291	0.417643	-0.356291	0.417643	-0.0219363	0.994683	-0.236226	0.610076	-0.236226	0.610076
GPI	-0.0420322	0.890673	0.717751	0.0664485	0.717751	0.0664485	0.271637	0.160624	0.369207	0.413248	0.369207	0.413248	0.146487	0.972727	-0.580216	0.27315	-0.580216	0.27315
GPS1	-0.379546	0.190628	0.525224	0.163995	0.525224	0.163995	0.110032	0.58094	0.581509	0.224415	0.581509	0.224415	0.290144	0.972727	-0.544248	0.29642	-0.544248	0.29642
GPS2	-0.388933	0.218576	0.0577022	0.897388	0.0577022	0.897388	-0.0509602	0.836606	0.0145172	0.969901	0.0145172	0.969901	0.359925	0.972727	-0.127479	0.811832	-0.127479	0.811832
GPT2	-0.231869	0.36327	0.192166	0.616358	0.192166	0.616358	-0.237005	0.374071	0.0966297	0.85057	0.0966297	0.85057	0.0236627	0.994683	-0.534866	0.307925	-0.534866	0.307925
GPX3	1.29759	0.00229496	2.3369	0.000432025	2.3369	0.000432025	-0.320937	0.284979	0.965822	0.134432	0.965822	0.134432	0.127299	0.972727	-0.107156	0.844837	-0.107156	0.844837
GRB2	0.20695	0.374629	-0.0635838	0.867515	-0.0635838	0.867515	0.195065	0.408575	0.281921	0.412431	0.281921	0.412431	-0.0564507	0.992554	-0.0881334	0.848392	-0.0881334	0.848392
GRPEL1	0.266663	0.320167	0.125212	0.756238	0.125212	0.756238	-0.0647524	0.739378	0.0968602	0.779858	0.0968602	0.779858	-0.0778283	0.992554	-0.307023	0.530586	-0.307023	0.530586
GRWD1	-0.421669	0.16898	0.434608	0.238389	0.434608	0.238389	0.0429787	0.877731	0.662684	0.139977	0.662684	0.139977	0.269658	0.972727	-0.556448	0.284299	-0.556448	0.284299
GSTM3	-0.70825	0.0195891	0.0705272	0.865727	0.0705272	0.865727	-0.560311	0.0923598	-0.0498625	0.904845	-0.0498625	0.904845	-0.00592344	0.997312	-0.728581	0.225709	-0.728581	0.225709
GSTZ1	-0.142323	0.571356	0.818559	0.0729134	0.818559	0.0729134	0.0848443	0.692642	1.24945	0.0293808	1.24945	0.0293808	0.182105	0.972727	-0.761411	0.240495	-0.761411	0.240495
GTF2H4	-0.38707	0.162173	0.717392	0.0718904	0.717392	0.0718904	NA	NA	NA	NA	NA	NA	0.132582	0.973953	-1.08523	0.158014	-1.08523	0.158014
GTF2H5	-0.119883	0.659068	-0.661251	0.105562	-0.661251	0.105562	-0.00892887	0.960106	0.0562772	0.882948	0.0562772	0.882948	0.017172	0.99545	0.755257	0.217868	0.755257	0.217868
GTF3C5	-0.54758	0.072067	0.227851	0.55508	0.227851	0.55508	-0.154694	0.476398	0.170359	0.678874	0.170359	0.678874	0.161689	0.972727	-0.5157	0.326796	-0.5157	0.326796
GTPBP6	-0.355529	0.252009	0.432526	0.276361	0.432526	0.276361	NA	NA	NA	NA	NA	NA	0.311127	0.972727	-0.416661	0.421369	-0.416661	0.421369
GUK1	-0.13036	0.662836	1.04483	0.0294819	1.04483	0.0294819	0.0772585	0.692858	0.893124	0.100369	0.893124	0.100369	0.32489	0.972727	-0.324598	0.555346	-0.324598	0.555346
H2AFY	-0.601433	0.0376026	-0.452839	0.223282	-0.452839	0.223282	-0.0271049	0.860628	-0.0361059	0.916771	-0.0361059	0.916771	0.061408	0.992554	-0.135335	0.777472	-0.135335	0.777472
H2AFY2	-1.12608	0.00520286	-1.08142	0.0119926	-1.08142	0.0119926	0.219904	0.265245	0.0200136	0.959721	0.0200136	0.959721	0.148141	0.972727	-0.143487	0.760671	-0.143487	0.760671
HARS	0.00516874	0.985896	0.316026	0.382466	0.316026	0.382466	0.13652	0.540931	0.0777805	0.854874	0.0777805	0.854874	-0.0277188	0.994038	-0.318119	0.492983	-0.318119	0.492983
HARS2	0.19674	0.469374	-0.45106	0.310595	-0.45106	0.310595	0.00734581	0.979032	-0.305423	0.410873	-0.305423	0.410873	-0.419501	0.972727	-0.0615	0.914781	-0.0615	0.914781
HAX1	0.577616	0.0561476	1.34314	0.00847051	1.34314	0.00847051	-0.19076	0.404256	0.50827	0.25026	0.50827	0.25026	0.0772309	0.992554	-0.385597	0.473043	-0.385597	0.473043
HCCS	0.396708	0.112648	0.204803	0.581308	0.204803	0.581308	-0.0138851	0.948331	0.0841355	0.828423	0.0841355	0.828423	0.0776705	0.991525	-0.190411	0.684693	-0.190411	0.684693
HDGF	-0.737564	0.0212526	-0.405291	0.361572	-0.405291	0.361572	0.111663	0.539367	0.326607	0.354673	0.326607	0.354673	0.146458	0.972727	-0.285142	0.614702	-0.285142	0.614702
HDGFRP3	-0.265149	0.491518	-1.58825	0.00247419	-1.58825	0.00247419	0.394934	0.0747267	0.0660713	0.876904	0.0660713	0.876904	0.0859489	0.992554	1.088	0.158354	1.088	0.158354
HDHD3	0.422259	0.089444	0.996233	0.0231367	0.996233	0.0231367	0.0346698	0.863093	0.818356	0.136694	0.818356	0.136694	-0.154121	0.972727	-0.754609	0.213991	-0.754609	0.213991
HEBP1	-0.24844	0.300219	0.0959061	0.801914	0.0959061	0.801914	-0.0755025	0.717824	0.0985601	0.826924	0.0985601	0.826924	-0.152655	0.972727	-0.582842	0.266488	-0.582842	0.266488
HHLA3	-0.0166493	0.946647	0.365397	0.372074	0.365397	0.372074	-0.091869	0.558748	-0.076544	0.886916	-0.076544	0.886916	-0.0594881	0.992554	-0.482078	0.375923	-0.482078	0.375923
HIF1AN	-0.181392	0.449823	-0.000161306	0.999649	-0.000161306	0.999649	0.0971351	0.575687	-0.131981	0.695691	-0.131981	0.695691	-0.0435387	0.992557	-0.238294	0.622599	-0.238294	0.622599
HIGD2A	-0.145056	0.626738	0.627344	0.137072	0.627344	0.137072	0.0719127	0.685526	0.678099	0.227206	0.678099	0.227206	0.26888	0.972727	-0.114714	0.829014	-0.114714	0.829014
HINT1	-0.352843	0.260052	0.660268	0.109036	0.660268	0.109036	0.255982	0.333232	0.970273	0.0714804	0.970273	0.0714804	0.172875	0.972727	-0.290548	0.567245	-0.290548	0.567245
HIST1H1C	-0.195134	0.554039	0.297603	0.440402	0.297603	0.440402	-0.267168	0.382218	-0.241468	0.589488	-0.241468	0.589488	0.279151	0.972727	-0.528663	0.320586	-0.528663	0.320586
HIST1H2BD	0.118209	0.762288	-0.650831	0.118133	-0.650831	0.118133	-0.0406716	0.891419	-0.073213	0.883645	-0.073213	0.883645	0.588599	0.972727	0.681116	0.252345	0.681116	0.252345
HIST1H2BK	-0.293461	0.434973	-0.15436	0.702737	-0.15436	0.702737	0.031231	0.903606	0.928876	0.108738	0.928876	0.108738	0.487837	0.972727	0.106554	0.832229	0.106554	0.832229
HIST2H2BE	-0.565208	0.0662346	-0.853472	0.0316645	-0.853472	0.0316645	-0.142127	0.592486	0.259077	0.595698	0.259077	0.595698	0.527772	0.972727	0.722367	0.209078	0.722367	0.209078
HMOX1	2.34477	0.000590216	3.23332	2.89293e-05	3.23332	2.89293e-05	-0.936064	0.0571494	0.40815	0.357104	0.40815	0.357104	0.0460929	0.992557	-0.882151	0.191199	-0.882151	0.191199
HMOX2	0.539042	0.0714966	0.967702	0.0268106	0.967702	0.0268106	NA	NA	NA	NA	NA	NA	-0.0677374	0.992554	-0.756946	0.215203	-0.756946	0.215203
HN1	0.00194149	0.994951	0.505599	0.20578	0.505599	0.20578	0.148496	0.372147	0.865455	0.100161	0.865455	0.100161	0.138747	0.974689	-0.403826	0.433357	-0.403826	0.433357
HOMER3	-0.705479	0.0477018	0.208208	0.628356	0.208208	0.628356	-0.0793187	0.878492	0.482239	0.542818	0.482239	0.542818	0.252341	0.972727	-0.347907	0.518974	-0.347907	0.518974
HPCAL1	-1.34888	0.00340427	-0.617338	0.167077	-0.617338	0.167077	-0.710319	0.103426	0.614086	0.275338	0.614086	0.275338	0.224225	0.972727	-0.259804	0.643841	-0.259804	0.643841
HPS1	0.320278	0.21902	1.1821	0.0141901	1.1821	0.0141901	0.203823	0.289262	0.497169	0.34898	0.497169	0.34898	0.226645	0.972727	-0.460035	0.395409	-0.460035	0.395409
HRAS	-0.446647	0.174967	0.766137	0.077541	0.766137	0.077541	NA	NA	NA	NA	NA	NA	0.572085	0.972727	-0.272107	0.605321	-0.272107	0.605321
HS1BP3	-0.140172	0.557988	0.653019	0.0956056	0.653019	0.0956056	0.161869	0.355224	0.5346	0.265635	0.5346	0.265635	0.0602319	0.992554	-0.656472	0.24281	-0.656472	0.24281
HSD17B1	0.148674	0.557913	1.2137	0.021869	1.2137	0.021869	0.0361834	0.899281	0.63839	0.195899	0.63839	0.195899	0.0674979	0.992554	-0.562044	0.366534	-0.562044	0.366534
HSD17B8	0.207594	0.575686	1.08259	0.013121	1.08259	0.013121	NA	NA	NA	NA	NA	NA	0.256921	0.972727	-0.632908	0.24709	-0.632908	0.24709
HSF2BP	-0.095452	0.899353	-0.030738	0.937392	-0.030738	0.937392	NA	NA	NA	NA	NA	NA	0.245723	0.990269	-0.259666	0.570251	-0.259666	0.570251
HSPB8	2.67556	0.000289602	2.96527	3.02884e-05	2.96527	3.02884e-05	-0.518555	0.0529237	-0.184688	0.70386	-0.184688	0.70386	-0.0207885	0.995244	-0.548649	0.288582	-0.548649	0.288582
HTRA2	0.202222	0.408024	0.993835	0.0229714	0.993835	0.0229714	0.145917	0.401036	1.01594	0.128189	1.01594	0.128189	-0.00232703	0.999144	-0.844422	0.193629	-0.844422	0.193629
HYI	2.8752	0.00157096	4.38235	5.63024e-06	4.38235	5.63024e-06	NA	NA	NA	NA	NA	NA	0.167013	0.990269	-0.711087	0.248407	-0.711087	0.248407
ICAM3	0.28414	0.465149	1.02669	0.0452461	1.02669	0.0452461	-0.491074	0.174921	-0.216334	0.715808	-0.216334	0.715808	0.209171	0.972727	-0.0167079	0.980649	-0.0167079	0.980649
ID1	0.0111206	0.977399	0.703895	0.0805836	0.703895	0.0805836	-0.818282	0.0599921	0.118741	0.839289	0.118741	0.839289	0.579619	0.972727	-0.471012	0.361349	-0.471012	0.361349
ID3	1.32287	0.00711611	1.88647	0.00143198	1.88647	0.00143198	-1.32166	0.00728964	0.446459	0.432083	0.446459	0.432083	0.408056	0.972727	-0.162071	0.765895	-0.162071	0.765895
IDH2	-0.518692	0.07051	0.359519	0.345534	0.359519	0.345534	-0.224746	0.284158	0.400297	0.369848	0.400297	0.369848	0.17279	0.972727	-0.595647	0.275779	-0.595647	0.275779
IDH3B	-0.146633	0.600285	0.451732	0.220122	0.451732	0.220122	0.181143	0.302428	0.82248	0.155152	0.82248	0.155152	0.13785	0.973712	-0.484207	0.333284	-0.484207	0.333284
IDH3G	-0.218015	0.420261	0.637141	0.0910867	0.637141	0.0910867	-0.110531	0.605768	0.862094	0.164419	0.862094	0.164419	0.192949	0.972727	-0.753743	0.202548	-0.753743	0.202548
IDS	1.25449	0.00228166	1.10605	0.011412	1.10605	0.011412	-0.0519638	0.787813	-0.438489	0.18402	-0.438489	0.18402	-0.00828664	0.997152	0.623038	0.248876	0.623038	0.248876
IFRD2	-0.0374035	0.906417	0.858749	0.0605369	0.858749	0.0605369	0.115076	0.738771	0.0047271	0.994871	0.0047271	0.994871	0.292335	0.972727	-0.118517	0.830497	-0.118517	0.830497
IFT20	0.182561	0.507814	0.221095	0.544466	0.221095	0.544466	0.0373304	0.856904	-0.660601	0.178773	-0.660601	0.178773	0.0250643	0.994813	0.62365	0.245003	0.62365	0.245003
IGFBP4	-0.382647	0.160132	0.523349	0.255364	0.523349	0.255364	-0.676375	0.0282233	0.278254	0.519327	0.278254	0.519327	-0.0206046	0.995244	-0.606578	0.33353	-0.606578	0.33353
IL13RA1	0.697192	0.0213463	-0.651173	0.179953	-0.651173	0.179953	0.0118355	0.961409	0.335371	0.576414	0.335371	0.576414	-0.0812447	0.990269	0.822288	0.24709	0.822288	0.24709
ILF2	-0.511659	0.054217	-0.399039	0.318818	-0.399039	0.318818	0.0914417	0.666492	0.144589	0.676167	0.144589	0.676167	-0.0413049	0.992557	-0.197255	0.701101	-0.197255	0.701101
IMMP2L	0.151247	0.758101	-0.923977	0.0238123	-0.923977	0.0238123	-0.0218317	0.931481	0.628259	0.135528	0.628259	0.135528	-0.477568	0.972727	0.123723	0.792381	0.123723	0.792381
IMP4	-0.30564	0.285567	0.593091	0.129846	0.593091	0.129846	-0.0496696	0.847296	0.637396	0.100771	0.637396	0.100771	0.18601	0.972727	-0.568772	0.291385	-0.568772	0.291385
IMPACT	0.139453	0.793505	-1.35761	0.00448775	-1.35761	0.00448775	0.00247637	0.993077	-0.359142	0.356989	-0.359142	0.356989	0.212192	0.982318	1.00871	0.160823	1.00871	0.160823
ING4	-0.450099	0.0807657	0.0677306	0.86526	0.0677306	0.86526	0.087805	0.64812	0.507966	0.187594	0.507966	0.187594	0.0210928	0.99482	-0.717698	0.217911	-0.717698	0.217911
INPP1	3.76403	0.00322859	3.97797	7.65142e-06	3.97797	7.65142e-06	0.189108	0.395259	0.332026	0.366409	0.332026	0.366409	-0.48849	0.972727	-0.469194	0.375403	-0.469194	0.375403
INPPL1	-0.366649	0.169283	0.405397	0.314758	0.405397	0.314758	-0.279124	0.15846	0.0382734	0.914808	0.0382734	0.914808	0.13759	0.972727	-0.391263	0.453869	-0.391263	0.453869
INSIG1	1.55909	0.000956301	1.34343	0.00415784	1.34343	0.00415784	0.248166	0.337237	0.199283	0.589902	0.199283	0.589902	-0.156886	0.972727	-0.0228899	0.962576	-0.0228899	0.962576
IPO13	-0.036624	0.889658	0.627353	0.124186	0.627353	0.124186	0.124156	0.611863	0.619645	0.220759	0.619645	0.220759	0.071185	0.992554	-0.481909	0.364695	-0.481909	0.364695
IQCB1	-0.39853	0.243141	-1.36315	0.00673913	-1.36315	0.00673913	-0.122398	0.622592	-0.41153	0.361905	-0.41153	0.361905	0.023432	0.99545	0.512429	0.349331	0.512429	0.349331
ISG20L2	-0.346011	0.141574	-0.30075	0.440837	-0.30075	0.440837	0.0688099	0.686392	-0.211604	0.564797	-0.211604	0.564797	0.0865985	0.986141	0.0577458	0.909127	0.0577458	0.909127
ISOC2	0.208363	0.498839	1.04355	0.0298048	1.04355	0.0298048	-0.114854	0.589815	0.985802	0.0624022	0.985802	0.0624022	0.244833	0.972727	-0.367784	0.505901	-0.367784	0.505901
ITFG2	-0.695226	0.0207177	-0.42553	0.242488	-0.42553	0.242488	0.29966	0.426267	-0.273114	0.530945	-0.273114	0.530945	0.309002	0.972727	-0.0430099	0.927267	-0.0430099	0.927267
ITGAE	-0.00727109	0.985193	0.286614	0.498211	0.286614	0.498211	0.129207	0.523911	0.861738	0.10476	0.861738	0.10476	0.371513	0.972727	0.18173	0.738177	0.18173	0.738177
ITGB1BP1	-0.444563	0.0927307	-1.17696	0.00785636	-1.17696	0.00785636	0.21845	0.362323	0.449814	0.378079	0.449814	0.378079	0.111228	0.979877	0.549098	0.281854	0.549098	0.281854
ITPA	-0.349802	0.227363	0.391211	0.319428	0.391211	0.319428	0.150749	0.497754	0.929051	0.051447	0.929051	0.051447	0.277897	0.972727	-0.756347	0.217263	-0.756347	0.217263
JOSD1	0.15046	0.518946	0.0117449	0.977044	0.0117449	0.977044	0.255099	0.159011	0.129177	0.718403	0.129177	0.718403	-0.155805	0.972727	0.290076	0.551503	0.290076	0.551503
JOSD2	0.604802	0.119064	1.62433	0.00348266	1.62433	0.00348266	-0.0848215	0.636689	0.955657	0.0610942	0.955657	0.0610942	0.601651	0.972727	0.160701	0.770697	0.160701	0.770697
KCNG1	0.939465	0.00941786	1.37413	0.00638946	1.37413	0.00638946	-0.42984	0.34756	1.31204	0.100045	1.31204	0.100045	-0.333184	0.972727	-0.822308	0.207406	-0.822308	0.207406
KCNJ2	0.63468	0.177442	0.251765	0.591241	0.251765	0.591241	-0.314614	0.303632	0.00660275	0.988151	0.00660275	0.988151	-0.00162169	0.999144	-0.188371	0.754962	-0.188371	0.754962
KCTD11	-0.123687	0.656216	0.67865	0.088129	0.67865	0.088129	-0.637992	0.110535	0.241991	0.731329	0.241991	0.731329	0.195938	0.972727	-0.358999	0.466501	-0.358999	0.466501
KCTD2	-0.462274	0.0864661	-0.0900164	0.828949	-0.0900164	0.828949	0.178356	0.324933	0.220643	0.508087	0.220643	0.508087	0.0730773	0.992554	-0.258392	0.606972	-0.258392	0.606972
KIAA0141	-0.420046	0.0805041	-0.0677508	0.859579	-0.0677508	0.859579	-0.111424	0.576528	-0.0279528	0.945984	-0.0279528	0.945984	0.112334	0.972727	-0.313457	0.495265	-0.313457	0.495265
KIAA0513	0.369948	0.121308	0.68341	0.087141	0.68341	0.087141	-0.00766848	0.978764	-0.0112924	0.976877	-0.0112924	0.976877	-0.0434586	0.992557	-0.237701	0.626724	-0.237701	0.626724
KIF1C	0.0224615	0.937135	0.872958	0.0719628	0.872958	0.0719628	-0.146187	0.39305	0.411277	0.264389	0.411277	0.264389	0.0601475	0.992554	-0.580124	0.350731	-0.580124	0.350731
KIF22	-0.6517	0.0283154	0.0187588	0.960598	0.0187588	0.960598	0.0391858	0.886238	0.505044	0.208932	0.505044	0.208932	0.128928	0.972727	-0.471627	0.336966	-0.471627	0.336966
KIF3C	-0.887862	0.0163972	-1.06076	0.0136161	-1.06076	0.0136161	0.301796	0.149189	0.181191	0.627727	0.181191	0.627727	-0.111115	0.984012	0.216839	0.641834	0.216839	0.641834
KLHL13	-0.341371	0.369428	-1.81161	0.00894321	-1.81161	0.00894321	0.177146	0.298798	-0.439843	0.234826	-0.439843	0.234826	-0.137095	0.990269	0.608514	0.413157	0.608514	0.413157
KRT18	4.30516	6.8045e-05	5.46511	8.64352e-07	5.46511	8.64352e-07	NA	NA	NA	NA	NA	NA	0.0304668	0.992557	-0.990298	0.164765	-0.990298	0.164765
LAPTM5	3.40122	0.000850173	3.58209	0.000633959	3.58209	0.000633959	-0.393084	0.435081	0.163014	0.716715	0.163014	0.716715	-0.87793	0.972727	-0.810948	0.377027	-0.810948	0.377027
LARP6	0.153862	0.501835	0.358333	0.398275	0.358333	0.398275	0.247548	0.197171	0.663023	0.0760041	0.663023	0.0760041	-0.106548	0.977929	-0.544483	0.344068	-0.544483	0.344068
LBH	1.16309	0.00394407	0.937266	0.0292845	0.937266	0.0292845	-0.258868	0.209547	0.328301	0.374255	0.328301	0.374255	0.0452597	0.992557	0.165027	0.741437	0.165027	0.741437
LCMT1	-0.0333123	0.904425	0.456848	0.248574	0.456848	0.248574	0.250166	0.15236	0.453107	0.322428	0.453107	0.322428	0.0337046	0.992557	-0.350536	0.489079	-0.350536	0.489079
LDOC1L	-0.873145	0.0136963	-1.21377	0.00860584	-1.21377	0.00860584	0.286678	0.0951362	-0.215219	0.5523	-0.215219	0.5523	0.0307133	0.992557	0.277873	0.563565	0.277873	0.563565
LEMD1	-0.335706	0.527679	0.163857	0.702095	0.163857	0.702095	NA	NA	NA	NA	NA	NA	-0.0571373	0.994038	-0.940183	0.186505	-0.940183	0.186505
LETM2	-0.809575	0.0268783	-1.20492	0.0126823	-1.20492	0.0126823	0.0940809	0.682606	-0.272184	0.604797	-0.272184	0.604797	-0.0621511	0.992554	0.64478	0.271345	0.64478	0.271345
LIMK2	-0.520537	0.0664387	-0.134115	0.725714	-0.134115	0.725714	-0.261954	0.347166	0.118035	0.828848	0.118035	0.828848	0.0268583	0.994201	-0.242543	0.604571	-0.242543	0.604571
LITAF	1.39341	0.00138561	0.954246	0.0333709	0.954246	0.0333709	-0.400333	0.130792	-0.633635	0.145356	-0.633635	0.145356	-0.531612	0.972727	0.041524	0.937907	0.041524	0.937907
LMNB2	-0.558918	0.0713269	-0.0812124	0.842279	-0.0812124	0.842279	-0.124784	0.588633	0.752018	0.112062	0.752018	0.112062	0.169704	0.972727	-0.627521	0.262429	-0.627521	0.262429
LOC93622	-0.859288	0.00981749	-0.872467	0.0339106	-0.872467	0.0339106	0.262379	0.453989	0.645122	0.178096	0.645122	0.178096	0.28809	0.972727	0.251649	0.597328	0.251649	0.597328
LOH12CR1	0.146411	0.61804	0.512075	0.206581	0.512075	0.206581	0.0783829	0.678289	0.494319	0.311401	0.494319	0.311401	-0.332961	0.972727	-0.489208	0.364135	-0.489208	0.364135
LPXN	-0.00520111	0.987262	-0.00825124	0.98593	-0.00825124	0.98593	-0.289276	0.168074	0.19302	0.65812	0.19302	0.65812	-0.129054	0.979877	-0.147651	0.786845	-0.147651	0.786845
LRRC23	0.16257	0.560743	0.748487	0.0748255	0.748487	0.0748255	0.0542525	0.825546	0.342263	0.398656	0.342263	0.398656	-0.303896	0.972727	-0.582467	0.298531	-0.582467	0.298531
LRRC28	0.924503	0.00753778	1.65771	0.0014289	1.65771	0.0014289	0.211817	0.36257	-0.0561351	0.890787	-0.0561351	0.890787	-0.140415	0.972727	-0.367172	0.441488	-0.367172	0.441488
LRRC59	0.0973676	0.693838	0.168494	0.655231	0.168494	0.655231	0.20266	0.326912	-0.0651483	0.890688	-0.0651483	0.890688	-0.148261	0.972727	-0.182417	0.700305	-0.182417	0.700305
LSM1	-0.0473978	0.847856	-0.634735	0.101015	-0.634735	0.101015	-0.0922764	0.67192	0.210797	0.62696	0.210797	0.62696	0.0674653	0.992554	0.475361	0.34702	0.475361	0.34702
LSM10	0.39325	0.153957	1.23219	0.01838	1.23219	0.01838	0.0674534	0.658866	0.689821	0.110279	0.689821	0.110279	0.03269	0.992557	-0.47228	0.424345	-0.47228	0.424345
LSM2	-0.277159	0.274218	0.39715	0.3682	0.39715	0.3682	NA	NA	NA	NA	NA	NA	0.186625	0.972727	-0.0456168	0.937044	-0.0456168	0.937044
LSM4	-0.471837	0.140077	0.400204	0.382681	0.400204	0.382681	0.046614	0.843397	1.06636	0.024005	1.06636	0.024005	0.263121	0.972727	-0.212411	0.71911	-0.212411	0.71911
LSM5	-0.245974	0.351199	-0.209707	0.588717	-0.209707	0.588717	-0.308834	0.23334	0.194563	0.579722	0.194563	0.579722	0.20861	0.972727	0.0180507	0.973478	0.0180507	0.973478
LSM6	-0.601735	0.0593891	-1.03816	0.0172004	-1.03816	0.0172004	-0.173359	0.536555	1.13329	0.0825969	1.13329	0.0825969	0.0127799	0.99683	0.555013	0.294807	0.555013	0.294807
LSM7	-0.282206	0.4185	0.300564	0.513208	0.300564	0.513208	-0.280078	0.376618	0.754207	0.0507809	0.754207	0.0507809	0.302557	0.972727	-0.138959	0.813121	-0.138959	0.813121
LTBP2	-0.426224	0.177186	-0.163359	0.691862	-0.163359	0.691862	-0.499657	0.0932143	0.222917	0.68756	0.222917	0.68756	0.244195	0.972727	0.104298	0.839576	0.104298	0.839576
LYPLA2	-0.220094	0.405383	0.518082	0.221109	0.518082	0.221109	-0.0435534	0.853183	0.643297	0.214891	0.643297	0.214891	0.291614	0.972727	-0.60538	0.303018	-0.60538	0.303018
LYSMD1	-0.319775	0.21429	-0.0626137	0.874345	-0.0626137	0.874345	0.249283	0.530405	0.126554	0.811709	0.126554	0.811709	0.132864	0.972727	0.0657484	0.891773	0.0657484	0.891773
LZTR1	0.147934	0.608433	0.925145	0.0295464	0.925145	0.0295464	0.0542103	0.757758	1.03619	0.0742398	1.03619	0.0742398	0.0937663	0.991525	-0.566018	0.292594	-0.566018	0.292594
MAD2L2	-0.276789	0.33408	0.460456	0.274989	0.460456	0.274989	-0.457616	0.102614	0.651889	0.173287	0.651889	0.173287	0.217036	0.972727	-0.238966	0.656593	-0.238966	0.656593
MAF1	-0.338932	0.217458	0.574719	0.173953	0.574719	0.173953	0.0332441	0.944366	0.797202	0.201395	0.797202	0.201395	0.189929	0.972727	-0.249089	0.64018	-0.249089	0.64018
MANBAL	-0.0245694	0.93153	0.961129	0.0421464	0.961129	0.0421464	0.0870575	0.704383	0.795672	0.0920472	0.795672	0.0920472	0.136652	0.972727	-0.148958	0.79185	-0.148958	0.79185
MAP2	1.26062	0.0119676	0.132716	0.795747	0.132716	0.795747	0.113573	0.554051	-0.681035	0.220558	-0.681035	0.220558	-0.0285927	0.995093	0.921687	0.220797	0.921687	0.220797
MAP2K1	-0.659025	0.0284246	-1.10278	0.0150093	-1.10278	0.0150093	0.387737	0.0626321	0.639203	0.147898	0.639203	0.147898	-0.0414607	0.992557	-0.0904915	0.856348	-0.0904915	0.856348
MAP2K2	-0.084103	0.751419	0.709171	0.112734	0.709171	0.112734	0.136378	0.544651	1.0366	0.0184167	1.0366	0.0184167	0.131185	0.972727	-0.384318	0.489779	-0.384318	0.489779
MAP2K3	-0.307804	0.2282	0.152538	0.731768	0.152538	0.731768	-0.125662	0.689278	0.558987	0.191739	0.558987	0.191739	0.128822	0.972727	-0.401492	0.466501	-0.401492	0.466501
MAP2K4	0.100779	0.836244	-1.09588	0.022772	-1.09588	0.022772	0.514579	0.187743	-0.485952	0.179736	-0.485952	0.179736	-0.115743	0.992554	0.970459	0.185808	0.970459	0.185808
MAP3K9	0.759115	0.022854	0.631016	0.102051	0.631016	0.102051	0.411924	0.0484077	0.551341	0.225584	0.551341	0.225584	-0.455663	0.972727	-0.230826	0.627118	-0.230826	0.627118
MAPKAP1	0.366248	0.139183	-0.118856	0.756243	-0.118856	0.756243	0.0819248	0.800305	-0.456698	0.19171	-0.456698	0.19171	-0.0461788	0.992557	0.659822	0.230837	0.659822	0.230837
MAPKAPK3	0.0939232	0.732816	0.779092	0.120781	0.779092	0.120781	0.175231	0.641095	0.425266	0.545548	0.425266	0.545548	0.191358	0.972727	-0.164129	0.795582	-0.164129	0.795582
MARCKSL1	-1.17703	0.00855816	-0.771295	0.0853997	-0.771295	0.0853997	0.095756	0.651126	0.814464	0.0779677	0.814464	0.0779677	0.432638	0.972727	-0.214981	0.69634	-0.214981	0.69634
MARK4	-0.0141419	0.958831	0.61165	0.16545	0.61165	0.16545	0.183659	0.387173	0.226636	0.567512	0.226636	0.567512	-0.00298062	0.998986	-0.397189	0.47775	-0.397189	0.47775
MBD3	-0.875988	0.028611	-0.0862747	0.849823	-0.0862747	0.849823	-0.394636	0.211982	0.849092	0.0231667	0.849092	0.0231667	0.402989	0.972727	-0.091966	0.868489	-0.091966	0.868489
MBD6	-0.433631	0.137347	0.144375	0.743036	0.144375	0.743036	0.446207	0.159641	-0.330502	0.450635	-0.330502	0.450635	0.286254	0.972727	0.139032	0.798967	0.139032	0.798967
MCAM	0.933916	0.0157001	1.39386	0.00479422	1.39386	0.00479422	-0.692394	0.00780937	0.624359	0.411442	0.624359	0.411442	-0.408702	0.972727	-0.706111	0.228928	-0.706111	0.228928
MCOLN1	0.414848	0.169398	1.4176	0.00472857	1.4176	0.00472857	-0.0865699	0.756113	1.01007	0.083036	1.01007	0.083036	0.360526	0.972727	-0.425014	0.40858	-0.425014	0.40858
MCRS1	-0.736823	0.0345908	0.122959	0.773307	0.122959	0.773307	-0.103125	0.67836	0.810929	0.146223	0.810929	0.146223	0.290582	0.972727	-0.234489	0.649882	-0.234489	0.649882
MCTS1	0.165943	0.570735	0.00640585	0.988122	0.00640585	0.988122	0.297904	0.0890358	0.438577	0.219972	0.438577	0.219972	-0.0638347	0.992554	-0.262526	0.596988	-0.262526	0.596988
MDFI	-1.24954	0.00534444	-0.276058	0.542919	-0.276058	0.542919	NA	NA	NA	NA	NA	NA	0.0309889	0.993633	-0.483448	0.411784	-0.483448	0.411784
MDH2	-0.0522548	0.836484	0.910801	0.0274696	0.910801	0.0274696	0.178285	0.335372	0.684831	0.178309	0.684831	0.178309	0.126602	0.972727	-0.776191	0.201283	-0.776191	0.201283
MEA1	-0.476351	0.193143	0.298806	0.515542	0.298806	0.515542	-0.00466804	0.987494	0.608919	0.121042	0.608919	0.121042	0.2665	0.972727	-0.00230561	0.996847	-0.00230561	0.996847
MECR	-0.149383	0.573675	0.995172	0.0294166	0.995172	0.0294166	0.0294422	0.881703	0.66797	0.165494	0.66797	0.165494	0.206363	0.972727	-0.804759	0.213445	-0.804759	0.213445
MED11	-0.318006	0.21902	-0.419312	0.304062	-0.419312	0.304062	-0.00742779	0.985532	0.398049	0.295278	0.398049	0.295278	0.159164	0.972727	-0.28212	0.587554	-0.28212	0.587554
MED28	-0.297858	0.239865	-0.931053	0.0244432	-0.931053	0.0244432	-0.164893	0.339317	-1.03471	0.00535564	-1.03471	0.00535564	0.145883	0.972727	0.832575	0.186555	0.832575	0.186555
MED8	0.324372	0.157374	0.239555	0.531338	0.239555	0.531338	-0.0082024	0.976277	0.378418	0.371484	0.378418	0.371484	-0.253616	0.972727	-0.00818141	0.988692	-0.00818141	0.988692
MESDC1	-0.0991418	0.741218	0.268455	0.545441	0.268455	0.545441	0.36327	0.166592	0.921497	0.0353205	0.921497	0.0353205	0.27913	0.972727	-0.191729	0.736346	-0.191729	0.736346
MEST	1.66486	0.000987392	1.06089	0.0176754	1.06089	0.0176754	0.288271	0.170892	-0.0953011	0.781733	-0.0953011	0.781733	-0.145809	0.972727	0.72848	0.222116	0.72848	0.222116
METTL6	-0.241325	0.334941	-0.111048	0.790944	-0.111048	0.790944	0.0798248	0.677764	0.415033	0.272259	0.415033	0.272259	0.310032	0.972727	0.589352	0.291687	0.589352	0.291687
MFI2	1.04086	0.0169074	1.98503	0.000850022	1.98503	0.000850022	0.231137	0.57316	0.724966	0.105398	0.724966	0.105398	-0.315704	0.972727	-1.0547	0.164621	-1.0547	0.164621
MICA	4.08477	6.8045e-05	5.20181	1.44464e-06	5.20181	1.44464e-06	NA	NA	NA	NA	NA	NA	-0.438595	0.972727	-1.13471	0.155682	-1.13471	0.155682
MID1IP1	-0.18878	0.442218	0.17381	0.639412	0.17381	0.639412	0.00921936	0.982142	0.384057	0.509392	0.384057	0.509392	-0.101828	0.984012	-0.553833	0.282724	-0.553833	0.282724
MIF4GD	0.153923	0.577123	0.898624	0.0553194	0.898624	0.0553194	-0.392703	0.156353	0.363129	0.468531	0.363129	0.468531	-0.163092	0.972727	-0.712686	0.263764	-0.712686	0.263764
MKKS	0.581798	0.0474928	-0.93583	0.0250561	-0.93583	0.0250561	0.103889	0.51711	0.466985	0.259169	0.466985	0.259169	-0.0210083	0.994957	0.721291	0.214898	0.721291	0.214898
MKNK1	0.0757071	0.750359	0.354326	0.324742	0.354326	0.324742	-0.173542	0.339771	0.0349945	0.916184	0.0349945	0.916184	0.0267737	0.992767	-0.402283	0.396641	-0.402283	0.396641
MLF2	0.0837307	0.754905	0.646611	0.130946	0.646611	0.130946	-0.0171968	0.940296	0.615025	0.242106	0.615025	0.242106	0.165482	0.972727	-0.399762	0.459809	-0.399762	0.459809
MLX	0.472162	0.0719445	0.804679	0.0553677	0.804679	0.0553677	-0.0424817	0.858825	0.157907	0.693806	0.157907	0.693806	-0.0148775	0.99545	-0.238877	0.633911	-0.238877	0.633911
MMP14	2.11567	0.00109361	3.49654	9.49576e-05	3.49654	9.49576e-05	NA	NA	NA	NA	NA	NA	-0.735296	0.972727	-0.911683	0.232597	-0.911683	0.232597
MOCS2	0.360895	0.265576	-0.850259	0.0350313	-0.850259	0.0350313	-0.035854	0.829993	-0.480688	0.297943	-0.480688	0.297943	-0.015414	0.996668	0.843177	0.184474	0.843177	0.184474
MON1B	0.196864	0.410483	0.463859	0.229133	0.463859	0.229133	0.140107	0.497369	0.0318683	0.931619	0.0318683	0.931619	0.0355485	0.992557	-0.333282	0.497868	-0.333282	0.497868
MPG	0.369964	0.185682	1.22315	0.0143762	1.22315	0.0143762	-0.0845247	0.754446	1.00916	0.0472343	1.00916	0.0472343	0.124951	0.979818	-0.374385	0.49341	-0.374385	0.49341
MPI	0.0647679	0.802856	0.904854	0.030393	0.904854	0.030393	0.196339	0.222019	0.493789	0.269697	0.493789	0.269697	0.00979748	0.997152	-0.971803	0.16771	-0.971803	0.16771
MPST	-0.655222	0.0498601	0.277707	0.495811	0.277707	0.495811	0.120305	0.673228	0.504487	0.305984	0.504487	0.305984	0.273902	0.972727	-0.534597	0.333778	-0.534597	0.333778
MPV17	-0.855279	0.0178851	-0.154758	0.718713	-0.154758	0.718713	0.118938	0.497028	0.314766	0.515689	0.314766	0.515689	0.0711964	0.992554	-0.378457	0.477862	-0.378457	0.477862
MRPL11	-0.519649	0.128272	0.361798	0.42517	0.361798	0.42517	-0.232132	0.246196	0.687	0.141556	0.687	0.141556	0.379163	0.972727	-0.147948	0.80067	-0.147948	0.80067
MRPL12	-0.0469665	0.886001	0.625974	0.1705	0.625974	0.1705	-0.0241506	0.918904	1.06749	0.05857	1.06749	0.05857	0.270614	0.972727	-0.347044	0.545207	-0.347044	0.545207
MRPL14	-0.353883	0.318798	0.188129	0.669768	0.188129	0.669768	0.0397492	0.828313	0.853732	0.0332911	0.853732	0.0332911	0.225269	0.972727	-0.132052	0.811163	-0.132052	0.811163
MRPL18	-0.0924036	0.739459	-0.103832	0.798976	-0.103832	0.798976	-0.123464	0.60401	1.03118	0.079365	1.03118	0.079365	0.110491	0.983827	0.272385	0.580144	0.272385	0.580144
MRPL2	0.0564199	0.81162	0.897364	0.0277391	0.897364	0.0277391	0.0400837	0.844783	0.619437	0.108489	0.619437	0.108489	0.058308	0.992554	-0.829415	0.186505	-0.829415	0.186505
MRPL21	-0.0146238	0.960263	0.365059	0.408434	0.365059	0.408434	0.291884	0.167556	0.784865	0.0893832	0.784865	0.0893832	0.25229	0.972727	-0.117971	0.835416	-0.117971	0.835416
MRPL23	-0.518097	0.104353	0.449638	0.297694	0.449638	0.297694	NA	NA	NA	NA	NA	NA	0.410544	0.972727	-0.288805	0.599501	-0.288805	0.599501
MRPL24	-0.0634648	0.830149	0.66213	0.0902015	0.66213	0.0902015	0.0359041	0.884168	0.346771	0.361231	0.346771	0.361231	0.16595	0.972727	-0.802512	0.198359	-0.802512	0.198359
MRPL27	-0.195101	0.517731	0.253622	0.526468	0.253622	0.526468	-0.147207	0.497536	0.620281	0.156171	0.620281	0.156171	0.204991	0.972727	-0.450227	0.390485	-0.450227	0.390485
MRPL28	0.188025	0.497268	1.06594	0.0151687	1.06594	0.0151687	-0.0859267	0.723317	0.581672	0.181397	0.581672	0.181397	0.204761	0.972727	-0.858644	0.185846	-0.858644	0.185846
MRPL30	-0.499723	0.0624447	-1.11939	0.0116769	-1.11939	0.0116769	0.119381	0.509994	-0.496301	0.191441	-0.496301	0.191441	0.203947	0.972727	0.122482	0.799329	0.122482	0.799329
MRPL34	0.257048	0.418983	0.564677	0.226311	0.564677	0.226311	-0.243022	0.138869	0.581898	0.24886	0.581898	0.24886	0.103262	0.992554	-0.231862	0.697187	-0.231862	0.697187
MRPL37	-0.238704	0.340402	0.555238	0.187849	0.555238	0.187849	0.272535	0.198258	0.327249	0.483499	0.327249	0.483499	0.277863	0.972727	-0.49333	0.372978	-0.49333	0.372978
MRPL4	-0.190417	0.499301	0.521304	0.178233	0.521304	0.178233	0.0120178	0.956647	0.99153	0.0513535	0.99153	0.0513535	0.223476	0.972727	-0.445619	0.379181	-0.445619	0.379181
MRPL41	0.287757	0.388141	1.14939	0.0219745	1.14939	0.0219745	0.173248	0.677138	0.819678	0.164182	0.819678	0.164182	0.264383	0.972727	-0.234001	0.678323	-0.234001	0.678323
MRPL43	0.0732602	0.819888	0.76512	0.0759624	0.76512	0.0759624	0.0450903	0.739278	0.854602	0.124315	0.854602	0.124315	0.175166	0.972727	-0.262296	0.61584	-0.262296	0.61584
MRPL51	-0.187794	0.537505	0.0476361	0.908313	0.0476361	0.908313	-0.06828	0.753726	0.219013	0.56487	0.219013	0.56487	0.152552	0.973712	-0.00820405	0.988881	-0.00820405	0.988881
MRPL52	-0.0457949	0.870962	0.532441	0.221235	0.532441	0.221235	0.116088	0.494879	0.779111	0.0690792	0.779111	0.0690792	0.238616	0.972727	-0.108242	0.846136	-0.108242	0.846136
MRPL53	0.123621	0.66245	0.964116	0.0392786	0.964116	0.0392786	-0.00279544	0.990729	0.75071	0.142739	0.75071	0.142739	0.145867	0.972727	-0.246977	0.651614	-0.246977	0.651614
MRPL54	-0.401564	0.254307	0.40467	0.357886	0.40467	0.357886	-0.0545932	0.795834	0.75209	0.0467681	0.75209	0.0467681	0.420116	0.972727	-0.112372	0.843011	-0.112372	0.843011
MRPL55	0.101784	0.762602	0.863844	0.05231	0.863844	0.05231	0.00838717	0.968092	0.825659	0.0425781	0.825659	0.0425781	0.242936	0.972727	-0.527168	0.348067	-0.527168	0.348067
MRPS11	-0.276382	0.366348	0.477494	0.236361	0.477494	0.236361	0.00545906	0.981721	0.661692	0.133926	0.661692	0.133926	0.305125	0.972727	-0.325449	0.525	-0.325449	0.525
MRPS12	0.203604	0.496764	0.939449	0.0443303	0.939449	0.0443303	-0.0847556	0.732692	0.760007	0.0824974	0.760007	0.0824974	0.263791	0.972727	-0.217705	0.693686	-0.217705	0.693686
MRPS14	0.366529	0.135156	0.654672	0.0962283	0.654672	0.0962283	-0.260175	0.316277	0.085841	0.850269	0.085841	0.850269	-0.0634868	0.992554	-0.284728	0.555379	-0.284728	0.555379
MRPS15	-0.000184039	0.999564	0.170779	0.655784	0.170779	0.655784	0.107054	0.525432	0.611357	0.199386	0.611357	0.199386	0.104338	0.986152	0.106987	0.824388	0.106987	0.824388
MRPS16	-0.168232	0.524718	0.254958	0.525914	0.254958	0.525914	0.15711	0.355984	0.525552	0.18788	0.525552	0.18788	0.0276611	0.994406	0.0781772	0.880347	0.0781772	0.880347
MRPS17	-0.0686561	0.820571	-0.348188	0.397458	-0.348188	0.397458	-0.0509783	0.789954	0.459479	0.340758	0.459479	0.340758	0.110343	0.985621	0.00458529	0.994564	0.00458529	0.994564
MRPS18A	-0.231805	0.392971	0.535946	0.191992	0.535946	0.191992	0.0941383	0.670494	0.840481	0.0504398	0.840481	0.0504398	0.209767	0.972727	-0.658462	0.265113	-0.658462	0.265113
MRPS2	-0.529674	0.0668887	0.299996	0.433426	0.299996	0.433426	0.0535399	0.750849	0.932028	0.0733542	0.932028	0.0733542	0.274712	0.972727	-0.62681	0.26112	-0.62681	0.26112
MRPS21	0.0311992	0.925942	0.289385	0.428119	0.289385	0.428119	0.0499079	0.773936	0.394154	0.375382	0.394154	0.375382	0.129863	0.982799	-0.156249	0.74075	-0.156249	0.74075
MRPS23	-0.0503637	0.855506	0.18963	0.61187	0.18963	0.61187	0.146381	0.30121	0.371343	0.422362	0.371343	0.422362	0.13396	0.972727	-0.625436	0.248833	-0.625436	0.248833
MRPS26	-0.723088	0.0353335	-0.207971	0.622021	-0.207971	0.622021	-0.00769363	0.970401	0.780746	0.107435	0.780746	0.107435	0.220092	0.972727	-0.101394	0.848834	-0.101394	0.848834
MRPS33	-0.175361	0.501835	-0.0908125	0.820168	-0.0908125	0.820168	0.296012	0.254396	0.104671	0.775068	0.104671	0.775068	-0.114201	0.980068	-0.108074	0.824406	-0.108074	0.824406
MRPS34	-0.166406	0.581723	0.357691	0.417731	0.357691	0.417731	-0.190652	0.48122	1.19796	0.00777056	1.19796	0.00777056	0.280097	0.972727	-0.387105	0.493581	-0.387105	0.493581
MRPS7	-0.236834	0.413722	0.242029	0.515667	0.242029	0.515667	0.102608	0.602768	0.768357	0.107556	0.768357	0.107556	0.187725	0.972727	-0.370006	0.44035	-0.370006	0.44035
MRRF	-0.548477	0.0374005	-0.853437	0.0434388	-0.853437	0.0434388	-0.385731	0.0711439	-0.389018	0.265156	-0.389018	0.265156	0.0993787	0.979877	0.242814	0.625196	0.242814	0.625196
MSRB3	0.695062	0.0405631	-0.12522	0.739152	-0.12522	0.739152	-0.556967	0.0292274	-0.41973	0.467898	-0.41973	0.467898	0.257489	0.972727	0.75932	0.200538	0.75932	0.200538
MSTO1	-0.323951	0.569088	0.204786	0.65056	0.204786	0.65056	-0.32909	0.545106	-0.477777	0.363775	-0.477777	0.363775	0.202856	0.990269	-0.0202614	0.974095	-0.0202614	0.974095
MT1X	-1.68673	0.0142706	-1.88961	0.00144892	-1.88961	0.00144892	-0.459745	0.108788	0.0635218	0.901817	0.0635218	0.901817	0.609896	0.972727	1.12267	0.163435	1.12267	0.163435
MTCH1	0.0113	0.966532	0.833359	0.0677345	0.833359	0.0677345	0.413552	0.281208	1.06775	0.0494864	1.06775	0.0494864	0.184186	0.972727	-0.371089	0.501199	-0.371089	0.501199
MTFR1	1.11417	0.018443	0.129728	0.763788	0.129728	0.763788	-0.828231	0.0178849	-1.47154	0.00535662	-1.47154	0.00535662	-0.242767	0.972727	0.520745	0.348666	0.520745	0.348666
MTG1	-0.553974	0.0889396	0.134666	0.746356	0.134666	0.746356	-0.0911489	0.73307	0.446301	0.30493	0.446301	0.30493	0.43423	0.972727	-0.35579	0.486617	-0.35579	0.486617
MTHFD2	0.621962	0.0443159	-0.335398	0.407416	-0.335398	0.407416	0.20755	0.552803	-0.705097	0.133105	-0.705097	0.133105	-0.239605	0.972727	0.277317	0.591104	0.277317	0.591104
MTX2	0.00811479	0.97818	-1.07852	0.0146226	-1.07852	0.0146226	0.250025	0.158967	0.818001	0.106913	0.818001	0.106913	-0.145699	0.972727	0.0745078	0.879664	0.0745078	0.879664
MUTYH	-1.43937	0.00271021	-0.455404	0.220146	-0.455404	0.220146	-0.443834	0.379539	0.264225	0.633732	0.264225	0.633732	0.27799	0.972727	-0.493815	0.329689	-0.493815	0.329689
MXRA7	0.798443	0.0196757	1.22874	0.0090929	1.22874	0.0090929	0.59189	0.0941722	0.909659	0.0782825	0.909659	0.0782825	0.0317245	0.992557	0.152873	0.761464	0.152873	0.761464
MYL5	-0.383458	0.195483	0.300257	0.497124	0.300257	0.497124	0.788932	0.0515779	0.545865	0.209867	0.545865	0.209867	0.330161	0.972727	0.0756315	0.895307	0.0756315	0.895307
MYL6	0.324012	0.284419	0.995671	0.0327237	0.995671	0.0327237	-0.121726	0.507182	0.58698	0.120532	0.58698	0.120532	0.270063	0.972727	-0.616931	0.297147	-0.616931	0.297147
MYL6B	-0.284642	0.402099	0.837237	0.0697953	0.837237	0.0697953	0.0654699	0.701006	0.684607	0.172514	0.684607	0.172514	0.194321	0.972727	-0.392952	0.4849	-0.392952	0.4849
NADK	-0.266495	0.284881	-0.0407524	0.925966	-0.0407524	0.925966	-0.175298	0.523485	-0.47075	0.298569	-0.47075	0.298569	0.0240721	0.994516	-0.102806	0.843681	-0.102806	0.843681
NANS	-0.0597891	0.836791	0.576086	0.126199	0.576086	0.126199	-0.0802004	0.738108	0.797335	0.0755307	0.797335	0.0755307	-0.0867658	0.992554	-0.767485	0.20173	-0.767485	0.20173
NARF	-0.298683	0.271818	0.290598	0.472413	0.290598	0.472413	0.15229	0.469995	0.638708	0.134705	0.638708	0.134705	0.243949	0.972727	-0.193134	0.709379	-0.193134	0.709379
NARS2	-0.204534	0.511721	-1.12672	0.0325736	-1.12672	0.0325736	-0.00190958	0.995291	-0.834165	0.195781	-0.834165	0.195781	-0.0540756	0.992557	0.624632	0.336566	0.624632	0.336566
NAT6	-0.0218206	0.941543	0.701434	0.0834759	0.701434	0.0834759	-0.362041	0.252779	1.08661	0.0394291	1.08661	0.0394291	-0.0917375	0.991525	-0.628822	0.264683	-0.628822	0.264683
NCK2	-0.228466	0.372553	-0.88092	0.0281857	-0.88092	0.0281857	0.079	0.753972	0.25099	0.467309	0.25099	0.467309	-0.1356	0.972727	0.678711	0.221628	0.678711	0.221628
NCKIPSD	-0.409034	0.131721	0.182758	0.632324	0.182758	0.632324	0.15807	0.542853	0.482641	0.42366	0.482641	0.42366	0.108965	0.981228	-0.382843	0.432334	-0.382843	0.432334
NDUFA1	0.294266	0.440674	0.512628	0.174038	0.512628	0.174038	-0.0279615	0.92994	0.78996	0.0436337	0.78996	0.0436337	0.109382	0.992554	0.40098	0.410658	0.40098	0.410658
NDUFA11	-0.078954	0.826781	0.715453	0.105263	0.715453	0.105263	0.0756129	0.663865	0.928699	0.0262305	0.928699	0.0262305	0.270728	0.972727	-0.272246	0.61626	-0.272246	0.61626
NDUFA13	0.162649	0.641476	0.709974	0.110328	0.709974	0.110328	-0.00160949	0.993799	0.710922	0.0518873	0.710922	0.0518873	0.212192	0.972727	-0.206194	0.709379	-0.206194	0.709379
NDUFA2	-0.0087433	0.982457	0.775383	0.0929912	0.775383	0.0929912	0.172301	0.50111	0.758174	0.0753043	0.758174	0.0753043	0.223123	0.972727	-0.115696	0.839647	-0.115696	0.839647
NDUFA3	0.222925	0.576339	1.00027	0.0277289	1.00027	0.0277289	NA	NA	NA	NA	NA	NA	0.20862	0.972727	-0.403133	0.444611	-0.403133	0.444611
NDUFA6	-0.675435	0.0336458	-0.627558	0.123742	-0.627558	0.123742	NA	NA	NA	NA	NA	NA	0.516961	0.972727	-0.155788	0.762428	-0.155788	0.762428
NDUFA7	0.243372	0.396425	0.858995	0.0629774	0.858995	0.0629774	-0.260004	0.430949	0.942714	0.0424528	0.942714	0.0424528	0.103783	0.990269	-0.264873	0.633684	-0.264873	0.633684
NDUFA8	0.109149	0.721683	0.212076	0.575664	0.212076	0.575664	0.0565632	0.802551	0.545564	0.21086	0.545564	0.21086	-0.0147972	0.996632	-0.287868	0.54626	-0.287868	0.54626
NDUFAF1	1.02813	0.00657243	0.670195	0.148894	0.670195	0.148894	0.157015	0.539007	0.103524	0.814396	0.103524	0.814396	-0.21657	0.972727	-0.0115138	0.9867	-0.0115138	0.9867
NDUFB1	-0.0761602	0.815058	0.821346	0.0797858	0.821346	0.0797858	0.019921	0.920483	0.652544	0.185762	0.652544	0.185762	0.15076	0.974169	-0.0958713	0.868532	-0.0958713	0.868532
NDUFB10	0.0346796	0.923266	0.823061	0.0703539	0.823061	0.0703539	0.0635682	0.683052	0.696962	0.10339	0.696962	0.10339	0.181901	0.972727	-0.17799	0.75065	-0.17799	0.75065
NDUFB2	-0.193948	0.5889	0.528854	0.230209	0.528854	0.230209	-0.223272	0.43647	0.520825	0.208594	0.520825	0.208594	0.298442	0.972727	-0.0671259	0.906322	-0.0671259	0.906322
NDUFB7	0.124647	0.718246	1.04635	0.0334802	1.04635	0.0334802	-0.194864	0.517568	0.682284	0.0740331	0.682284	0.0740331	0.318228	0.972727	-0.166413	0.774154	-0.166413	0.774154
NDUFS6	-0.153568	0.682665	0.496475	0.281566	0.496475	0.281566	0.00747648	0.970276	0.869837	0.0251934	0.869837	0.0251934	0.143671	0.984251	-0.204756	0.730384	-0.204756	0.730384
NDUFS7	0.0720078	0.81864	0.954464	0.0289537	0.954464	0.0289537	0.11432	0.576747	0.925635	0.0647557	0.925635	0.0647557	0.224872	0.972727	-0.573538	0.297097	-0.573538	0.297097
NDUFS8	0.140587	0.645774	0.933741	0.0377146	0.933741	0.0377146	-0.119253	0.572749	0.691412	0.101458	0.691412	0.101458	0.18147	0.972727	-0.350534	0.504439	-0.350534	0.504439
NDUFV3	0.350912	0.17667	0.368463	0.305968	0.368463	0.305968	0.0415034	0.799444	0.513499	0.182385	0.513499	0.182385	0.0711483	0.992554	-0.079898	0.863976	-0.079898	0.863976
NEDD8	0.225988	0.518592	0.747663	0.0712378	0.747663	0.0712378	0.0845671	0.781156	0.894625	0.0294207	0.894625	0.0294207	0.164073	0.976876	0.113192	0.823223	0.113192	0.823223
NEK6	1.12191	0.00619338	1.53117	0.00328025	1.53117	0.00328025	0.037611	0.861647	-0.0156737	0.9718	-0.0156737	0.9718	-0.149378	0.972727	-0.463002	0.376849	-0.463002	0.376849
NET1	0.299126	0.30834	-0.988408	0.0544944	-0.988408	0.0544944	-0.135624	0.58601	-0.401092	0.378037	-0.401092	0.378037	-0.119646	0.984012	0.886547	0.226958	0.886547	0.226958
NETO2	0.0106534	0.971051	-1.29964	0.00563672	-1.29964	0.00563672	0.356108	0.241769	0.147163	0.686122	0.147163	0.686122	0.213986	0.972727	1.4983	0.119752	1.4983	0.119752
NFKBIE	-0.0116936	0.963077	0.689276	0.113842	0.689276	0.113842	0.348712	0.142787	0.758907	0.141004	0.758907	0.141004	-0.0739535	0.992554	-0.939995	0.191339	-0.939995	0.191339
NGRN	-0.203031	0.408165	-0.419376	0.267294	-0.419376	0.267294	0.0628716	0.723373	0.257684	0.506851	0.257684	0.506851	-0.0300234	0.992557	0.108235	0.823733	0.108235	0.823733
NIT1	0.264858	0.252929	0.917113	0.0255359	0.917113	0.0255359	0.0889173	0.663852	0.58785	0.231716	0.58785	0.231716	-0.101248	0.980068	-0.844491	0.182891	-0.844491	0.182891
NKIRAS2	-0.0887335	0.735958	0.665815	0.155177	0.665815	0.155177	-0.00951703	0.956142	0.20267	0.550809	0.20267	0.550809	0.161128	0.972727	-0.208119	0.725974	-0.208119	0.725974
NME1	-0.602796	0.103426	0.0273131	0.950381	0.0273131	0.950381	0.00906391	0.956806	0.602004	0.125842	0.602004	0.125842	0.399344	0.972727	-0.381938	0.470152	-0.381938	0.470152
NME1-NME2	0.559957	0.298402	0.718647	0.197039	0.718647	0.197039	NA	NA	NA	NA	NA	NA	-0.26508	0.974689	-0.215218	0.764025	-0.215218	0.764025
NME2	-0.00131632	0.996632	-0.0698857	0.881305	-0.0698857	0.881305	0.0361353	0.881331	1.43146	0.0385735	1.43146	0.0385735	-0.0864918	0.992554	0.672239	0.280561	0.672239	0.280561
NME4	0.113653	0.722966	1.26617	0.0106868	1.26617	0.0106868	-0.515387	0.0466863	0.141861	0.75602	0.141861	0.75602	0.272407	0.972727	-0.366761	0.488929	-0.366761	0.488929
NMNAT1	0.202116	0.456181	0.0912108	0.850598	0.0912108	0.850598	-0.0565626	0.824585	0.671452	0.135963	0.671452	0.135963	-0.0357265	0.992557	-0.21243	0.717416	-0.21243	0.717416
NMNAT2	1.53709	0.00186121	0.865249	0.0464817	0.865249	0.0464817	0.274641	0.222422	-0.502305	0.16471	-0.502305	0.16471	-0.13001	0.974133	0.438449	0.406488	0.438449	0.406488
NOL3	0.511238	0.0621248	1.66116	0.00204403	1.66116	0.00204403	-0.249828	0.476349	0.849355	0.128378	0.849355	0.128378	-0.0363637	0.992557	-1.2353	0.136783	-1.2353	0.136783
NOSIP	-0.328049	0.273239	0.506745	0.16976	0.506745	0.16976	0.0779703	0.765019	0.721541	0.0976082	0.721541	0.0976082	0.323652	0.972727	-0.642753	0.237948	-0.642753	0.237948
NOTCH2NL	0.926947	0.00658408	1.34848	0.00729724	1.34848	0.00729724	NA	NA	NA	NA	NA	NA	-0.294678	0.972727	-0.45965	0.391512	-0.45965	0.391512
NPM3	-0.457576	0.103432	0.198124	0.637166	0.198124	0.637166	-0.051679	0.817157	0.63837	0.155794	0.63837	0.155794	0.124296	0.9756	-0.409001	0.444421	-0.409001	0.444421
NQO1	2.25562	0.000270193	2.89865	4.34382e-05	2.89865	4.34382e-05	0.0715367	0.818937	0.270207	0.588745	0.270207	0.588745	-0.138534	0.972727	-0.97826	0.167042	-0.97826	0.167042
NR1H2	0.105253	0.714687	0.470799	0.279506	0.470799	0.279506	-0.306403	0.456985	0.85349	0.0768338	0.85349	0.0768338	0.199328	0.972727	-0.108653	0.846314	-0.108653	0.846314
NR1H3	0.206357	0.388989	0.813642	0.074872	0.813642	0.074872	0.17198	0.646897	1.06969	0.0515189	1.06969	0.0515189	-0.236545	0.972727	-0.685068	0.272443	-0.685068	0.272443
NRAS	0.397012	0.381216	-0.912716	0.042643	-0.912716	0.042643	-0.11658	0.559982	-0.150875	0.692198	-0.150875	0.692198	-0.107498	0.992554	1.0044	0.175803	1.0044	0.175803
NRBP1	-0.747097	0.0185216	-0.326366	0.368321	-0.326366	0.368321	0.00515756	0.97588	-0.31203	0.350125	-0.31203	0.350125	-0.0116369	0.996668	-0.571467	0.27304	-0.571467	0.27304
NRF1	-0.766249	0.0211141	-0.734923	0.0602854	-0.734923	0.0602854	0.00805755	0.972309	0.039441	0.922346	0.039441	0.922346	0.0813022	0.992554	-0.0134106	0.979815	-0.0134106	0.979815
NRG1	-0.266495	0.22748	-0.807089	0.0459828	-0.807089	0.0459828	0.942744	0.0354109	-0.0755413	0.859603	-0.0755413	0.859603	0.0138489	0.99545	0.617783	0.257939	0.617783	0.257939
NSFL1C	-0.456752	0.0718664	-0.0462561	0.904923	-0.0462561	0.904923	-0.0053794	0.986364	0.106704	0.778108	0.106704	0.778108	0.113624	0.973953	-0.404762	0.395038	-0.404762	0.395038
NSMCE1	-1.46286	0.0025506	-0.92275	0.0342183	-0.92275	0.0342183	-0.0965273	0.604121	0.50742	0.163255	0.50742	0.163255	0.118813	0.980068	-0.654151	0.257939	-0.654151	0.257939
NT5DC2	-1.12213	0.00628421	-0.238534	0.55508	-0.238534	0.55508	0.194231	0.566723	0.589228	0.15999	0.589228	0.15999	0.211178	0.972727	-0.384148	0.458876	-0.384148	0.458876
NT5DC3	0.295036	0.266566	-0.140491	0.736764	-0.140491	0.736764	0.447773	0.252252	0.218048	0.567862	0.218048	0.567862	-0.00467552	0.998081	0.0483825	0.925777	0.0483825	0.925777
NUBP1	-0.698259	0.0429518	-0.564211	0.147153	-0.564211	0.147153	-0.264869	0.270375	0.195928	0.561554	0.195928	0.561554	0.203651	0.972727	-0.348566	0.478273	-0.348566	0.478273
NUBP2	-0.50464	0.113324	0.357317	0.373807	0.357317	0.373807	-0.0581881	0.845227	0.758217	0.0791535	0.758217	0.0791535	0.35094	0.972727	-0.315009	0.539284	-0.315009	0.539284
NUDC	-0.35753	0.1625	-0.0938801	0.807306	-0.0938801	0.807306	-0.0582138	0.76013	0.251868	0.521581	0.251868	0.521581	0.0647961	0.992554	-0.54088	0.291687	-0.54088	0.291687
NUDCD2	-0.127664	0.595431	-0.218037	0.554618	-0.218037	0.554618	-0.251667	0.296037	0.54785	0.188285	0.54785	0.188285	0.106159	0.980068	0.52184	0.30667	0.52184	0.30667
NUDT16L1	-0.122444	0.709697	0.740718	0.0808296	0.740718	0.0808296	-0.027542	0.878598	1.03122	0.0669257	1.03122	0.0669257	0.383787	0.972727	-0.595592	0.295195	-0.595592	0.295195
NUDT21	-0.266837	0.394555	-1.43478	0.00499262	-1.43478	0.00499262	0.0546522	0.743876	-0.302822	0.438838	-0.302822	0.438838	0.0656467	0.992554	0.280402	0.582936	0.280402	0.582936
NUDT22	0.150347	0.567512	1.40694	0.00669527	1.40694	0.00669527	0.0439948	0.896392	0.929877	0.0571853	0.929877	0.0571853	0.235059	0.972727	-0.55621	0.330555	-0.55621	0.330555
NUDT3	-1.07107	0.0172088	-0.0715943	0.87946	-0.0715943	0.87946	0.319439	0.571122	0.452732	0.385523	0.452732	0.385523	0.369325	0.972727	-0.494757	0.395132	-0.494757	0.395132
NXT1	-0.380089	0.211862	0.202457	0.63423	0.202457	0.63423	-0.0830779	0.770151	1.19047	0.0541607	1.19047	0.0541607	0.0327644	0.993633	-0.126884	0.81366	-0.126884	0.81366
OAF	1.56365	0.00127991	2.22032	0.000846968	2.22032	0.000846968	-1.05315	0.0268443	-0.286106	0.629643	-0.286106	0.629643	-0.304296	0.972727	-0.573237	0.346966	-0.573237	0.346966
OAZ2	-0.0460711	0.879108	0.211703	0.60943	0.211703	0.60943	-0.105385	0.694817	0.922383	0.0700725	0.922383	0.0700725	0.117546	0.984012	0.0205793	0.970964	0.0205793	0.970964
OBFC1	0.943362	0.00736122	0.0989445	0.824036	0.0989445	0.824036	-0.108657	0.520542	-0.608968	0.147079	-0.608968	0.147079	-0.417676	0.972727	0.413868	0.448718	0.413868	0.448718
ODF2	-0.0332789	0.892184	-0.290659	0.442355	-0.290659	0.442355	-0.0044764	0.986883	-0.22316	0.513833	-0.22316	0.513833	-0.202047	0.972727	0.081012	0.868489	0.081012	0.868489
OGFRL1	1.71941	0.00519281	0.515348	0.165887	0.515348	0.165887	-0.313436	0.249673	-0.738115	0.225766	-0.738115	0.225766	-0.204749	0.972727	0.763918	0.202001	0.763918	0.202001
OGG1	-0.216306	0.416406	0.425104	0.310375	0.425104	0.310375	-0.118667	0.59401	0.464198	0.362125	0.464198	0.362125	0.344119	0.972727	-0.208055	0.69926	-0.208055	0.69926
OPA3	-0.168065	0.47867	0.156774	0.737347	0.156774	0.737347	0.0956883	0.67084	0.168486	0.674321	0.168486	0.674321	0.070255	0.992554	-0.249213	0.662705	-0.249213	0.662705
ORMDL2	1.14834	0.00751712	1.7661	0.00140378	1.7661	0.00140378	0.150549	0.59467	0.692731	0.132596	0.692731	0.132596	0.0277393	0.994516	-0.172306	0.732472	-0.172306	0.732472
OSBPL10	1.232	0.00501136	-0.373461	0.425143	-0.373461	0.425143	0.494681	0.0392294	-0.526876	0.160537	-0.526876	0.160537	-0.063002	0.992554	0.453906	0.453869	0.453906	0.453869
OSGEP	-0.311442	0.246501	-0.0117934	0.977044	-0.0117934	0.977044	-0.387333	0.184487	0.735369	0.166779	0.735369	0.166779	0.193496	0.972727	-0.249927	0.609543	-0.249927	0.609543
OSR2	2.77077	0.000530681	3.0189	2.73892e-05	3.0189	2.73892e-05	NA	NA	NA	NA	NA	NA	0.348923	0.972727	-0.0220504	0.964575	-0.0220504	0.964575
OSTF1	2.08537	0.00383998	0.756742	0.115543	0.756742	0.115543	0.19362	0.433557	0.362664	0.379079	0.362664	0.379079	-0.126719	0.992554	0.263264	0.658423	0.263264	0.658423
OTUB1	-0.764076	0.033228	-0.0148318	0.971793	-0.0148318	0.971793	0.203663	0.474233	0.217386	0.699846	0.217386	0.699846	0.314629	0.972727	-0.483622	0.358817	-0.483622	0.358817
PA2G4	-0.394053	0.115289	-0.456762	0.219261	-0.456762	0.219261	0.0427709	0.761791	-0.138652	0.72141	-0.138652	0.72141	0.0120318	0.99635	-0.086381	0.856	-0.086381	0.856
PABPN1	-1.07808	0.00748318	-0.874895	0.0329177	-0.874895	0.0329177	NA	NA	NA	NA	NA	NA	0.23381	0.972727	-0.0372254	0.938937	-0.0372254	0.938937
PACSIN2	0.38782	0.121308	0.145554	0.705377	0.145554	0.705377	-0.0846917	0.740276	-0.543756	0.12577	-0.543756	0.12577	-0.228668	0.972727	-0.114232	0.811533	-0.114232	0.811533
PACSIN3	1.24071	0.00569791	1.8625	0.000970277	1.8625	0.000970277	-0.085753	0.78658	0.633375	0.138045	0.633375	0.138045	-0.234365	0.972727	-1.04852	0.160823	-1.04852	0.160823
PAFAH1B3	-0.380067	0.199101	0.28845	0.463748	0.28845	0.463748	-0.119745	0.520935	1.14422	0.0236028	1.14422	0.0236028	0.256278	0.972727	-0.581383	0.29243	-0.581383	0.29243
PAFAH2	-0.298483	0.206179	-0.362587	0.33344	-0.362587	0.33344	-0.158714	0.618877	-0.987298	0.0256777	-0.987298	0.0256777	-0.059251	0.992554	0.193161	0.687087	0.193161	0.687087
PAIP2	0.130674	0.660801	-1.38046	0.00602365	-1.38046	0.00602365	0.0533191	0.800671	-0.147911	0.713769	-0.147911	0.713769	0.030785	0.994201	0.84784	0.199669	0.84784	0.199669
PAK6	0.334531	0.384577	0.650112	0.206693	0.650112	0.206693	-0.472537	0.0753037	0.478524	0.359063	0.478524	0.359063	0.0464092	0.992557	-0.648089	0.348833	-0.648089	0.348833
PARL	0.13389	0.602169	0.0746658	0.845313	0.0746658	0.845313	0.0357788	0.851888	-0.14699	0.645729	-0.14699	0.645729	-0.0646226	0.992554	-0.127933	0.783912	-0.127933	0.783912
PARP6	-0.12558	0.617361	-0.325288	0.366034	-0.325288	0.366034	0.241481	0.286288	-0.228215	0.514195	-0.228215	0.514195	0.0269324	0.993597	0.665756	0.227034	0.665756	0.227034
PAWR	0.223564	0.498254	-0.399458	0.29793	-0.399458	0.29793	0.672262	0.0990218	0.208494	0.810358	0.208494	0.810358	0.0129971	0.997152	0.246374	0.614154	0.246374	0.614154
PC	-0.698217	0.0346417	0.211036	0.571065	0.211036	0.571065	-0.252575	0.271652	0.61144	0.173262	0.61144	0.173262	0.221887	0.972727	-0.394895	0.412756	-0.394895	0.412756
PCBD1	-0.55725	0.0925293	-0.0867124	0.841446	-0.0867124	0.841446	0.00131636	0.995061	0.436546	0.456394	0.436546	0.456394	0.0112036	0.997152	-0.0610438	0.908571	-0.0610438	0.908571
PCBP1	-0.437053	0.0984415	-0.181283	0.61969	-0.181283	0.61969	0.141233	0.660834	-0.273867	0.578493	-0.273867	0.578493	0.060714	0.992554	-0.499696	0.315037	-0.499696	0.315037
PCBP4	-0.686291	0.0363902	0.368442	0.36861	0.368442	0.36861	0.0591609	0.764016	0.411723	0.466499	0.411723	0.466499	0.301363	0.972727	-0.568278	0.317702	-0.568278	0.317702
PCGF1	0.187835	0.477166	0.364362	0.321277	0.364362	0.321277	-0.0170672	0.951534	-0.142837	0.781529	-0.142837	0.781529	0.0947829	0.990269	-0.267168	0.568415	-0.267168	0.568415
PCMTD2	-0.0245499	0.954524	-1.24159	0.0129226	-1.24159	0.0129226	-0.0371811	0.843187	0.153663	0.727198	0.153663	0.727198	-0.184864	0.979452	0.741113	0.240509	0.741113	0.240509
PCNA	-0.505668	0.0551418	-1.35896	0.00773157	-1.35896	0.00773157	0.214584	0.346262	0.210865	0.648312	0.210865	0.648312	0.340483	0.972727	0.432087	0.423527	0.432087	0.423527
PCYT1A	0.849316	0.00933285	0.789649	0.0619419	0.789649	0.0619419	-0.186752	0.538943	-0.775643	0.155632	-0.775643	0.155632	-0.258125	0.972727	-0.116423	0.820236	-0.116423	0.820236
PCYT2	0.452554	0.106711	1.23395	0.0131279	1.23395	0.0131279	0.210221	0.497255	0.953863	0.0882564	0.953863	0.0882564	0.0164697	0.99545	-0.523753	0.355962	-0.523753	0.355962
PDCD2	-0.437197	0.0984415	-0.510196	0.18389	-0.510196	0.18389	0.17143	0.531519	0.714356	0.144062	0.714356	0.144062	0.150101	0.972727	0.147719	0.764226	0.147719	0.764226
PDLIM2	1.17277	0.00656418	2.55414	0.000171167	2.55414	0.000171167	-0.427974	0.127398	1.14448	0.103583	1.14448	0.103583	0.20923	0.972727	-0.424868	0.419712	-0.424868	0.419712
PDLIM4	4.91066	6.8045e-05	5.923	2.25138e-06	5.923	2.25138e-06	-0.810135	0.134838	0.371953	0.563334	0.371953	0.563334	-0.228905	0.972727	-1.35076	0.158354	-1.35076	0.158354
PDLIM7	0.181669	0.514974	0.995383	0.026496	0.995383	0.026496	-0.600772	0.123956	1.21572	0.0640298	1.21572	0.0640298	0.323207	0.972727	-0.406594	0.434771	-0.406594	0.434771
PDXP	-0.458262	0.11963	0.823665	0.0688381	0.823665	0.0688381	0.0541803	0.736178	0.501018	0.166919	0.501018	0.166919	0.288149	0.972727	-0.219417	0.688967	-0.219417	0.688967
PDZD11	0.157091	0.528523	0.418091	0.316427	0.418091	0.316427	0.07534	0.62841	0.379086	0.386094	0.379086	0.386094	0.134671	0.972727	-0.590694	0.309254	-0.590694	0.309254
PEA15	0.932316	0.00881697	1.56552	0.00318796	1.56552	0.00318796	0.0573229	0.720983	0.214732	0.561737	0.214732	0.561737	-0.0401485	0.992557	-0.16226	0.75658	-0.16226	0.75658
PELI3	-0.0706674	0.807915	0.585124	0.18199	0.585124	0.18199	0.0850296	0.718409	0.891175	0.0817509	0.891175	0.0817509	0.0408032	0.992557	-0.514961	0.371776	-0.514961	0.371776
PELO	0.302768	0.212008	0.618833	0.101416	0.618833	0.101416	0.0721994	0.725711	0.605827	0.138475	0.605827	0.138475	-0.18138	0.972727	-0.617894	0.250297	-0.617894	0.250297
PEMT	-0.147963	0.620398	0.835586	0.0623319	0.835586	0.0623319	-0.187108	0.296499	0.924082	0.150531	0.924082	0.150531	0.24034	0.972727	-0.363298	0.500836	-0.363298	0.500836
PER1	0.504838	0.0808073	1.17185	0.0109172	1.17185	0.0109172	0.444493	0.215452	0.787525	0.230323	0.787525	0.230323	-0.187587	0.972727	-0.760901	0.212124	-0.760901	0.212124
PEX19	-0.251251	0.28335	-0.032748	0.938606	-0.032748	0.938606	-0.227092	0.244418	-0.0216726	0.953269	-0.0216726	0.953269	-0.0143598	0.99545	-0.347228	0.489529	-0.347228	0.489529
PFDN2	0.154322	0.531566	-0.227882	0.540235	-0.227882	0.540235	-0.076778	0.783147	0.0646308	0.854623	0.0646308	0.854623	-0.0205098	0.994957	0.135438	0.777024	0.135438	0.777024
PFDN5	-0.301066	0.296078	0.163416	0.704091	0.163416	0.704091	-0.0722942	0.664936	0.311979	0.422109	0.311979	0.422109	0.169019	0.972727	-0.540264	0.339667	-0.540264	0.339667
PFN1	0.295557	0.336201	1.02178	0.0345758	1.02178	0.0345758	-0.228031	0.325238	0.557995	0.21585	0.557995	0.21585	0.238574	0.972727	-0.197445	0.728028	-0.197445	0.728028
PFN2	0.191701	0.465321	-0.157302	0.681634	-0.157302	0.681634	0.17967	0.378809	-0.200202	0.574604	-0.200202	0.574604	-0.0895789	0.991525	0.43731	0.377196	0.43731	0.377196
PGF	4.09717	0.000105936	5.2213	1.1412e-05	5.2213	1.1412e-05	NA	NA	NA	NA	NA	NA	-0.192041	0.972727	-0.70062	0.353077	-0.70062	0.353077
PGLS	-0.446849	0.134535	0.538252	0.214972	0.538252	0.214972	-0.00300845	0.982493	1.16825	0.039322	1.16825	0.039322	0.203543	0.972727	-0.799523	0.225709	-0.799523	0.225709
PGM3	0.458993	0.328607	-0.744496	0.180583	-0.744496	0.180583	-0.0462029	0.828401	0.507761	0.378476	0.507761	0.378476	-0.382234	0.972727	0.644305	0.376849	0.644305	0.376849
PHB	-0.336291	0.255443	0.243094	0.524985	0.243094	0.524985	-0.00867524	0.972756	0.600758	0.109357	0.600758	0.109357	0.247355	0.972727	-0.657994	0.243605	-0.657994	0.243605
PHB2	-0.437881	0.126307	0.388851	0.327282	0.388851	0.327282	-0.024017	0.887771	0.153333	0.747242	0.153333	0.747242	0.270095	0.972727	-0.663436	0.254695	-0.663436	0.254695
PHC2	-0.88385	0.0182356	-0.140084	0.765635	-0.140084	0.765635	0.00986933	0.969751	0.754881	0.0823481	0.754881	0.0823481	0.363621	0.972727	0.0118444	0.985953	0.0118444	0.985953
PHF19	0.0871519	0.744648	0.709439	0.0892608	0.709439	0.0892608	NA	NA	NA	NA	NA	NA	0.180683	0.972727	-0.223886	0.661328	-0.223886	0.661328
PHF5A	-0.687282	0.0350754	-0.207287	0.630441	-0.207287	0.630441	-0.371422	0.169733	0.321164	0.458428	0.321164	0.458428	0.360233	0.972727	-0.319672	0.553166	-0.319672	0.553166
PHLDA1	1.40602	0.00196012	1.44307	0.00353952	1.44307	0.00353952	0.105023	0.639158	0.390568	0.317551	0.390568	0.317551	-0.166218	0.972727	-0.0943879	0.846163	-0.0943879	0.846163
PHPT1	-0.128153	0.698255	0.557077	0.203319	0.557077	0.203319	-0.123933	0.607111	0.847172	0.0401695	0.847172	0.0401695	0.307794	0.972727	0.048003	0.932035	0.048003	0.932035
PIN1	-0.0449962	0.892385	0.777288	0.0965969	0.777288	0.0965969	0.0551883	0.853933	0.91001	0.104473	0.91001	0.104473	0.393535	0.972727	-0.092443	0.874687	-0.092443	0.874687
PINK1	0.43815	0.127585	1.06877	0.0181148	1.06877	0.0181148	0.221958	0.618825	-0.617038	0.304641	-0.617038	0.304641	0.0119093	0.997152	-0.697007	0.23611	-0.697007	0.23611
PINX1	-0.116864	0.658353	-0.183039	0.617929	-0.183039	0.617929	0.470937	0.0320099	0.0978562	0.765652	0.0978562	0.765652	0.0554885	0.992554	-0.117655	0.80053	-0.117655	0.80053
PKIG	-0.203328	0.420332	0.665369	0.127298	0.665369	0.127298	-0.0440857	0.81604	0.224083	0.579197	0.224083	0.579197	-0.116232	0.979877	-0.0721421	0.896662	-0.0721421	0.896662
PLAT	3.80482	9.18844e-05	3.56935	2.36356e-05	3.56935	2.36356e-05	-0.320238	0.282836	0.184079	0.720899	0.184079	0.720899	-0.260557	0.972727	-0.430484	0.434507	-0.430484	0.434507
PLEKHF1	0.0284717	0.929208	0.755837	0.0606554	0.755837	0.0606554	NA	NA	NA	NA	NA	NA	-0.333099	0.972727	-1.01631	0.162296	-1.01631	0.162296
PMF1	-1.05201	0.0151149	-0.366934	0.363236	-0.366934	0.363236	-0.122779	0.57172	0.58628	0.132917	0.58628	0.132917	0.364441	0.972727	-0.480756	0.371776	-0.480756	0.371776
PMM2	0.1065	0.691542	0.186022	0.618875	0.186022	0.618875	-0.198582	0.373067	-0.125331	0.70851	-0.125331	0.70851	0.0528061	0.992557	-0.131258	0.782973	-0.131258	0.782973
PNKP	0.342421	0.214004	1.25915	0.00671396	1.25915	0.00671396	-0.131684	0.59824	0.915566	0.0433299	0.915566	0.0433299	-0.0192329	0.99545	-0.879884	0.180861	-0.879884	0.180861
PNPLA4	1.45307	0.00192003	1.32567	0.010916	1.32567	0.010916	0.0988443	0.703531	1.13958	0.112338	1.13958	0.112338	-0.321318	0.972727	0.320374	0.561518	0.320374	0.561518
POLD1	-0.793956	0.0294457	0.0814562	0.834395	0.0814562	0.834395	NA	NA	NA	NA	NA	NA	0.387534	0.972727	-0.383145	0.423824	-0.383145	0.423824
POLD2	-0.737247	0.0269324	0.293324	0.483245	0.293324	0.483245	-0.0332344	0.892899	0.521362	0.202046	0.521362	0.202046	0.291547	0.972727	-0.380907	0.477701	-0.380907	0.477701
POLD4	1.92071	0.00090545	2.60968	0.000154862	2.60968	0.000154862	-0.179024	0.380042	1.14605	0.0305761	1.14605	0.0305761	-0.124344	0.977964	-0.695211	0.24709	-0.695211	0.24709
POLDIP2	-0.204466	0.436306	0.39093	0.346804	0.39093	0.346804	0.41398	0.217792	0.375603	0.47389	0.375603	0.47389	0.248289	0.972727	-0.236191	0.656629	-0.236191	0.656629
POLE3	-0.769446	0.0153475	-1.44386	0.00268683	-1.44386	0.00268683	0.0333436	0.848475	-0.165392	0.667033	-0.165392	0.667033	0.288977	0.972727	1.15901	0.134655	1.15901	0.134655
POLE4	-0.669202	0.0715154	0.512354	0.26675	0.512354	0.26675	0.634706	0.230662	0.618937	0.345355	0.618937	0.345355	0.469123	0.972727	-0.113493	0.848248	-0.113493	0.848248
POLR1C	-0.580441	0.0589833	0.0684978	0.860714	0.0684978	0.860714	-0.0707646	0.759216	0.229492	0.604506	0.229492	0.604506	0.0304219	0.992767	-0.496721	0.324189	-0.496721	0.324189
POLR2D	-0.199564	0.46462	-0.345855	0.339924	-0.345855	0.339924	-0.0637848	0.745138	-0.4118	0.332922	-0.4118	0.332922	-0.0228468	0.994957	0.66072	0.229712	0.66072	0.229712
POLR2F	-0.626394	0.113325	0.361284	0.377613	0.361284	0.377613	-0.239968	0.497411	0.436586	0.254157	0.436586	0.254157	0.333945	0.972727	-0.0890539	0.866945	-0.0890539	0.866945
POLR2H	-0.182189	0.54855	0.526675	0.200257	0.526675	0.200257	0.13056	0.382863	0.853258	0.09191	0.853258	0.09191	0.212052	0.972727	-0.421693	0.426964	-0.421693	0.426964
POLR2I	-0.423935	0.201929	0.605982	0.18575	0.605982	0.18575	-0.0142042	0.954389	0.846607	0.0365282	0.846607	0.0365282	0.247554	0.972727	-0.283573	0.623016	-0.283573	0.623016
POLR2J	-0.251994	0.436306	0.325348	0.438756	0.325348	0.438756	0.108884	0.742355	0.82367	0.043285	0.82367	0.043285	0.332497	0.972727	0.0715467	0.896136	0.0715467	0.896136
POLR2K	-0.446504	0.140691	-0.898688	0.0261577	-0.898688	0.0261577	-0.0195144	0.910908	0.0615368	0.89556	0.0615368	0.89556	-0.00298068	0.999144	0.92849	0.16771	0.92849	0.16771
POLR2L	-0.079554	0.842936	0.752115	0.089147	0.752115	0.089147	-0.24013	0.462186	0.771008	0.0591489	0.771008	0.0591489	0.355097	0.972727	0.061029	0.911704	0.061029	0.911704
POLR3D	-0.290469	0.213983	0.34474	0.34132	0.34474	0.34132	-0.0345951	0.913168	-0.162477	0.673435	-0.162477	0.673435	0.0800818	0.990269	-0.501999	0.317702	-0.501999	0.317702
POLR3E	-0.445957	0.0813255	-0.553237	0.149064	-0.553237	0.149064	-0.0274063	0.921457	-0.0975627	0.831082	-0.0975627	0.831082	0.0575574	0.992554	-0.132102	0.786723	-0.132102	0.786723
POLR3K	-0.1232	0.727567	0.511967	0.217494	0.511967	0.217494	-0.223596	0.419844	0.699431	0.124831	0.699431	0.124831	0.351236	0.972727	0.161308	0.7633	0.161308	0.7633
POMZP3	-0.260844	0.375898	0.616068	0.138807	0.616068	0.138807	NA	NA	NA	NA	NA	NA	0.0759622	0.992554	-0.108167	0.836497	-0.108167	0.836497
POP4	-0.467164	0.0948423	-0.345531	0.346299	-0.345531	0.346299	0.129475	0.468904	0.299801	0.469895	0.299801	0.469895	0.0639162	0.992554	-0.132802	0.781319	-0.132802	0.781319
POP5	-0.117518	0.684829	0.34048	0.41256	0.34048	0.41256	0.0794242	0.716175	0.242312	0.576144	0.242312	0.576144	0.131241	0.977512	0.113279	0.832056	0.113279	0.832056
POP7	-0.447983	0.195172	0.355079	0.423532	0.355079	0.423532	0.108129	0.565275	0.983647	0.0419979	0.983647	0.0419979	0.31916	0.972727	-0.129961	0.820047	-0.129961	0.820047
PPARD	-0.0279281	0.918762	0.172844	0.700151	0.172844	0.700151	-0.445804	0.189767	-0.107277	0.765526	-0.107277	0.765526	0.0577188	0.992554	-0.144036	0.797889	-0.144036	0.797889
PPCDC	-0.289028	0.299137	0.644521	0.149914	0.644521	0.149914	0.0405863	0.899963	0.463796	0.429771	0.463796	0.429771	0.282811	0.972727	-0.361062	0.519912	-0.361062	0.519912
PPCS	0.781127	0.014007	0.413592	0.265826	0.413592	0.265826	-0.0161064	0.913986	-0.0505717	0.897753	-0.0505717	0.897753	-0.0916856	0.984251	-0.205627	0.66471	-0.205627	0.66471
PPIE	-0.0509406	0.843009	0.556007	0.152025	0.556007	0.152025	0.0173568	0.915885	0.414667	0.325763	0.414667	0.325763	0.145454	0.972727	-0.869618	0.186025	-0.869618	0.186025
PPIH	-0.623747	0.059678	-0.246182	0.535953	-0.246182	0.535953	0.0501686	0.748004	0.626746	0.177846	0.626746	0.177846	0.212144	0.972727	-0.545662	0.317795	-0.545662	0.317795
PPM1F	0.5666	0.0683046	1.27506	0.00978014	1.27506	0.00978014	-0.194197	0.397889	0.198746	0.614022	0.198746	0.614022	-0.0926854	0.991525	-0.77143	0.221113	-0.77143	0.221113
PPM1G	-1.14933	0.00385623	-0.797416	0.0426905	-0.797416	0.0426905	0.0493141	0.743389	-0.207903	0.542676	-0.207903	0.542676	-0.0126387	0.996206	-0.416416	0.384277	-0.416416	0.384277
PPP1CA	-0.480065	0.113656	0.290827	0.492476	0.290827	0.492476	0.0241101	0.886049	0.813419	0.121297	0.813419	0.121297	0.33696	0.972727	-0.409775	0.4526	-0.409775	0.4526
PPP1R11	-0.572621	0.044644	-0.395432	0.317337	-0.395432	0.317337	NA	NA	NA	NA	NA	NA	0.21853	0.972727	-0.0971688	0.848568	-0.0971688	0.848568
PPP1R12C	0.142616	0.596253	0.870998	0.0454584	0.870998	0.0454584	0.0369973	0.917636	0.782874	0.107623	0.782874	0.107623	0.136355	0.972727	-0.360311	0.486164	-0.360311	0.486164
PPP1R16A	-0.433358	0.129988	0.565681	0.173161	0.565681	0.173161	-0.36728	0.145123	0.844237	0.056033	0.844237	0.056033	0.203029	0.972727	-0.30765	0.555379	-0.30765	0.555379
PPP1R7	-0.0186019	0.946426	-0.222706	0.540345	-0.222706	0.540345	-0.0782328	0.683911	0.236502	0.500226	0.236502	0.500226	-0.0674932	0.992554	-0.187923	0.683725	-0.187923	0.683725
PPP2R1A	-0.668163	0.0337936	0.115488	0.765701	0.115488	0.765701	0.112367	0.604302	0.419658	0.407294	0.419658	0.407294	0.254084	0.972727	-0.622567	0.250652	-0.622567	0.250652
PPP2R2B	0.700338	0.0223894	-0.34583	0.449279	-0.34583	0.449279	0.0466661	0.794786	-0.176716	0.662021	-0.176716	0.662021	-0.357133	0.972727	0.667119	0.297046	0.667119	0.297046
PPP4C	-0.261636	0.378331	0.271851	0.515922	0.271851	0.515922	0.174172	0.571216	1.12437	0.0671072	1.12437	0.0671072	0.192501	0.972727	-0.212002	0.690214	-0.212002	0.690214
PPT2	0.453685	0.144807	1.33517	0.00661851	1.33517	0.00661851	NA	NA	NA	NA	NA	NA	0.47598	0.972727	-0.296609	0.555379	-0.296609	0.555379
PQBP1	-0.890363	0.0268877	0.0105205	0.978864	0.0105205	0.978864	-0.0999475	0.711501	0.509723	0.233978	0.509723	0.233978	0.455872	0.972727	-0.4212	0.389518	-0.4212	0.389518
PRAF2	0.247393	0.307408	0.959925	0.0431861	0.959925	0.0431861	0.21282	0.423478	0.740887	0.205435	0.740887	0.205435	0.0775072	0.992554	-0.438728	0.439837	-0.438728	0.439837
PRCC	-0.331802	0.198582	-0.308728	0.415309	-0.308728	0.415309	0.142773	0.383314	0.501242	0.221325	0.501242	0.221325	0.138266	0.972727	-0.113132	0.817161	-0.113132	0.817161
PRDX1	-0.0762717	0.784821	0.254225	0.526546	0.254225	0.526546	-0.0747815	0.709436	0.418369	0.349192	0.418369	0.349192	-0.0457434	0.992557	-0.416321	0.42312	-0.416321	0.42312
PRDX5	0.311587	0.277824	1.24974	0.0131537	1.24974	0.0131537	0.0189355	0.921808	0.791276	0.035101	0.791276	0.035101	0.113524	0.984251	-0.749392	0.240495	-0.749392	0.240495
PREB	-0.652848	0.0339732	0.0113043	0.981136	0.0113043	0.981136	0.309414	0.431008	1.22736	0.0958067	1.22736	0.0958067	0.0271664	0.994038	-0.449838	0.436901	-0.449838	0.436901
PRKAB1	-0.34976	0.176087	0.0881479	0.81658	0.0881479	0.81658	-0.0723394	0.790084	0.175987	0.674172	0.175987	0.674172	0.132304	0.972727	-0.170729	0.71269	-0.170729	0.71269
PRKAG1	-0.083794	0.746557	0.370042	0.334224	0.370042	0.334224	0.0276425	0.896271	0.157243	0.681795	0.157243	0.681795	0.112096	0.979877	-0.463128	0.366761	-0.463128	0.366761
PRKX	-0.871248	0.025092	-1.89315	0.000803488	-1.89315	0.000803488	NA	NA	NA	NA	NA	NA	-0.082011	0.992554	0.842467	0.19183	0.842467	0.19183
PRMT1	-0.601402	0.0822972	0.225243	0.540345	0.225243	0.540345	0.0698237	0.746923	0.638329	0.195633	0.638329	0.195633	0.270963	0.972727	-0.649309	0.235711	-0.649309	0.235711
PRMT2	0.353073	0.161552	0.926156	0.0407842	0.926156	0.0407842	0.117443	0.622635	0.129846	0.722246	0.129846	0.722246	0.0101088	0.997152	-0.177121	0.741768	-0.177121	0.741768
PRMT8	-0.477459	0.0699661	-0.275504	0.447491	-0.275504	0.447491	0.323071	0.0983778	0.366664	0.333059	0.366664	0.333059	0.0652832	0.992554	-0.168189	0.718406	-0.168189	0.718406
PRPS1	-1.25654	0.00200656	-1.50264	0.00592798	-1.50264	0.00592798	0.291401	0.217233	0.0705749	0.859366	0.0705749	0.859366	-0.183144	0.972727	-0.0661624	0.906519	-0.0661624	0.906519
PRPSAP2	-0.195376	0.435306	-0.914536	0.0629774	-0.914536	0.0629774	0.0366892	0.820156	-0.399961	0.315694	-0.399961	0.315694	-0.0223617	0.99482	0.445249	0.45752	0.445249	0.45752
PRR13	0.692034	0.0259548	0.98808	0.0261024	0.98808	0.0261024	-0.051565	0.728868	0.348919	0.350874	0.348919	0.350874	-0.101068	0.984012	-0.448088	0.390952	-0.448088	0.390952
PRSS12	1.10309	0.0287666	0.521558	0.23988	0.521558	0.23988	-0.0660129	0.856467	-0.171247	0.794672	-0.171247	0.794672	-0.382048	0.972727	0.154884	0.787162	0.154884	0.787162
PSMB2	-0.405331	0.123851	-0.30777	0.399334	-0.30777	0.399334	0.197291	0.240852	0.699521	0.152013	0.699521	0.152013	0.134138	0.972727	-0.272476	0.557607	-0.272476	0.557607
PSMB3	-0.256761	0.326034	0.578116	0.126268	0.578116	0.126268	NA	NA	NA	NA	NA	NA	0.297561	0.972727	-0.795607	0.196975	-0.795607	0.196975
PSMB5	-0.298689	0.338329	0.499974	0.19074	0.499974	0.19074	0.221316	0.263039	0.838066	0.0781918	0.838066	0.0781918	0.235546	0.972727	-0.725866	0.217363	-0.725866	0.217363
PSMB6	-0.33458	0.253746	0.403963	0.327651	0.403963	0.327651	0.00722118	0.971546	0.54368	0.164919	0.54368	0.164919	0.202133	0.972727	-0.543288	0.335526	-0.543288	0.335526
PSMB7	-0.561272	0.0733846	0.102252	0.791589	0.102252	0.791589	-0.060037	0.75113	0.555108	0.32881	0.555108	0.32881	0.0728292	0.992554	-0.766216	0.201999	-0.766216	0.201999
PSMC3	-0.633448	0.046969	0.101491	0.793995	0.101491	0.793995	0.105348	0.650092	0.226556	0.50223	0.226556	0.50223	0.256233	0.972727	-0.526973	0.305498	-0.526973	0.305498
PSMC4	-0.346633	0.180196	0.297186	0.408022	0.297186	0.408022	0.219721	0.347122	0.197184	0.581158	0.197184	0.581158	0.249373	0.972727	-0.41184	0.385246	-0.41184	0.385246
PSMC5	-0.393812	0.190577	-0.340717	0.351611	-0.340717	0.351611	0.143068	0.384405	0.507386	0.173762	0.507386	0.173762	0.13655	0.977964	-0.175732	0.709065	-0.175732	0.709065
PSMD13	-0.108853	0.680456	0.586074	0.11555	0.586074	0.11555	0.0301948	0.863504	0.562282	0.136349	0.562282	0.136349	0.133551	0.972727	-0.553915	0.281017	-0.553915	0.281017
PSMD2	-0.254427	0.286435	0.31021	0.401914	0.31021	0.401914	0.298416	0.290719	0.107317	0.740998	0.107317	0.740998	0.000275796	0.999603	-0.323089	0.495365	-0.323089	0.495365
PSMD3	-0.318334	0.223701	0.274735	0.457419	0.274735	0.457419	0.335571	0.412823	0.777699	0.154658	0.777699	0.154658	0.170477	0.972727	-0.470529	0.346612	-0.470529	0.346612
PSME3	-0.248478	0.290376	-0.200406	0.58516	-0.200406	0.58516	0.192856	0.339596	-0.37927	0.310924	-0.37927	0.310924	0.136293	0.972727	-0.142571	0.762428	-0.142571	0.762428
PSMF1	-0.349365	0.1543	0.0326097	0.936927	0.0326097	0.936927	0.170578	0.310663	0.64107	0.162651	0.64107	0.162651	0.123035	0.972727	-0.339789	0.483995	-0.339789	0.483995
PTGES2	-0.124009	0.678936	0.783555	0.0688381	0.783555	0.0688381	0.135119	0.792172	0.867238	0.151925	0.867238	0.151925	0.196094	0.972727	-0.618007	0.284216	-0.618007	0.284216
PTGES3	-0.0133746	0.957773	-1.03966	0.0225701	-1.03966	0.0225701	0.132989	0.501156	0.139525	0.669852	0.139525	0.669852	-0.038984	0.992557	0.285366	0.576889	0.285366	0.576889
PTOV1	-0.617001	0.0432571	0.0935503	0.81165	0.0935503	0.81165	-0.00331573	0.990224	0.773146	0.0283434	0.773146	0.0283434	0.273496	0.972727	-0.633836	0.248788	-0.633836	0.248788
PTRF	3.81544	0.000136429	4.44295	2.87922e-06	4.44295	2.87922e-06	-0.760989	0.0440416	-0.0702861	0.92882	-0.0702861	0.92882	-0.443864	0.972727	-1.01088	0.161872	-1.01088	0.161872
PTRH1	0.273278	0.306118	1.52089	0.00621406	1.52089	0.00621406	0.572597	0.220355	1.02256	0.0820964	1.02256	0.0820964	-6.09153e-05	0.999939	-0.994141	0.189275	-0.994141	0.189275
PUSL1	0.100798	0.725923	1.13603	0.018238	1.13603	0.018238	-0.179557	0.548919	0.948204	0.0824789	0.948204	0.0824789	0.182853	0.972727	-0.730269	0.241426	-0.730269	0.241426
QDPR	-0.216697	0.414034	0.0228535	0.956583	0.0228535	0.956583	0.688869	0.0950825	0.618712	0.303356	0.618712	0.303356	-0.00366085	0.99872	-0.111025	0.827465	-0.111025	0.827465
RAB1B	-0.545301	0.0704892	0.177651	0.6966	0.177651	0.6966	-0.064808	0.776313	0.337377	0.54318	0.337377	0.54318	0.251983	0.972727	-0.325294	0.561912	-0.325294	0.561912
RAB32	4.16017	7.80963e-05	4.85848	9.48651e-06	4.85848	9.48651e-06	NA	NA	NA	NA	NA	NA	0.0463715	0.992557	-0.221793	0.731756	-0.221793	0.731756
RAB34	0.691022	0.0359625	1.48904	0.0046974	1.48904	0.0046974	-0.699638	0.0417521	0.0873062	0.867638	0.0873062	0.867638	0.282228	0.972727	-0.438587	0.414079	-0.438587	0.414079
RAB4A	-0.262274	0.247187	-0.605551	0.110026	-0.605551	0.110026	0.357682	0.272729	-0.353289	0.310487	-0.353289	0.310487	0.141561	0.972727	0.464606	0.349331	0.464606	0.349331
RAB5B	0.21666	0.361797	0.116217	0.772551	0.116217	0.772551	0.263937	0.135177	-0.248544	0.483414	-0.248544	0.483414	-0.120768	0.973677	0.000200119	0.999618	0.000200119	0.999618
RAB5C	0.120169	0.6433	0.73804	0.0711604	0.73804	0.0711604	-0.232157	0.309206	0.533961	0.314857	0.533961	0.314857	0.114418	0.979877	-0.606548	0.275277	-0.606548	0.275277
RABAC1	0.707031	0.0398059	1.59359	0.00328551	1.59359	0.00328551	0.0339379	0.875703	1.14938	0.0151438	1.14938	0.0151438	0.123956	0.980998	-0.802787	0.213606	-0.802787	0.213606
RABEPK	-0.415652	0.12749	0.089947	0.838673	0.089947	0.838673	0.0322366	0.879674	0.141809	0.749213	0.141809	0.749213	0.232419	0.972727	-0.248801	0.64018	-0.248801	0.64018
RAD23A	0.296932	0.213605	0.312331	0.449341	0.312331	0.449341	-0.0459468	0.889651	0.392365	0.25103	0.392365	0.25103	-0.250712	0.972727	-0.166314	0.757058	-0.166314	0.757058
RALY	-0.657997	0.0398593	0.0715125	0.860714	0.0715125	0.860714	0.156648	0.803864	0.755401	0.258966	0.755401	0.258966	0.283335	0.972727	-0.506369	0.332228	-0.506369	0.332228
RANBP1	-0.520132	0.0959532	-0.520283	0.18093	-0.520283	0.18093	-0.00633282	0.971333	0.272816	0.469808	0.272816	0.469808	0.140891	0.974689	-0.0242223	0.962605	-0.0242223	0.962605
RAP1A	0.759455	0.0482436	-0.438053	0.263293	-0.438053	0.263293	0.344024	0.255767	-0.489893	0.194314	-0.489893	0.194314	-0.297453	0.972727	0.583705	0.290501	0.583705	0.290501
RAVER1	-0.703733	0.0275116	-0.212437	0.571295	-0.212437	0.571295	-0.242965	0.409084	0.0598258	0.897484	0.0598258	0.897484	0.273651	0.972727	-0.330024	0.488889	-0.330024	0.488889
RBBP4	-0.331465	0.189108	-1.43961	0.00882446	-1.43961	0.00882446	0.095014	0.560729	-0.247498	0.502558	-0.247498	0.502558	-0.083401	0.991525	0.512324	0.389463	0.512324	0.389463
RBM10	-0.680667	0.0289082	-0.308673	0.407783	-0.308673	0.407783	-0.0230701	0.905642	0.13146	0.722165	0.13146	0.722165	0.121379	0.974689	-0.24723	0.602286	-0.24723	0.602286
RBM15B	-0.765353	0.0283782	-0.411747	0.308362	-0.411747	0.308362	-0.193986	0.455615	0.348577	0.420632	0.348577	0.420632	0.135499	0.974689	-0.1332	0.799158	-0.1332	0.799158
RBM3	-0.377356	0.19063	-0.85394	0.0420455	-0.85394	0.0420455	-0.361428	0.198791	-0.0944402	0.807696	-0.0944402	0.807696	0.157807	0.972727	0.000210841	0.999618	0.000210841	0.999618
RBM8A	-0.317483	0.265991	-1.09834	0.0167161	-1.09834	0.0167161	-0.121368	0.538029	-0.241047	0.520982	-0.241047	0.520982	0.0289645	0.994406	0.503391	0.34841	0.503391	0.34841
RBPMS	1.24827	0.00210628	1.89812	0.000899212	1.89812	0.000899212	-1.02566	0.0793033	0.139783	0.854238	0.139783	0.854238	-0.165774	0.972727	-0.679429	0.241163	-0.679429	0.241163
RBX1	-0.159307	0.614978	0.106032	0.788495	0.106032	0.788495	0.0104664	0.953749	0.262773	0.512683	0.262773	0.512683	0.268441	0.972727	0.329532	0.492675	0.329532	0.492675
RER1	0.437264	0.116078	1.0037	0.0247419	1.0037	0.0247419	0.178863	0.383213	0.546118	0.274294	0.546118	0.274294	0.0875213	0.991525	-0.271266	0.592451	-0.271266	0.592451
REXO4	-0.398132	0.169837	-0.367506	0.330772	-0.367506	0.330772	0.0266668	0.915284	0.514303	0.203509	0.514303	0.203509	0.100628	0.990269	0.047643	0.92265	0.047643	0.92265
RFC2	-0.627219	0.0663384	-0.226969	0.548985	-0.226969	0.548985	0.0533374	0.820893	0.613381	0.204285	0.613381	0.204285	0.247125	0.972727	-0.207764	0.665022	-0.207764	0.665022
RFXANK	-0.22619	0.37225	0.427124	0.291337	0.427124	0.291337	-0.152059	0.516274	0.427716	0.30434	0.427716	0.30434	0.216381	0.972727	-0.454934	0.393799	-0.454934	0.393799
RGS19	0.440505	0.193246	0.691223	0.103646	0.691223	0.103646	0.0390047	0.921893	1.6037	0.0359996	1.6037	0.0359996	0.0384849	0.992767	-0.213468	0.683725	-0.213468	0.683725
RGS3	1.18328	0.00422861	1.93246	0.00138709	1.93246	0.00138709	0.0443841	0.883998	0.910545	0.101463	0.910545	0.101463	-0.0994381	0.984416	-0.662883	0.276866	-0.662883	0.276866
RHBDF2	3.27774	0.000128736	3.64707	2.43258e-05	3.64707	2.43258e-05	NA	NA	NA	NA	NA	NA	-0.49059	0.972727	-1.14782	0.163944	-1.14782	0.163944
RHEB	0.0741742	0.752238	-0.717798	0.0655928	-0.717798	0.0655928	0.175254	0.429451	0.494003	0.272758	0.494003	0.272758	-0.130377	0.972727	0.593353	0.265493	0.593353	0.265493
RHOA	0.0329154	0.893632	0.063321	0.874266	0.063321	0.874266	-0.085866	0.615508	-0.0798794	0.833513	-0.0798794	0.833513	-0.0432773	0.992557	-0.194155	0.685288	-0.194155	0.685288
RHOC	0.792768	0.0171373	1.81801	0.00202094	1.81801	0.00202094	-0.632342	0.086201	0.393394	0.352392	0.393394	0.352392	-0.0153727	0.99545	-0.845939	0.212386	-0.845939	0.212386
RHOF	1.1948	0.00557212	1.54757	0.00262877	1.54757	0.00262877	NA	NA	NA	NA	NA	NA	-0.0366971	0.992557	-0.286807	0.556379	-0.286807	0.556379
RHOG	0.286903	0.285553	0.884177	0.0471032	0.884177	0.0471032	0.165073	0.553466	0.68878	0.276301	0.68878	0.276301	0.180707	0.972727	-0.167822	0.754852	-0.167822	0.754852
RIC8A	0.0708126	0.784525	0.648921	0.113032	0.648921	0.113032	-0.0455189	0.793207	0.378565	0.573602	0.378565	0.573602	0.12513	0.972727	-0.695529	0.240712	-0.695529	0.240712
RING1	-0.59172	0.1246	0.0686669	0.861748	0.0686669	0.861748	NA	NA	NA	NA	NA	NA	0.190693	0.972727	-0.438112	0.372978	-0.438112	0.372978
RIT1	1.65779	0.000948713	0.917894	0.0573729	0.917894	0.0573729	-0.231664	0.463455	-0.448646	0.265954	-0.448646	0.265954	-0.338097	0.972727	-0.228665	0.693651	-0.228665	0.693651
RMND5B	-0.163521	0.528837	0.454771	0.258306	0.454771	0.258306	-0.0521769	0.751131	0.481194	0.304979	0.481194	0.304979	0.0622565	0.992554	-0.146187	0.779214	-0.146187	0.779214
RNASEH1	0.361974	0.151731	-0.537342	0.150435	-0.537342	0.150435	0.142081	0.371775	0.406963	0.381461	0.406963	0.381461	-0.112713	0.977929	0.966352	0.163944	0.966352	0.163944
RNASEH2A	-0.551829	0.0659115	0.248155	0.509601	0.248155	0.509601	0.14192	0.622527	0.454212	0.25436	0.454212	0.25436	0.194773	0.972727	-0.686649	0.22799	-0.686649	0.22799
RNF10	0.33235	0.153607	0.306985	0.396553	0.306985	0.396553	0.349224	0.108866	-0.173661	0.608307	-0.173661	0.608307	-0.122229	0.972727	0.336883	0.470711	0.336883	0.470711
RNF113A	-0.154726	0.499944	0.233855	0.528551	0.233855	0.528551	-0.0804369	0.766165	0.0382245	0.91387	0.0382245	0.91387	-0.0889457	0.985621	-0.644046	0.241426	-0.644046	0.241426
RNF14	1.03032	0.012872	-0.0010542	0.998534	-0.0010542	0.998534	0.067241	0.785192	-0.100035	0.775881	-0.100035	0.775881	-0.362545	0.972727	0.462996	0.421984	0.462996	0.421984
RNF34	-0.263437	0.342104	-0.88582	0.0617449	-0.88582	0.0617449	0.137971	0.525316	0.22	0.494382	0.22	0.494382	0.120601	0.980068	0.644542	0.301088	0.644542	0.301088
RNF41	0.0592373	0.811057	0.44168	0.264812	0.44168	0.264812	0.14088	0.442434	0.0867106	0.802842	0.0867106	0.802842	0.0106299	0.99683	0.0246738	0.963099	0.0246738	0.963099
RNF44	-0.825899	0.0169928	-1.15698	0.00910045	-1.15698	0.00910045	-0.128654	0.645447	0.398615	0.430344	0.398615	0.430344	0.26382	0.972727	0.600334	0.259257	0.600334	0.259257
RNF5	-0.164085	0.563001	0.307468	0.50012	0.307468	0.50012	NA	NA	NA	NA	NA	NA	0.2191	0.972727	-0.15534	0.791793	-0.15534	0.791793
RNF7	0.0769089	0.81162	0.72243	0.068437	0.72243	0.068437	-0.0291888	0.85594	0.701876	0.213026	0.701876	0.213026	0.10028	0.992179	-0.153396	0.753663	-0.153396	0.753663
RNPS1	-0.611811	0.0459434	-0.317731	0.39673	-0.317731	0.39673	0.0216271	0.91929	0.270507	0.470816	0.270507	0.470816	0.159642	0.972727	-0.308945	0.51875	-0.308945	0.51875
ROBO3	-0.0967585	0.783865	0.426001	0.283278	0.426001	0.283278	-0.352182	0.298354	1.52467	0.01673	1.52467	0.01673	0.390856	0.972727	-0.1806	0.724816	-0.1806	0.724816
RPL26L1	0.0420163	0.889944	-0.296313	0.449777	-0.296313	0.449777	-0.203232	0.462551	0.0129068	0.972103	0.0129068	0.972103	-0.0655841	0.992554	-0.216898	0.66471	-0.216898	0.66471
RPL36	-0.325205	0.304635	0.704668	0.122999	0.704668	0.122999	0.0391886	0.823161	0.772664	0.0582571	0.772664	0.0582571	0.209498	0.972727	-0.56495	0.348345	-0.56495	0.348345
RPL36A	-0.285781	0.497283	-0.940206	0.0481157	-0.940206	0.0481157	0.109277	0.775604	0.452442	0.310615	0.452442	0.310615	0.309383	0.972727	1.81356	0.11458	1.81356	0.11458
RPL8	-0.562484	0.0836482	0.62104	0.117077	0.62104	0.117077	0.00114429	0.994602	0.699124	0.069094	0.699124	0.069094	0.312997	0.972727	-1.02185	0.163944	-1.02185	0.163944
RPLP1	-0.42127	0.237558	0.439832	0.316623	0.439832	0.316623	-0.112975	0.620931	0.629852	0.147866	0.629852	0.147866	0.285919	0.972727	-0.293378	0.600494	-0.293378	0.600494
RPP14	0.0600827	0.808981	-0.520058	0.190972	-0.520058	0.190972	0.04185	0.826993	-0.195313	0.554877	-0.195313	0.554877	-0.103767	0.980068	0.39089	0.44393	0.39089	0.44393
RPS11	-0.842089	0.0416705	0.252886	0.541299	0.252886	0.541299	-0.168919	0.513262	0.560766	0.139653	0.560766	0.139653	0.225122	0.972727	-0.790634	0.217263	-0.790634	0.217263
RPS19BP1	-0.152337	0.662242	0.859807	0.0573047	0.859807	0.0573047	-0.0171541	0.919814	0.710601	0.114657	0.710601	0.114657	0.369187	0.972727	-0.203602	0.708518	-0.203602	0.708518
RPS5	-0.511863	0.128408	0.663126	0.0961238	0.663126	0.0961238	0.103145	0.718375	0.530351	0.216782	0.530351	0.216782	0.377367	0.972727	-0.951761	0.172054	-0.951761	0.172054
RPS6KA1	0.11297	0.709362	0.854399	0.0404641	0.854399	0.0404641	NA	NA	NA	NA	NA	NA	-0.078489	0.992554	-0.728453	0.219209	-0.728453	0.219209
RPS6KA2	-0.161726	0.5154	-0.476883	0.19074	-0.476883	0.19074	-0.291127	0.0592498	0.028679	0.933327	0.028679	0.933327	-0.284481	0.972727	0.241922	0.598783	0.241922	0.598783
RPS6KA4	0.767452	0.0196889	1.65757	0.00275427	1.65757	0.00275427	0.385495	0.494371	1.018	0.193702	1.018	0.193702	0.0805182	0.992554	-0.394418	0.460841	-0.394418	0.460841
RPUSD3	0.500142	0.0759362	1.11879	0.019954	1.11879	0.019954	0.0185128	0.929338	0.806087	0.148429	0.806087	0.148429	-0.0484477	0.992557	-0.651715	0.277403	-0.651715	0.277403
RQCD1	-0.559933	0.0528541	-0.787828	0.0461194	-0.787828	0.0461194	0.155029	0.694841	0.104049	0.77218	0.104049	0.77218	0.0418293	0.992557	0.331846	0.480141	0.331846	0.480141
RRAD	2.02584	0.00152901	2.78804	0.00013615	2.78804	0.00013615	-1.15005	0.00562646	0.961836	0.214691	0.961836	0.214691	0.402992	0.972727	-0.684724	0.266358	-0.684724	0.266358
RRAS	3.06412	0.000268709	3.79913	1.55516e-05	3.79913	1.55516e-05	-0.366915	0.36286	1.20764	0.151112	1.20764	0.151112	-0.442635	0.972727	-1.10081	0.16771	-1.10081	0.16771
RRBP1	1.69359	0.000763747	1.94245	0.000759393	1.94245	0.000759393	0.00207118	0.991879	0.200811	0.612683	0.200811	0.612683	-0.299388	0.972727	-0.877123	0.186505	-0.877123	0.186505
RUNDC1	0.0675812	0.781535	0.182446	0.620529	0.182446	0.620529	0.0743248	0.692804	0.0711187	0.863221	0.0711187	0.863221	-0.380651	0.972727	-0.221673	0.631541	-0.221673	0.631541
RUVBL2	-0.419482	0.126446	0.477132	0.192215	0.477132	0.192215	0.0101387	0.967121	0.714234	0.131519	0.714234	0.131519	0.101622	0.984416	-0.695093	0.217363	-0.695093	0.217363
RXRA	-0.590118	0.0664387	-0.0868866	0.834909	-0.0868866	0.834909	-0.113009	0.654328	0.301129	0.36923	0.301129	0.36923	0.137699	0.974689	-0.33654	0.50341	-0.33654	0.50341
S100A10	5.43166	5.3613e-05	5.67339	1.22095e-06	5.67339	1.22095e-06	-0.26649	0.373818	0.712869	0.24145	0.712869	0.24145	-0.320366	0.972727	0.133309	0.803541	0.133309	0.803541
S100A13	0.256332	0.402927	1.0963	0.0225867	1.0963	0.0225867	-0.130212	0.63379	0.848102	0.117522	0.848102	0.117522	0.065007	0.992554	-0.336977	0.532764	-0.336977	0.532764
S100A16	0.423616	0.131721	1.35357	0.00795852	1.35357	0.00795852	-0.644822	0.0444739	-0.0121731	0.980364	-0.0121731	0.980364	-0.0501597	0.992557	-0.40497	0.451522	-0.40497	0.451522
S100A4	1.01265	0.0139716	1.75105	0.00386845	1.75105	0.00386845	-2.14626	0.0219459	0.29655	0.625579	0.29655	0.625579	-0.101681	0.991525	-0.420839	0.482641	-0.420839	0.482641
SAC3D1	-0.629199	0.0925726	0.373993	0.380678	0.373993	0.380678	0.224277	0.604773	1.21155	0.0509502	1.21155	0.0509502	0.488031	0.972727	-0.248967	0.647467	-0.248967	0.647467
SAE1	-0.401268	0.136872	-0.0771473	0.846161	-0.0771473	0.846161	0.158406	0.470141	0.310654	0.403238	0.310654	0.403238	0.116193	0.979877	-0.503485	0.326769	-0.503485	0.326769
SAMD1	-0.514931	0.0827793	-0.101884	0.808794	-0.101884	0.808794	-0.623214	0.0829725	0.21792	0.562749	0.21792	0.562749	0.213816	0.972727	-0.326119	0.521521	-0.326119	0.521521
SART1	-0.691069	0.0265584	-0.195755	0.632652	-0.195755	0.632652	0.233293	0.493693	0.533098	0.16402	0.533098	0.16402	0.0845668	0.990647	-0.681637	0.250312	-0.681637	0.250312
SCAND1	-0.394086	0.220804	0.49063	0.221491	0.49063	0.221491	-0.0210871	0.957902	0.79293	0.191541	0.79293	0.191541	0.335378	0.972727	-0.526772	0.333587	-0.526772	0.333587
SCMH1	-0.557183	0.04387	-0.317181	0.397944	-0.317181	0.397944	-0.206761	0.407651	-0.350745	0.381096	-0.350745	0.381096	0.124851	0.972727	0.0426117	0.930151	0.0426117	0.930151
SCNM1	0.0473009	0.896576	-0.226863	0.650623	-0.226863	0.650623	0.264819	0.333958	-0.571054	0.28641	-0.571054	0.28641	0.669722	0.972727	0.63686	0.339666	0.63686	0.339666
SCRN2	0.641699	0.0374178	1.5419	0.00215053	1.5419	0.00215053	-0.443231	0.185896	0.726273	0.210331	0.726273	0.210331	0.0336492	0.992557	-0.864423	0.180861	-0.864423	0.180861
SDCCAG3	0.191803	0.43642	0.4529	0.265824	0.4529	0.265824	0.220576	0.442015	0.190869	0.718105	0.190869	0.718105	0.0832286	0.991525	0.191705	0.713892	0.191705	0.713892
SDF2	0.471387	0.117636	1.07123	0.0145662	1.07123	0.0145662	0.0348069	0.884199	0.716591	0.108922	0.716591	0.108922	0.107196	0.987552	-0.656973	0.240495	-0.656973	0.240495
SEC14L2	1.85665	0.00172712	2.44917	0.000156215	2.44917	0.000156215	0.0855838	0.688701	0.457958	0.299497	0.457958	0.299497	-0.379062	0.972727	-1.00251	0.164051	-1.00251	0.164051
SEC61B	0.118992	0.69818	0.306085	0.436759	0.306085	0.436759	-0.0358603	0.896295	0.884191	0.111582	0.884191	0.111582	0.134908	0.979877	-0.0991808	0.844837	-0.0991808	0.844837
SEC61G	0.362204	0.334097	-0.0721804	0.861748	-0.0721804	0.861748	-0.225896	0.367217	0.77046	0.0905591	0.77046	0.0905591	-0.0796729	0.992554	0.492209	0.349331	0.492209	0.349331
SELT	0.46276	0.077307	-0.330365	0.356662	-0.330365	0.356662	-0.127576	0.437394	0.607075	0.150883	0.607075	0.150883	0.0339862	0.992557	1.05368	0.153868	1.05368	0.153868
SENP2	0.0782294	0.810772	-0.984624	0.0550188	-0.984624	0.0550188	0.247004	0.291601	-0.267876	0.454484	-0.267876	0.454484	0.0351468	0.992767	1.25112	0.165265	1.25112	0.165265
SENP3	-0.19618	0.488802	0.351072	0.395843	0.351072	0.395843	NA	NA	NA	NA	NA	NA	0.172825	0.972727	-0.444555	0.411063	-0.444555	0.411063
SEPW1	0.625926	0.0638794	1.73035	0.00216417	1.73035	0.00216417	0.130525	0.508233	0.813796	0.085113	0.813796	0.085113	0.247221	0.972727	-0.472454	0.385601	-0.472454	0.385601
SERF2	0.191142	0.543717	1.16687	0.0182081	1.16687	0.0182081	-0.256849	0.495048	0.655607	0.0883805	0.655607	0.0883805	0.165829	0.972727	-0.310882	0.568846	-0.310882	0.568846
SERPINB8	0.789356	0.0155923	0.459763	0.313067	0.459763	0.313067	-0.340136	0.25827	-1.04994	0.0727004	-1.04994	0.0727004	0.00207527	0.999144	0.324721	0.576139	0.324721	0.576139
SERTAD1	0.795652	0.0395405	1.63032	0.00315463	1.63032	0.00315463	-0.0305361	0.92105	1.13298	0.0221423	1.13298	0.0221423	0.258616	0.972727	-0.577453	0.317468	-0.577453	0.317468
SESN2	0.232336	0.39681	0.886547	0.0397294	0.886547	0.0397294	0.109454	0.567291	0.390622	0.341478	0.390622	0.341478	-0.0198521	0.99545	-0.727344	0.22775	-0.727344	0.22775
SF3B5	-0.406783	0.182185	0.338408	0.464711	0.338408	0.464711	-0.11903	0.411941	0.900121	0.0553261	0.900121	0.0553261	0.265511	0.972727	-0.210148	0.724816	-0.210148	0.724816
SFXN1	0.194623	0.437935	-0.612404	0.127346	-0.612404	0.127346	0.00131458	0.993565	-0.515221	0.171586	-0.515221	0.171586	-0.0705233	0.992554	0.318515	0.523904	0.318515	0.523904
SFXN2	-0.625424	0.051947	-0.237573	0.510434	-0.237573	0.510434	NA	NA	NA	NA	NA	NA	0.281314	0.972727	-0.272464	0.550975	-0.272464	0.550975
SH3BGRL3	0.909485	0.0159554	1.90421	0.00171472	1.90421	0.00171472	0.350904	0.0710039	0.996423	0.0683433	0.996423	0.0683433	0.208438	0.972727	-0.212383	0.703718	-0.212383	0.703718
SHARPIN	0.131144	0.642952	0.889313	0.0438723	0.889313	0.0438723	-0.0430308	0.884643	0.57095	0.270272	0.57095	0.270272	0.159738	0.972727	-0.37855	0.470932	-0.37855	0.470932
SIAH2	-0.112938	0.681722	-0.405657	0.313289	-0.405657	0.313289	0.214049	0.320559	0.657856	0.122809	0.657856	0.122809	-0.147025	0.972727	0.00535808	0.993275	0.00535808	0.993275
SIRPA	-2.07949	0.000625712	-1.76709	0.00133888	-1.76709	0.00133888	0.128429	0.390784	0.756801	0.0945209	0.756801	0.0945209	0.244782	0.972727	-0.00347557	0.995438	-0.00347557	0.995438
SIRT2	0.710771	0.0264099	1.45189	0.00545118	1.45189	0.00545118	-0.0248409	0.91337	0.814478	0.156172	0.814478	0.156172	0.0342047	0.992557	-0.603986	0.296462	-0.603986	0.296462
SIRT5	-0.114116	0.677116	-0.312003	0.4101	-0.312003	0.4101	0.0179248	0.927809	0.0484541	0.888576	0.0484541	0.888576	-0.147606	0.972727	-0.075277	0.878766	-0.075277	0.878766
SIRT7	0.177912	0.539473	1.01691	0.0200007	1.01691	0.0200007	0.393015	0.252202	1.80596	0.0129096	1.80596	0.0129096	0.0334104	0.992767	-0.528231	0.317795	-0.528231	0.317795
SKP2	-0.159302	0.468595	-0.797947	0.066531	-0.797947	0.066531	-0.224335	0.421115	0.32285	0.589266	0.32285	0.589266	0.0852823	0.986098	0.48205	0.376649	0.48205	0.376649
SLC16A2	-0.390311	0.124192	-0.383248	0.284976	-0.383248	0.284976	-0.0253301	0.904793	0.239185	0.57741	0.239185	0.57741	0.0986063	0.984012	-0.0659617	0.887321	-0.0659617	0.887321
SLC25A1	-0.0290643	0.920583	0.847632	0.0585929	0.847632	0.0585929	0.0365789	0.921833	0.498225	0.361789	0.498225	0.361789	0.176031	0.972727	-0.665854	0.270518	-0.665854	0.270518
SLC25A11	0.566925	0.0446563	1.39461	0.00577135	1.39461	0.00577135	0.114994	0.555088	0.873092	0.123154	0.873092	0.123154	0.129093	0.972727	-0.711707	0.23611	-0.711707	0.23611
SLC25A19	0.254678	0.262744	0.759549	0.117386	0.759549	0.117386	0.252266	0.327409	0.491097	0.363441	0.491097	0.363441	0.0282523	0.992557	-0.505832	0.412244	-0.505832	0.412244
SLC27A5	0.0681874	0.842545	1.19561	0.0165029	1.19561	0.0165029	-0.102544	0.527351	0.494488	0.216675	0.494488	0.216675	-0.0149048	0.99683	-0.563367	0.336136	-0.563367	0.336136
SLC2A4RG	0.0183471	0.94853	0.930638	0.0458532	0.930638	0.0458532	NA	NA	NA	NA	NA	NA	0.286379	0.972727	-0.267777	0.626365	-0.267777	0.626365
SLC35A4	-0.0872871	0.751902	0.511752	0.294115	0.511752	0.294115	-0.182575	0.361679	0.240149	0.579482	0.240149	0.579482	0.285906	0.972727	-0.312687	0.614599	-0.312687	0.614599
SLC35F3	0.552601	0.141214	0.773484	0.0658177	0.773484	0.0658177	0.496571	0.0702049	0.634942	0.0754092	0.634942	0.0754092	0.0429016	0.992557	0.0956888	0.851245	0.0956888	0.851245
SLC37A4	0.0191295	0.943721	0.908954	0.0292288	0.908954	0.0292288	0.239053	0.195697	0.884567	0.155843	0.884567	0.155843	0.216031	0.972727	-0.60525	0.265379	-0.60525	0.265379
SLC39A4	1.29486	0.307403	1.32855	0.0519147	1.32855	0.0519147	-0.63124	0.131342	0.812268	0.191559	0.812268	0.191559	-0.535603	0.982017	-0.572149	0.484404	-0.572149	0.484404
SLC40A1	0.546733	0.564514	-0.0615608	0.935235	-0.0615608	0.935235	-0.405258	0.162474	-0.332147	0.500488	-0.332147	0.500488	-0.374073	0.984251	0.843755	0.364949	0.843755	0.364949
SLC41A1	0.813084	0.0175587	0.149866	0.700807	0.149866	0.700807	-0.134161	0.580656	-0.681111	0.089127	-0.681111	0.089127	-0.179709	0.972727	0.420391	0.39719	0.420391	0.39719
SLC41A3	0.0826261	0.747019	0.853361	0.0410332	0.853361	0.0410332	0.0175278	0.907281	0.878201	0.0821976	0.878201	0.0821976	0.0939226	0.987218	-0.570191	0.291486	-0.570191	0.291486
SLC7A6OS	0.252257	0.331998	0.00732488	0.986306	0.00732488	0.986306	-0.25385	0.324199	0.00582622	0.989793	0.00582622	0.989793	-0.226097	0.972727	-0.202755	0.679038	-0.202755	0.679038
SMAD3	-0.308008	0.196072	-0.236287	0.612656	-0.236287	0.612656	-0.253744	0.20897	-0.270302	0.45069	-0.270302	0.45069	0.00982656	0.997152	0.313418	0.591984	0.313418	0.591984
SMAD7	0.307761	0.476314	-0.781628	0.0628414	-0.781628	0.0628414	-0.252809	0.284544	0.490905	0.309904	0.490905	0.309904	-0.458282	0.972727	0.499181	0.349779	0.499181	0.349779
SMARCB1	-0.76417	0.0228114	-0.149866	0.695011	-0.149866	0.695011	NA	NA	NA	NA	NA	NA	0.198305	0.972727	-0.547644	0.29243	-0.547644	0.29243
SMUG1	-0.377138	0.128565	0.198225	0.681214	0.198225	0.681214	0.0567716	0.806935	1.14943	0.0758668	1.14943	0.0758668	0.230223	0.972727	-0.180064	0.768103	-0.180064	0.768103
SMURF1	0.607393	0.0582727	0.224506	0.565945	0.224506	0.565945	0.41855	0.0451502	0.241328	0.602399	0.241328	0.602399	-0.339094	0.972727	0.190361	0.701746	0.190361	0.701746
SMYD5	-0.502909	0.0764428	0.170716	0.680106	0.170716	0.680106	-0.149913	0.533989	0.342063	0.438585	0.342063	0.438585	0.206241	0.972727	-0.411857	0.431817	-0.411857	0.431817
SNCA	1.12177	0.00677702	0.452963	0.263149	0.452963	0.263149	0.368581	0.194551	0.547588	0.190067	0.547588	0.190067	-0.374617	0.972727	0.0168243	0.976525	0.0168243	0.976525
SNF8	-0.256014	0.452235	0.403663	0.3427	0.403663	0.3427	0.254425	0.468068	0.580271	0.202254	0.580271	0.202254	0.140424	0.984012	-0.151692	0.783653	-0.151692	0.783653
SNPH	1.2115	0.00743494	1.90671	0.000799428	1.90671	0.000799428	-0.108938	0.521097	0.335362	0.423026	0.335362	0.423026	0.0709522	0.992554	-0.456909	0.370519	-0.456909	0.370519
SNRPA	-0.519249	0.0611086	0.211892	0.560075	0.211892	0.560075	-0.241076	0.235955	0.219832	0.676189	0.219832	0.676189	0.147378	0.972727	-0.643689	0.235074	-0.643689	0.235074
SNRPB	-0.704517	0.0444204	-0.000824388	0.998534	-0.000824388	0.998534	0.119526	0.722809	0.943112	0.0681171	0.943112	0.0681171	0.343937	0.972727	-0.51576	0.323966	-0.51576	0.323966
SNRPD2	-0.185548	0.584914	0.464362	0.241847	0.464362	0.241847	-0.00570735	0.982837	0.50037	0.207696	0.50037	0.207696	0.177857	0.972727	-0.155559	0.762026	-0.155559	0.762026
SNRPD3	-0.185744	0.536439	-0.958006	0.0383913	-0.958006	0.0383913	-0.0881195	0.674749	-0.3901	0.327841	-0.3901	0.327841	0.113405	0.987552	0.572544	0.325652	0.572544	0.325652
SNRPF	-0.205202	0.37822	-1.05026	0.0136693	-1.05026	0.0136693	-0.204053	0.435582	0.483974	0.282092	0.483974	0.282092	0.0577262	0.992554	0.670007	0.226481	0.670007	0.226481
SNRPN	0.30671	0.237558	0.311843	0.431394	0.311843	0.431394	0.530564	0.0836671	-0.299022	0.708051	-0.299022	0.708051	-0.126585	0.974689	-0.189512	0.70958	-0.189512	0.70958
SNX11	0.25831	0.339843	1.03257	0.0266462	1.03257	0.0266462	-0.0104628	0.957181	0.615522	0.190041	0.615522	0.190041	0.160264	0.972727	-0.135803	0.80053	-0.135803	0.80053
SNX12	-0.275069	0.275678	0.405911	0.341369	0.405911	0.341369	0.116237	0.743958	0.348956	0.416993	0.348956	0.416993	0.111694	0.980068	-0.395563	0.472485	-0.395563	0.472485
SNX17	-1.22771	0.00459771	-0.470627	0.237906	-0.470627	0.237906	0.206918	0.276699	0.775902	0.119961	0.775902	0.119961	0.224717	0.972727	-0.535968	0.326009	-0.535968	0.326009
SNX5	0.293537	0.333907	-0.494284	0.239096	-0.494284	0.239096	-0.166925	0.564594	-0.641407	0.152619	-0.641407	0.152619	-0.000873722	0.999144	0.69276	0.257177	0.69276	0.257177
SPAG7	-0.341688	0.194884	0.14399	0.720031	0.14399	0.720031	0.0177426	0.961795	0.788913	0.0565782	0.788913	0.0565782	0.139043	0.972727	-0.856799	0.192225	-0.856799	0.192225
SPCS1	0.29029	0.237371	0.151698	0.691862	0.151698	0.691862	0.128187	0.486295	0.581347	0.285251	0.581347	0.285251	0.107884	0.980068	0.299989	0.52564	0.299989	0.52564
SPHK1	-0.0597767	0.835528	0.663845	0.120594	0.663845	0.120594	NA	NA	NA	NA	NA	NA	0.35828	0.972727	-0.108298	0.840013	-0.108298	0.840013
SPSB1	0.162537	0.583758	0.164252	0.680468	0.164252	0.680468	NA	NA	NA	NA	NA	NA	-0.180014	0.972727	-0.0260849	0.960123	-0.0260849	0.960123
SPSB2	0.880061	0.0274864	1.49906	0.00597419	1.49906	0.00597419	-0.542733	0.411102	1.25351	0.0293613	1.25351	0.0293613	-0.33703	0.972727	-0.764003	0.239122	-0.764003	0.239122
SRM	-0.749489	0.0419485	-0.197793	0.653038	-0.197793	0.653038	0.166816	0.437272	0.925833	0.0336631	0.925833	0.0336631	0.423519	0.972727	0.18258	0.743079	0.18258	0.743079
SRXN1	0.942425	0.00706158	0.598336	0.11743	0.598336	0.11743	0.080619	0.649888	-0.140489	0.694135	-0.140489	0.694135	-0.457274	0.972727	0.302273	0.523529	0.302273	0.523529
SSBP3	-1.20113	0.00353035	-1.43368	0.00289663	-1.43368	0.00289663	0.203727	0.404694	0.391412	0.310035	0.391412	0.310035	0.243596	0.972727	0.483279	0.329351	0.483279	0.329351
SSBP4	0.269988	0.303882	1.35911	0.0100521	1.35911	0.0100521	-0.439564	0.271025	0.365906	0.496361	0.365906	0.496361	0.150578	0.972727	-0.398895	0.478273	-0.398895	0.478273
SSNA1	-0.295184	0.340924	0.73414	0.104167	0.73414	0.104167	0.0032645	0.988406	0.939418	0.0452351	0.939418	0.0452351	0.394641	0.972727	-0.252744	0.649761	-0.252744	0.649761
SSSCA1	-0.208552	0.43487	0.56561	0.163159	0.56561	0.163159	-0.244028	0.445373	0.716157	0.0694243	0.716157	0.0694243	0.282501	0.972727	-0.583089	0.297147	-0.583089	0.297147
SSU72	-0.400959	0.190894	0.268028	0.50762	0.268028	0.50762	-0.0330813	0.854943	0.517655	0.205563	0.517655	0.205563	0.307213	0.972727	0.166259	0.750048	0.166259	0.750048
ST5	0.426132	0.107761	0.817388	0.0538634	0.817388	0.0538634	-0.0910576	0.651539	0.0496136	0.886982	0.0496136	0.886982	-0.0533392	0.992554	-0.334221	0.50885	-0.334221	0.50885
ST6GALNAC5	-1.86169	0.00112009	-3.0824	3.12617e-05	-3.0824	3.12617e-05	0.0942063	0.749705	0.567867	0.133671	0.567867	0.133671	0.202632	0.972727	0.927372	0.175803	0.927372	0.175803
STARD10	0.160039	0.569833	0.679867	0.115705	0.679867	0.115705	0.35324	0.532915	0.243743	0.725274	0.243743	0.725274	0.0943403	0.991525	-0.540978	0.342689	-0.540978	0.342689
STK19	-0.331736	0.249086	0.46187	0.262267	0.46187	0.262267	NA	NA	NA	NA	NA	NA	0.121171	0.981228	-0.471255	0.385601	-0.471255	0.385601
STK25	0.00222707	0.994011	0.480682	0.236891	0.480682	0.236891	0.235454	0.442116	0.679385	0.183871	0.679385	0.183871	0.264716	0.972727	-0.411498	0.434168	-0.411498	0.434168
STK35	-0.679744	0.0376909	-0.66488	0.105946	-0.66488	0.105946	0.0910206	0.66238	0.712002	0.103557	0.712002	0.103557	0.249607	0.972727	0.285356	0.572851	0.285356	0.572851
STRA13	-0.240539	0.469769	0.918222	0.0518216	0.918222	0.0518216	-0.0802418	0.801783	0.832491	0.0367834	0.832491	0.0367834	0.317669	0.972727	-0.403042	0.476464	-0.403042	0.476464
STX10	-0.0959307	0.773198	0.84284	0.0665834	0.84284	0.0665834	-0.135807	0.625293	0.913128	0.0267249	0.913128	0.0267249	0.31867	0.972727	-0.229252	0.679038	-0.229252	0.679038
STX6	0.189391	0.408165	-0.516693	0.161339	-0.516693	0.161339	-0.0224296	0.914238	-0.17693	0.630514	-0.17693	0.630514	-0.036849	0.992557	0.2399	0.603698	0.2399	0.603698
STYXL1	-0.256274	0.287408	0.464601	0.224881	0.464601	0.224881	0.0231142	0.904482	-0.513009	0.289398	-0.513009	0.289398	-0.0211814	0.99482	-0.806491	0.199669	-0.806491	0.199669
SULT1A1	0.645132	0.194248	2.245	0.000403127	2.245	0.000403127	0.149136	0.610806	0.446971	0.352216	0.446971	0.352216	0.22897	0.976717	-0.418495	0.426688	-0.418495	0.426688
SUMO3	-0.629372	0.0413859	-0.195578	0.623035	-0.195578	0.623035	0.0413906	0.790231	0.416302	0.266331	0.416302	0.266331	0.251141	0.972727	0.311514	0.531757	0.311514	0.531757
SUPT4H1	-0.47209	0.149709	0.180162	0.672316	0.180162	0.672316	-0.0568216	0.749451	0.58599	0.227942	0.58599	0.227942	0.297384	0.972727	-0.241326	0.648931	-0.241326	0.648931
SURF1	0.107451	0.720633	1.14156	0.0180389	1.14156	0.0180389	0.183093	0.616833	0.938549	0.0806343	0.938549	0.0806343	0.27737	0.972727	-0.256872	0.630718	-0.256872	0.630718
SURF2	-0.71208	0.056361	-0.139905	0.752559	-0.139905	0.752559	-0.0226055	0.937592	0.830099	0.0566501	0.830099	0.0566501	0.443514	0.972727	-0.223899	0.678664	-0.223899	0.678664
TAF10	0.0206479	0.94073	0.980014	0.0395265	0.980014	0.0395265	-0.276094	0.54972	0.357299	0.497611	0.357299	0.497611	0.172131	0.972727	-0.556696	0.346746	-0.556696	0.346746
TAF11	-0.105753	0.668554	-0.493967	0.187759	-0.493967	0.187759	0.0514411	0.833364	0.0734467	0.84016	0.0734467	0.84016	0.106667	0.980068	0.38347	0.426914	0.38347	0.426914
TAF12	0.090089	0.693838	-0.170498	0.681214	-0.170498	0.681214	-0.285088	0.333252	-0.26818	0.552186	-0.26818	0.552186	0.0895453	0.984012	0.0492551	0.925063	0.0492551	0.925063
TAF5L	-0.664579	0.0420862	-1.23578	0.00623	-1.23578	0.00623	-0.0121848	0.963813	-0.814777	0.0978342	-0.814777	0.0978342	0.0346446	0.992557	0.792894	0.193273	0.792894	0.193273
TAGLN	1.72971	0.00228784	2.49944	0.000111951	2.49944	0.000111951	-2.00525	0.0131936	0.426868	0.655356	0.426868	0.655356	0.245377	0.972727	-0.879691	0.180045	-0.879691	0.180045
TAGLN2	1.69616	0.00146203	2.41112	0.000191479	2.41112	0.000191479	-0.600003	0.11269	0.399864	0.42347	0.399864	0.42347	0.163819	0.972727	-0.793095	0.207129	-0.793095	0.207129
TALDO1	-0.407151	0.128574	0.104506	0.783274	0.104506	0.783274	0.052837	0.732279	0.519265	0.242004	0.519265	0.242004	0.117617	0.978374	-0.622501	0.244312	-0.622501	0.244312
TARBP2	-0.354984	0.245588	0.56281	0.174401	0.56281	0.174401	-0.107363	0.705373	0.621699	0.128318	0.621699	0.128318	0.354199	0.972727	-0.28796	0.580446	-0.28796	0.580446
TBC1D22A	-0.355782	0.169568	0.197804	0.621451	0.197804	0.621451	0.386699	0.119901	0.395513	0.354104	0.395513	0.354104	0.213239	0.972727	-0.557716	0.308153	-0.557716	0.308153
TBC1D7	0.630087	0.0338255	0.688694	0.0837259	0.688694	0.0837259	0.164655	0.434684	0.509223	0.358321	0.509223	0.358321	-0.143063	0.972727	-0.237592	0.625083	-0.237592	0.625083
TBPL1	-0.284838	0.228082	-1.0286	0.0150266	-1.0286	0.0150266	0.0238544	0.890159	0.535286	0.172963	0.535286	0.172963	0.127702	0.972727	0.942168	0.166499	0.942168	0.166499
TCEA2	-0.477011	0.114456	0.420943	0.30631	0.420943	0.30631	0.210483	0.528366	0.597269	0.208542	0.597269	0.208542	0.0720362	0.992554	-0.417567	0.435316	-0.417567	0.435316
TCEAL3	1.9142	0.000769634	1.42643	0.00481339	1.42643	0.00481339	-0.00178572	0.992331	0.0627287	0.888742	0.0627287	0.888742	-0.193026	0.972727	0.042402	0.934659	0.042402	0.934659
TCEAL8	-0.386663	0.210604	-1.15825	0.0276034	-1.15825	0.0276034	-0.129887	0.602154	-0.119429	0.768227	-0.119429	0.768227	-0.244565	0.972727	0.0538008	0.929758	0.0538008	0.929758
TCEB1	0.246787	0.3625	-0.263306	0.467605	-0.263306	0.467605	-0.0200029	0.902655	0.526239	0.144219	0.526239	0.144219	-0.0427415	0.992557	0.479507	0.332228	0.479507	0.332228
TCEB2	-0.628631	0.0818292	0.390487	0.359412	0.390487	0.359412	-0.031753	0.883239	0.812014	0.027129	0.812014	0.027129	0.401002	0.972727	-0.162625	0.769288	-0.162625	0.769288
TCF3	-0.657712	0.0450561	-0.973053	0.0223359	-0.973053	0.0223359	-0.54307	0.206301	0.150196	0.676608	0.150196	0.676608	0.191572	0.972727	0.34861	0.471279	0.34861	0.471279
TCF7L1	-0.675824	0.0472419	-0.636313	0.104349	-0.636313	0.104349	-0.47458	0.143546	-0.0283525	0.956975	-0.0283525	0.956975	0.131703	0.979877	0.207212	0.668346	0.207212	0.668346
TCP11L1	0.217582	0.366892	-0.192241	0.623121	-0.192241	0.623121	0.246155	0.388566	-0.635489	0.140113	-0.635489	0.140113	-0.563142	0.972727	0.053276	0.914675	0.053276	0.914675
TEPP	1.92072	0.000479156	0.241526	0.622458	0.241526	0.622458	NA	NA	NA	NA	NA	NA	-0.0473363	0.992554	0.656557	0.323758	0.656557	0.323758
TFPI	4.84799	0.00114259	3.69634	0.000114783	3.69634	0.000114783	NA	NA	NA	NA	NA	NA	-0.669828	0.972727	-0.0800461	0.91074	-0.0800461	0.91074
TFPT	-0.0760294	0.847192	0.469251	0.247572	0.469251	0.247572	NA	NA	NA	NA	NA	NA	-0.259861	0.972727	-0.943043	0.181885	-0.943043	0.181885
THOC5	-0.361335	0.150196	0.180944	0.628996	0.180944	0.628996	0.223928	0.225875	0.272415	0.608579	0.272415	0.608579	0.128723	0.972727	-0.329936	0.485342	-0.329936	0.485342
TIMELESS	-0.740452	0.0196488	-0.817562	0.0443303	-0.817562	0.0443303	-1.01013	0.0378786	-1.11764	0.042271	-1.11764	0.042271	-0.0135629	0.996178	0.164956	0.733524	0.164956	0.733524
TIMM10	-0.266084	0.450914	0.385818	0.388551	0.385818	0.388551	-0.182556	0.357808	0.499738	0.290312	0.499738	0.290312	0.322704	0.972727	0.0198517	0.974876	0.0198517	0.974876
TIMM13	-0.50032	0.199615	0.497548	0.240828	0.497548	0.240828	-0.0841437	0.736427	0.668983	0.0678661	0.668983	0.0678661	0.44461	0.972727	-0.257712	0.633207	-0.257712	0.633207
TIMM17B	0.060812	0.831978	0.719641	0.0959608	0.719641	0.0959608	0.0933332	0.633065	1.07699	0.0271445	1.07699	0.0271445	0.252156	0.972727	-0.386903	0.470932	-0.386903	0.470932
TIMM22	-0.228378	0.446321	0.468814	0.33375	0.468814	0.33375	NA	NA	NA	NA	NA	NA	0.186426	0.972727	-0.124053	0.8428	-0.124053	0.8428
TIMM23	0.14739	0.552134	0.188895	0.632035	0.188895	0.632035	0.0563523	0.824896	-0.175392	0.700474	-0.175392	0.700474	-0.0217421	0.99482	-0.128961	0.797374	-0.128961	0.797374
TIMM50	-0.292414	0.292087	0.737883	0.0668444	0.737883	0.0668444	0.156586	0.424686	0.855265	0.0946844	0.855265	0.0946844	0.285104	0.972727	-0.632383	0.25573	-0.632383	0.25573
TIMM8B	-0.198938	0.544329	0.663712	0.137932	0.663712	0.137932	-0.163186	0.597533	0.430936	0.29207	0.430936	0.29207	0.314069	0.972727	-0.0593341	0.916547	-0.0593341	0.916547
TIMP3	2.38781	0.00028605	2.11866	0.000439706	2.11866	0.000439706	-0.833091	0.0111727	-0.0185558	0.973738	-0.0185558	0.973738	-0.313232	0.972727	-0.237746	0.630068	-0.237746	0.630068
TMED3	0.696576	0.0316277	1.7302	0.00249086	1.7302	0.00249086	0.319387	0.173973	1.19511	0.0246471	1.19511	0.0246471	0.148916	0.972727	-0.40741	0.456919	-0.40741	0.456919
TMEM106C	-0.270492	0.334381	0.483325	0.201291	0.483325	0.201291	-0.0444524	0.801771	0.100914	0.831327	0.100914	0.831327	0.097676	0.990269	0.0922465	0.848392	0.0922465	0.848392
TMEM11	-0.361164	0.24703	-0.0956191	0.818913	-0.0956191	0.818913	-0.175871	0.538138	0.982889	0.0364871	0.982889	0.0364871	0.142408	0.979452	-0.0778493	0.880068	-0.0778493	0.880068
TMEM134	0.452317	0.109888	1.71526	0.00153667	1.71526	0.00153667	0.0206488	0.955962	0.824415	0.0661192	0.824415	0.0661192	0.000674064	0.999144	-0.858209	0.191008	-0.858209	0.191008
TMEM136	0.304718	0.202998	-0.0286609	0.941771	-0.0286609	0.941771	0.319921	0.126584	0.0649826	0.854801	0.0649826	0.854801	0.15504	0.972727	0.615196	0.251101	0.615196	0.251101
TMEM141	1.07571	0.00434396	2.01282	0.000860303	2.01282	0.000860303	0.212755	0.373968	0.9188	0.0328337	0.9188	0.0328337	-0.0154152	0.99545	-0.564361	0.317973	-0.564361	0.317973
TMEM18	0.109606	0.692235	0.242694	0.506738	0.242694	0.506738	0.0904719	0.650141	0.131826	0.691222	0.131826	0.691222	0.0371164	0.992557	-0.215923	0.641522	-0.215923	0.641522
TMEM42	-0.749346	0.0179251	0.325718	0.432619	0.325718	0.432619	0.187158	0.231074	0.823338	0.0955912	0.823338	0.0955912	-0.182018	0.972727	-0.987388	0.179254	-0.987388	0.179254
TMEM54	0.692856	0.202411	1.77241	0.0150502	1.77241	0.0150502	0.290467	0.492311	0.372098	0.565566	0.372098	0.565566	-0.756461	0.972727	-0.987626	0.270697	-0.987626	0.270697
TMEM55B	0.0965627	0.742297	0.673507	0.121729	0.673507	0.121729	0.171175	0.544813	0.620898	0.207345	0.620898	0.207345	0.124775	0.980068	-0.311714	0.562512	-0.311714	0.562512
TMEM99	-0.124171	0.643901	0.510151	0.213063	0.510151	0.213063	-0.104953	0.696006	0.765136	0.153808	0.765136	0.153808	0.55189	0.972727	0.143374	0.785712	0.143374	0.785712
TMSB10	0.818996	0.0416324	1.34661	0.0062943	1.34661	0.0062943	0.456964	0.047472	0.766236	0.0663111	0.766236	0.0663111	0.132981	0.984416	-0.0019842	0.996847	-0.0019842	0.996847
TNFAIP1	0.838951	0.0113652	0.958431	0.023892	0.958431	0.023892	0.123103	0.564006	0.000213918	0.999638	0.000213918	0.999638	-0.176919	0.972727	-0.114104	0.813739	-0.114104	0.813739
TNFAIP2	2.12768	0.00114259	2.79358	0.000133199	2.79358	0.000133199	-0.0322504	0.880839	1.04377	0.123613	1.04377	0.123613	-0.549569	0.972727	-1.16506	0.160623	-1.16506	0.160623
TNFRSF14	-0.682247	0.112994	-0.606097	0.467194	-0.606097	0.467194	NA	NA	NA	NA	NA	NA	0.110782	0.992554	-0.261972	0.806993	-0.261972	0.806993
TNNT1	3.91765	0.00031944	3.22602	0.00121938	3.22602	0.00121938	0.200012	0.603025	0.514242	0.287186	0.514242	0.287186	-0.271636	0.972727	-0.885976	0.346808	-0.885976	0.346808
TOMM22	-0.638272	0.0752461	0.292861	0.491573	0.292861	0.491573	-0.0313151	0.889686	0.810296	0.0706037	0.810296	0.0706037	0.112957	0.990269	-0.0491235	0.928919	-0.0491235	0.928919
TOMM34	-0.00521501	0.984836	0.164574	0.675349	0.164574	0.675349	0.0906353	0.754323	0.00796525	0.983804	0.00796525	0.983804	-0.0500944	0.992554	-0.479163	0.353272	-0.479163	0.353272
TOMM40	-0.337638	0.247187	0.108763	0.795007	0.108763	0.795007	-0.0265556	0.947951	0.60719	0.30616	0.60719	0.30616	0.290809	0.972727	-0.460963	0.380664	-0.460963	0.380664
TP53RK	-0.0285367	0.913553	0.00780765	0.984657	0.00780765	0.984657	-0.0599725	0.871269	0.405403	0.425231	0.405403	0.425231	-0.129126	0.972727	-0.186797	0.693961	-0.186797	0.693961
TPD52	-0.66572	0.020804	-1.5434	0.00239045	-1.5434	0.00239045	0.159048	0.473836	-0.245371	0.520454	-0.245371	0.520454	0.264813	0.972727	0.786424	0.201283	0.786424	0.201283
TPD52L2	-0.0988847	0.696699	0.109523	0.800144	0.109523	0.800144	-0.0565832	0.76754	0.441384	0.30783	0.441384	0.30783	0.0927507	0.987552	-0.202836	0.700204	-0.202836	0.700204
TPI1	0.0281429	0.926761	0.744027	0.083356	0.744027	0.083356	0.16469	0.402371	0.887697	0.0678379	0.887697	0.0678379	0.238407	0.972727	-0.729278	0.236565	-0.729278	0.236565
TPM1	1.02423	0.00539407	1.02841	0.0225802	1.02841	0.0225802	-0.305219	0.188963	-0.128907	0.742676	-0.128907	0.742676	0.0147552	0.99545	0.075271	0.883753	0.075271	0.883753
TPM2	2.16743	0.000941685	3.36585	1.7045e-05	3.36585	1.7045e-05	-1.66452	0.0212024	0.056341	0.941951	0.056341	0.941951	0.220279	0.972727	-0.670813	0.240522	-0.670813	0.240522
TPM4	0.606348	0.02772	-0.446695	0.302742	-0.446695	0.302742	-0.256386	0.0962987	-0.172625	0.685437	-0.172625	0.685437	-0.110366	0.973712	1.05267	0.175414	1.05267	0.175414
TPST1	0.956412	0.0226475	0.545521	0.180536	0.545521	0.180536	0.650095	0.123994	-0.0291732	0.934983	-0.0291732	0.934983	-0.291365	0.972727	-0.010415	0.986268	-0.010415	0.986268
TPST2	1.56558	0.00192003	2.04151	0.000846968	2.04151	0.000846968	0.158178	0.446741	0.95273	0.160241	0.95273	0.160241	-0.051486	0.992557	-0.136916	0.79822	-0.136916	0.79822
TRAF3IP2	1.47259	0.0250676	1.51282	0.00248157	1.51282	0.00248157	-0.546648	0.0303307	0.493759	0.401965	0.493759	0.401965	0.0409522	0.995244	-0.708059	0.217868	-0.708059	0.217868
TRAF7	0.433381	0.12272	1.14174	0.0187696	1.14174	0.0187696	-0.364954	0.167024	-0.0712481	0.911137	-0.0712481	0.911137	0.0458128	0.992557	-0.343158	0.524257	-0.343158	0.524257
TRAPPC1	0.255417	0.341432	0.853047	0.0579676	0.853047	0.0579676	0.287545	0.0991595	0.950053	0.121821	0.950053	0.121821	0.136394	0.973677	-0.171355	0.755289	-0.171355	0.755289
TRAPPC3	0.392432	0.140759	0.904297	0.0452461	0.904297	0.0452461	0.00431977	0.983131	0.382977	0.36472	0.382977	0.36472	0.0256724	0.994406	-0.302744	0.568601	-0.302744	0.568601
TRAPPC6A	-0.770615	0.03049	0.0715034	0.88206	0.0715034	0.88206	-0.00420141	0.984274	1.08659	0.00938748	1.08659	0.00938748	-0.10932	0.987552	-0.569058	0.34963	-0.569058	0.34963
TRIAP1	0.12515	0.618802	-0.392345	0.275647	-0.392345	0.275647	0.0446629	0.845994	0.447168	0.340378	0.447168	0.340378	0.108386	0.980068	0.536375	0.290501	0.536375	0.290501
TRIM26	-0.25856	0.270459	0.0481795	0.903965	0.0481795	0.903965	NA	NA	NA	NA	NA	NA	0.0789787	0.991525	-0.441601	0.372043	-0.441601	0.372043
TRIM41	-0.823371	0.024837	-0.252829	0.560543	-0.252829	0.560543	0.0435732	0.777397	0.0858674	0.811863	0.0858674	0.811863	0.346971	0.972727	-0.187199	0.736874	-0.187199	0.736874
TRIP6	0.76804	0.0179703	1.5144	0.00291167	1.5144	0.00291167	-0.724075	0.00877967	0.267224	0.55707	0.267224	0.55707	0.119187	0.974689	-0.756188	0.212163	-0.756188	0.212163
TRPT1	0.400731	0.134056	1.41016	0.005152	1.41016	0.005152	0.0179413	0.933405	0.553073	0.22442	0.553073	0.22442	0.0380495	0.992557	-0.729636	0.22775	-0.729636	0.22775
TSEN54	-0.395833	0.178579	0.546606	0.164992	0.546606	0.164992	NA	NA	NA	NA	NA	NA	0.384704	0.972727	-0.457042	0.374985	-0.457042	0.374985
TSPAN4	0.738865	0.0264124	2.24017	0.00040193	2.24017	0.00040193	-0.0290458	0.932339	1.17797	0.10444	1.17797	0.10444	0.294905	0.972727	-0.557689	0.317607	-0.557689	0.317607
TSSC1	-0.348101	0.182847	0.0242225	0.955712	0.0242225	0.955712	-0.155524	0.422589	1.22956	0.0512855	1.22956	0.0512855	0.119097	0.977512	-0.547772	0.330555	-0.547772	0.330555
TSSC4	-0.630033	0.0727247	0.247987	0.52264	0.247987	0.52264	-0.098583	0.817345	0.760902	0.196301	0.760902	0.196301	0.315871	0.972727	-0.522453	0.324189	-0.522453	0.324189
TST	-0.652084	0.0433212	0.119748	0.758308	0.119748	0.758308	-0.62143	0.034644	0.987412	0.068234	0.987412	0.068234	0.274237	0.972727	-0.705906	0.218896	-0.705906	0.218896
TSTA3	-0.178342	0.598967	0.628536	0.146	0.628536	0.146	NA	NA	NA	NA	NA	NA	0.217522	0.972727	-0.517753	0.361907	-0.517753	0.361907
TTLL12	-1.01885	0.0104991	-0.257049	0.515104	-0.257049	0.515104	0.148766	0.615567	0.79774	0.161417	0.79774	0.161417	0.236596	0.972727	-0.535825	0.32222	-0.535825	0.32222
TUBB	-0.557703	0.0492047	0.175379	0.635087	0.175379	0.635087	0.13519	0.886824	0.387152	0.723713	0.387152	0.723713	0.178882	0.972727	-0.642919	0.237011	-0.642919	0.237011
TUFM	-0.0356128	0.902104	0.946555	0.0231057	0.946555	0.0231057	0.0723264	0.687158	1.15937	0.0190503	1.15937	0.0190503	0.224442	0.972727	-0.793257	0.197335	-0.793257	0.197335
TUSC2	-0.201108	0.488632	0.666341	0.122625	0.666341	0.122625	0.0738284	0.754918	0.811364	0.141841	0.811364	0.141841	0.203093	0.972727	-0.245946	0.646291	-0.245946	0.646291
TWISTNB	0.34465	0.361797	-0.735059	0.119824	-0.735059	0.119824	0.210007	0.424788	-0.343176	0.37974	-0.343176	0.37974	-0.197089	0.972727	0.403022	0.493812	0.403022	0.493812
TXN	0.15932	0.621855	-0.357709	0.327584	-0.357709	0.327584	-0.00195813	0.994119	0.484855	0.241676	0.484855	0.241676	-0.124566	0.984251	0.251933	0.589579	0.251933	0.589579
TXN2	-0.406432	0.150165	0.300041	0.509664	0.300041	0.509664	-0.0097771	0.958644	0.660328	0.102901	0.660328	0.102901	0.312006	0.972727	-0.435746	0.456494	-0.435746	0.456494
TXNL4B	-0.955517	0.00740781	-0.956063	0.0307422	-0.956063	0.0307422	-0.0037545	0.981625	-0.025204	0.947077	-0.025204	0.947077	0.398898	0.972727	0.323233	0.525247	0.323233	0.525247
UAP1L1	4.0995	6.81898e-05	4.99612	1.94342e-06	4.99612	1.94342e-06	-0.210647	0.712087	-0.740968	0.0865635	-0.740968	0.0865635	-0.116277	0.973953	-0.634656	0.265904	-0.634656	0.265904
UBE2A	0.599065	0.0315313	-0.0971061	0.826445	-0.0971061	0.826445	-0.12017	0.597918	0.234127	0.502205	0.234127	0.502205	-0.0027479	0.998911	0.332764	0.534147	0.332764	0.534147
UBE2D4	-0.835829	0.0136144	-0.662146	0.0997359	-0.662146	0.0997359	0.00877365	0.976844	-0.109656	0.782225	-0.109656	0.782225	0.343626	0.972727	0.747127	0.217263	0.747127	0.217263
UBE2E2	-0.617188	0.0325062	-0.813993	0.0423436	-0.813993	0.0423436	0.366376	0.113368	0.245186	0.512435	0.245186	0.512435	-0.155191	0.972727	-0.0789858	0.868606	-0.0789858	0.868606
UBE2M	0.0134206	0.964171	0.629351	0.152429	0.629351	0.152429	0.167786	0.364986	0.62651	0.065391	0.62651	0.065391	0.141077	0.973712	-0.235867	0.669243	-0.235867	0.669243
UBL5	-0.0677352	0.843071	0.540242	0.204083	0.540242	0.204083	-0.0266099	0.882677	0.772087	0.102041	0.772087	0.102041	0.260609	0.972727	0.125495	0.817504	0.125495	0.817504
UBOX5	-0.522422	0.0670209	0.0633728	0.875347	0.0633728	0.875347	0.225399	0.296127	-0.300673	0.563945	-0.300673	0.563945	0.093524	0.987732	-0.559514	0.293897	-0.559514	0.293897
UBQLN1	0.342295	0.313629	-1.00444	0.0714323	-1.00444	0.0714323	0.290567	0.189813	-0.298227	0.4683	-0.298227	0.4683	-0.15505	0.979877	0.71631	0.324916	0.71631	0.324916
UBTD1	1.34513	0.002681	2.1402	0.000947596	2.1402	0.000947596	-0.0754499	0.871384	1.1526	0.051332	1.1526	0.051332	-0.0197742	0.995244	-0.430738	0.452336	-0.430738	0.452336
UCK1	-0.812662	0.0309931	-0.0865993	0.848449	-0.0865993	0.848449	0.104294	0.519558	0.566708	0.29276	0.566708	0.29276	0.414818	0.972727	0.0552619	0.920348	0.0552619	0.920348
UCKL1	-0.479607	0.150196	-0.0428821	0.91383	-0.0428821	0.91383	0.0924032	0.659469	1.30185	0.0946705	1.30185	0.0946705	0.34131	0.972727	-0.360764	0.451522	-0.360764	0.451522
UFC1	-0.618686	0.0433212	-0.942164	0.0249576	-0.942164	0.0249576	-0.0898468	0.553733	0.359153	0.408505	0.359153	0.408505	0.0291999	0.992767	0.12421	0.797602	0.12421	0.797602
UNC13B	-0.20522	0.366639	-0.892301	0.0648311	-0.892301	0.0648311	0.288402	0.272138	-0.621112	0.0912432	-0.621112	0.0912432	-0.310206	0.972727	0.492085	0.409942	0.492085	0.409942
UPP1	1.3511	0.00234787	1.91155	0.00105244	1.91155	0.00105244	-0.267116	0.343848	1.07581	0.0612101	1.07581	0.0612101	0.0811605	0.992554	-0.499482	0.356422	-0.499482	0.356422
UQCRH	-0.243572	0.478063	0.30472	0.449777	0.30472	0.449777	0.18678	0.316124	0.84679	0.102262	0.84679	0.102262	0.162678	0.976478	-0.0529028	0.919454	-0.0529028	0.919454
UQCRQ	0.177882	0.628152	1.27623	0.00940982	1.27623	0.00940982	0.0854375	0.61314	0.697953	0.12657	0.697953	0.12657	0.157983	0.980068	-0.154273	0.769288	-0.154273	0.769288
UROS	-0.0583383	0.843957	0.616711	0.125899	0.616711	0.125899	0.57808	0.251148	0.581233	0.336274	0.581233	0.336274	0.199618	0.972727	-0.117628	0.816649	-0.117628	0.816649
USP21	-0.674249	0.0235609	-0.118372	0.774539	-0.118372	0.774539	0.444748	0.26557	-0.0208348	0.973459	-0.0208348	0.973459	0.123306	0.972727	-0.169605	0.738132	-0.169605	0.738132
USP46	-0.221173	0.494486	-1.16471	0.0194001	-1.16471	0.0194001	-0.186338	0.292177	-0.401841	0.319339	-0.401841	0.319339	0.212612	0.972727	0.992867	0.185808	0.992867	0.185808
UXT	-0.705869	0.0610951	0.0808338	0.85144	0.0808338	0.85144	-0.110965	0.521583	0.375421	0.416171	0.375421	0.416171	0.191868	0.972727	0.00281668	0.996328	0.00281668	0.996328
VAMP3	1.15794	0.0028267	0.0915289	0.814293	0.0915289	0.814293	0.00613374	0.976828	-0.372496	0.412468	-0.372496	0.412468	-0.199572	0.972727	0.85885	0.181885	0.85885	0.181885
VAMP4	1.12426	0.0285934	-0.0898697	0.821671	-0.0898697	0.821671	0.0670694	0.696932	0.245748	0.535324	0.245748	0.535324	-0.323772	0.972727	0.436591	0.382515	0.436591	0.382515
VAMP8	4.32581	0.000270193	5.78527	1.70964e-06	5.78527	1.70964e-06	-0.53239	0.286055	-0.388236	0.545849	-0.388236	0.545849	0.0239926	0.996017	-0.31151	0.584206	-0.31151	0.584206
VDAC1	0.318984	0.168164	-0.477623	0.297473	-0.477623	0.297473	0.213659	0.221917	-0.0923332	0.777818	-0.0923332	0.777818	-0.156444	0.972727	0.282545	0.628996	0.282545	0.628996
VDAC2	0.532033	0.0503534	0.620161	0.13793	0.620161	0.13793	0.144885	0.498116	0.122349	0.788838	0.122349	0.788838	-0.1802	0.972727	-0.325333	0.532614	-0.325333	0.532614
VPS25	-0.0188527	0.946992	0.51249	0.25006	0.51249	0.25006	0.0732147	0.70753	0.896098	0.0912737	0.896098	0.0912737	0.131826	0.973712	-0.705999	0.269471	-0.705999	0.269471
VPS26B	-0.209194	0.372798	0.129157	0.73904	0.129157	0.73904	0.144195	0.432438	0.468653	0.264617	0.468653	0.264617	-0.00490897	0.99807	-0.276972	0.557654	-0.276972	0.557654
VPS28	-0.337523	0.230517	0.460473	0.233453	0.460473	0.233453	0.0665472	0.681508	0.844408	0.0655921	0.844408	0.0655921	0.177499	0.972727	-0.80845	0.201283	-0.80845	0.201283
VPS72	-0.869189	0.0135163	-0.317242	0.39235	-0.317242	0.39235	-0.336941	0.155549	-0.0180229	0.965466	-0.0180229	0.965466	0.167077	0.972727	-0.464369	0.353077	-0.464369	0.353077
VRK3	-0.0725744	0.783924	0.49084	0.215376	0.49084	0.215376	-0.0745211	0.745032	0.315373	0.384812	0.315373	0.384812	0.0249422	0.994406	-0.534417	0.324107	-0.534417	0.324107
VTI1B	-0.0416763	0.882319	-0.530547	0.19501	-0.530547	0.19501	-0.112046	0.692313	-0.210431	0.610672	-0.210431	0.610672	0.12571	0.9756	1.086	0.162799	1.086	0.162799
WBSCR16	-0.618079	0.0476827	-0.14517	0.736252	-0.14517	0.736252	-0.0983087	0.624578	0.86775	0.113792	0.86775	0.113792	0.310663	0.972727	-0.446906	0.40858	-0.446906	0.40858
WDR13	-0.46477	0.0894739	0.385337	0.326017	0.385337	0.326017	0.0475023	0.816109	0.851324	0.0380834	0.851324	0.0380834	0.205916	0.972727	-0.334696	0.505664	-0.334696	0.505664
WDR18	-0.366837	0.178825	0.447853	0.228451	0.447853	0.228451	-0.0894355	0.739823	0.984329	0.109499	0.984329	0.109499	0.303585	0.972727	-0.665449	0.232522	-0.665449	0.232522
WDR4	-0.192224	0.460586	0.583627	0.136521	0.583627	0.136521	-0.0757568	0.703522	-0.0156572	0.973708	-0.0156572	0.973708	0.127122	0.974689	-0.610334	0.269036	-0.610334	0.269036
WDR46	-0.0996255	0.755449	0.463193	0.242233	0.463193	0.242233	NA	NA	NA	NA	NA	NA	0.143057	0.977929	-0.722052	0.22849	-0.722052	0.22849
WDR5	-0.644628	0.0302458	-0.483867	0.192183	-0.483867	0.192183	0.260253	0.279983	0.38513	0.446016	0.38513	0.446016	0.263485	0.972727	-0.0432137	0.92777	-0.0432137	0.92777
WDR54	-0.253273	0.296466	0.641363	0.100126	0.641363	0.100126	0.236812	0.17564	0.864942	0.0939159	0.864942	0.0939159	0.210183	0.972727	-0.732526	0.213926	-0.732526	0.213926
WDR76	0.0573721	0.860201	-0.909222	0.0493645	-0.909222	0.0493645	-0.320515	0.408964	0.776174	0.207731	0.776174	0.207731	-0.180158	0.972727	0.583641	0.323966	0.583641	0.323966
WDR77	-0.449221	0.086044	-0.0872439	0.819537	-0.0872439	0.819537	0.153786	0.341327	0.41683	0.35654	0.41683	0.35654	0.303306	0.972727	-0.375378	0.426773	-0.375378	0.426773
WIBG	-0.380311	0.16899	-0.158043	0.704985	-0.158043	0.704985	-0.118936	0.723146	0.654955	0.0509004	0.654955	0.0509004	0.126507	0.976478	-0.332843	0.518789	-0.332843	0.518789
WIPI1	2.21111	0.0014827	1.84637	0.00117219	1.84637	0.00117219	-0.0424771	0.805334	-0.536757	0.137905	-0.536757	0.137905	-0.755168	0.972727	-0.224046	0.656616	-0.224046	0.656616
YARS	0.325182	0.168805	0.764949	0.0531973	0.764949	0.0531973	0.232306	0.326252	0.282632	0.432962	0.282632	0.432962	-0.275827	0.972727	-0.65578	0.235898	-0.65578	0.235898
YBX1	-0.548731	0.0637699	-0.906031	0.0550026	-0.906031	0.0550026	-0.36744	0.149523	-0.333877	0.522218	-0.333877	0.522218	-0.153547	0.972727	-0.0577086	0.919492	-0.0577086	0.919492
YEATS4	-0.846158	0.0160868	-1.70663	0.0013583	-1.70663	0.0013583	0.070065	0.752389	-0.00178777	0.996345	-0.00178777	0.996345	0.606433	0.972727	0.566324	0.285292	0.566324	0.285292
YIF1A	0.609778	0.0433917	1.43741	0.0066434	1.43741	0.0066434	-0.265459	0.190778	0.911018	0.0385515	0.911018	0.0385515	-0.0195829	0.995244	-0.750058	0.238833	-0.750058	0.238833
YIF1B	1.20318	0.00441388	2.09525	0.000639704	2.09525	0.000639704	-0.0642819	0.78362	1.08665	0.0833892	1.08665	0.0833892	-0.0162082	0.99545	-0.897176	0.192225	-0.897176	0.192225
YIPF1	0.205879	0.391952	0.698884	0.0662786	0.698884	0.0662786	0.143676	0.558225	0.405077	0.482091	0.405077	0.482091	0.0134402	0.996178	-0.332368	0.472792	-0.332368	0.472792
YIPF2	1.15506	0.00499361	1.93982	0.00173484	1.93982	0.00173484	-0.0960638	0.748262	1.02232	0.0868217	1.02232	0.0868217	-0.152043	0.972727	-0.839171	0.221357	-0.839171	0.221357
YIPF3	-0.0114614	0.964567	0.704445	0.0847685	0.704445	0.0847685	0.111325	0.485104	0.96648	0.106385	0.96648	0.106385	0.23255	0.972727	-0.583795	0.290501	-0.583795	0.290501
YKT6	0.00734199	0.980108	1.03669	0.0294819	1.03669	0.0294819	0.241062	0.398227	-0.0150897	0.970357	-0.0150897	0.970357	0.148248	0.972727	-0.188055	0.734048	-0.188055	0.734048
YTHDF1	-0.0516312	0.830479	-0.651055	0.0863873	-0.651055	0.0863873	0.125816	0.545322	0.344366	0.296829	0.344366	0.296829	-0.132367	0.972727	0.372021	0.431652	0.372021	0.431652
ZBED4	-0.25638	0.310407	-1.40623	0.00597419	-1.40623	0.00597419	0.149364	0.465492	-0.0340683	0.933295	-0.0340683	0.933295	-0.0544822	0.992554	1.01741	0.170981	1.01741	0.170981
ZBTB8OS	0.392191	0.127753	-0.609901	0.129464	-0.609901	0.129464	0.0561592	0.783539	0.0327158	0.937132	0.0327158	0.937132	-0.0831369	0.990647	0.715789	0.229193	0.715789	0.229193
ZBTB9	-0.450135	0.0752811	-0.302198	0.407392	-0.302198	0.407392	NA	NA	NA	NA	NA	NA	-0.0303257	0.992557	-0.482966	0.332228	-0.482966	0.332228
ZCCHC17	0.0429702	0.866834	-0.18401	0.617371	-0.18401	0.617371	0.0264187	0.87672	0.0588827	0.874083	0.0588827	0.874083	-0.0668621	0.992554	0.418868	0.381452	0.418868	0.381452
ZCCHC3	-0.540301	0.067802	-0.442013	0.231073	-0.442013	0.231073	0.111769	0.637779	0.277832	0.414543	0.277832	0.414543	0.142958	0.972727	-0.122469	0.797166	-0.122469	0.797166
ZDHHC16	-0.127378	0.64635	0.896793	0.062472	0.896793	0.062472	0.171993	0.662733	0.747293	0.160712	0.747293	0.160712	0.329138	0.972727	0.0340125	0.954445	0.0340125	0.954445
ZDHHC18	-0.216642	0.39639	0.746964	0.113936	0.746964	0.113936	0.0520946	0.822522	1.31727	0.0559398	1.31727	0.0559398	0.26235	0.972727	-0.101527	0.864015	-0.101527	0.864015
ZDHHC3	-0.00623272	0.982018	0.144703	0.71771	0.144703	0.71771	0.300136	0.348806	0.352116	0.342725	0.352116	0.342725	0.134934	0.972727	0.30093	0.540639	0.30093	0.540639
ZFAND2B	0.174724	0.522625	0.932982	0.0352614	0.932982	0.0352614	0.00717456	0.972188	0.802135	0.0912834	0.802135	0.0912834	0.130728	0.974689	-0.431525	0.413147	-0.431525	0.413147
ZFAND3	-0.0633722	0.805227	-0.488198	0.216257	-0.488198	0.216257	-0.138353	0.661993	-0.35941	0.305115	-0.35941	0.305115	-0.0177597	0.99545	0.540219	0.318901	0.540219	0.318901
ZFPM1	-0.432728	0.110524	0.320071	0.442355	0.320071	0.442355	NA	NA	NA	NA	NA	NA	0.219453	0.972727	-0.359409	0.499809	-0.359409	0.499809
ZFYVE1	0.643597	0.0225844	0.819386	0.0414439	0.819386	0.0414439	0.0274011	0.895884	-0.3374	0.343301	-0.3374	0.343301	-0.0362862	0.992557	-0.348719	0.464419	-0.348719	0.464419
ZGPAT	-0.0883628	0.764662	0.70221	0.0882272	0.70221	0.0882272	-0.48353	0.163003	1.19011	0.0360271	1.19011	0.0360271	0.0586554	0.992554	-0.788844	0.210511	-0.788844	0.210511
ZMYND19	-0.725213	0.0587687	-0.0662829	0.884394	-0.0662829	0.884394	0.242075	0.430351	0.627372	0.0758165	0.627372	0.0758165	0.330591	0.972727	-0.0482066	0.930461	-0.0482066	0.930461
ZNF133	-0.568359	0.0597694	0.0429041	0.914513	0.0429041	0.914513	-0.155076	0.56657	0.937533	0.0637573	0.937533	0.0637573	-0.253082	0.972727	-0.214056	0.652356	-0.214056	0.652356
ZNF16	-0.924371	0.00772006	-0.900149	0.0333569	-0.900149	0.0333569	-0.0161853	0.933033	-0.398531	0.334686	-0.398531	0.334686	0.105906	0.979877	0.302698	0.536349	0.302698	0.536349
ZNF212	-0.769934	0.0193342	-0.37618	0.300606	-0.37618	0.300606	0.0839852	0.750242	0.901693	0.121272	0.901693	0.121272	0.206911	0.972727	-0.388623	0.413147	-0.388623	0.413147
ZNF213	-0.475653	0.0997961	0.214808	0.62149	0.214808	0.62149	-0.174002	0.569315	0.797763	0.228436	0.797763	0.228436	0.107612	0.984135	-0.365408	0.503672	-0.365408	0.503672
ZNF232	-0.751987	0.0639162	-1.3081	0.00549524	-1.3081	0.00549524	0.101631	0.649961	0.183272	0.627152	0.183272	0.627152	0.0960841	0.992554	0.636414	0.247465	0.636414	0.247465
ZNF3	-0.645502	0.0251023	-0.978325	0.0278934	-0.978325	0.0278934	-0.0855025	0.61846	0.0203208	0.953188	0.0203208	0.953188	-0.0372686	0.992557	0.405443	0.433928	0.405443	0.433928
ZNF32	-0.613805	0.047324	-0.0457488	0.905531	-0.0457488	0.905531	-0.0759877	0.688884	0.109162	0.821785	0.109162	0.821785	0.0887334	0.991525	0.436998	0.367003	0.436998	0.367003
ZNF35	0.0666783	0.838463	-0.69872	0.128834	-0.69872	0.128834	-0.212722	0.380042	-0.321128	0.53441	-0.321128	0.53441	-0.180977	0.972727	0.70351	0.274171	0.70351	0.274171
ZNF384	-0.622233	0.037822	-0.727133	0.0584215	-0.727133	0.0584215	-0.0838887	0.754971	0.258705	0.449177	0.258705	0.449177	0.176622	0.972727	0.217159	0.637372	0.217159	0.637372
ZNF394	-0.0229504	0.92523	-0.237414	0.524123	-0.237414	0.524123	-0.22181	0.491732	-0.24587	0.520198	-0.24587	0.520198	-0.185872	0.972727	0.0713251	0.882217	0.0713251	0.882217
ZNF410	0.211041	0.4143	-0.145499	0.707978	-0.145499	0.707978	0.0128111	0.936193	-0.0726594	0.846211	-0.0726594	0.846211	-0.25589	0.972727	0.160192	0.741768	0.160192	0.741768
ZNF488	-0.40928	0.213357	-0.149881	0.785885	-0.149881	0.785885	-0.0934288	0.733735	0.567897	0.367893	0.567897	0.367893	0.41303	0.972727	0.498807	0.459832	0.498807	0.459832
ZNF513	-1.36918	0.00362949	-0.840427	0.0466036	-0.840427	0.0466036	0.283961	0.23115	0.0152172	0.972313	0.0152172	0.972313	0.040644	0.992557	-0.259624	0.60176	-0.259624	0.60176
ZNF526	-0.588484	0.0462374	0.154227	0.689963	0.154227	0.689963	-0.378569	0.153213	0.22899	0.609538	0.22899	0.609538	0.0473082	0.992557	-0.473425	0.349764	-0.473425	0.349764
ZNF582	-0.782017	0.0605225	-1.4373	0.0125602	-1.4373	0.0125602	0.0847413	0.794662	0.55263	0.424242	0.55263	0.424242	0.414571	0.972727	-0.097052	0.878445	-0.097052	0.878445
ZNF593	-0.12916	0.696596	0.666226	0.130543	0.666226	0.130543	0.0394134	0.87249	0.735877	0.0797625	0.735877	0.0797625	0.272033	0.972727	-0.341468	0.533431	-0.341468	0.533431
ZNF688	-0.747923	0.0405186	-0.153574	0.742971	-0.153574	0.742971	0.157577	0.738017	1.86606	0.0343196	1.86606	0.0343196	0.387811	0.972727	-0.278489	0.626414	-0.278489	0.626414
ZNF691	-1.20119	0.00262004	-0.528344	0.16639	-0.528344	0.16639	-0.366096	0.0779353	0.00433679	0.991842	0.00433679	0.991842	0.327206	0.972727	-0.251849	0.599338	-0.251849	0.599338
ZNF746	-0.417139	0.114028	-0.547288	0.140885	-0.547288	0.140885	-0.20816	0.400766	0.452287	0.271446	0.452287	0.271446	0.0176702	0.99545	0.0459733	0.922394	0.0459733	0.922394
ZNF747	0.557656	0.063812	1.62594	0.00593267	1.62594	0.00593267	-0.371815	0.120755	-0.013665	0.973283	-0.013665	0.973283	0.112735	0.981228	-0.266694	0.656278	-0.266694	0.656278
ZNHIT1	0.14728	0.652489	0.651875	0.159921	0.651875	0.159921	-0.336331	0.122187	0.520768	0.169271	0.520768	0.169271	0.223593	0.972727	-0.267981	0.645682	-0.267981	0.645682
ZNRD1	-0.878117	0.0164612	-0.0644653	0.883538	-0.0644653	0.883538	NA	NA	NA	NA	NA	NA	-0.0615108	0.992554	-0.446937	0.407949	-0.446937	0.407949
ZP3	-0.0853276	0.853655	2.09555	0.0123679	2.09555	0.0123679	NA	NA	NA	NA	NA	NA	-0.820495	0.972727	-0.611469	0.498721	-0.611469	0.498721
ZXDA	0.407412	0.101308	-1.45	0.00355101	-1.45	0.00355101	0.448948	0.194897	-0.337864	0.380744	-0.337864	0.380744	-0.346431	0.972727	1.06252	0.158354	1.06252	0.158354
ZXDC	-0.687396	0.0210682	-0.596445	0.1073	-0.596445	0.1073	-0.465326	0.0409359	-0.425857	0.311758	-0.425857	0.311758	0.105989	0.979452	0.104683	0.820343	0.104683	0.820343
ZYX	0.0819493	0.742314	0.736567	0.0757805	0.736567	0.0757805	0.0971712	0.768016	0.24238	0.634364	0.24238	0.634364	0.219793	0.972727	-0.475802	0.367673	-0.475802	0.367673
