# Supplementary material for: Translatome analysis of Tuberous Sclerosis Complex-1 patient-derived neural progenitor cells reveal rapamycin-dependent and independent alterations
Source: Research Square preprint supplement (doi:10.21203/rs.3.rs-2702044/v1), 2023-03-27
Supplement: Supplementary file 2 [file 95da64966862261c8c90a719.xlsx]

## Sheet: Table S1a. NullvsWT Tr.Up. 
TSC1-/- vs TSC1+/+ Translation Up
Characteristics of the Network
p-val cutoff : 0.001
Correction Meth. : Benjamini-Hochberg
Kappa Score Threshold: 0.4
Grouped by Kappa Statistics
Statistical Test Useed: Enrichment (Right-sided hypergeometric test)
Min GO Level : 7 , Max GO Level : 15 (default)
Number of genes : 3 (default)
Min. Percentage: 10 (default)
Organism Analyzed:Homo Sapiens
Ontology Used: GO_BiologicalProcess-EBI-UniProt-GOA-ACAP-ARAP_13.05.2021_00h00 KEGG_13.05.2021 REACTOME_Reactions_13.05.2021
Characteristics of the Gene Lists
Reference Set Consists of 11998 genes
Consists of 1354 genes of which 1344 were recognized by ClueGO.
1166 out of 189 genes (86.76%) functionally annotated in any selected ontology
Term ID	Term	Ontology Source	Term PValue Corrected with Benjamini-Hochberg	Group PValue Corrected with Benjamini-Hochberg	GOGroups	% Associated Genes	Nr. Genes	Associated Genes Found
GO:0034340	response to type I interferon	GO_BiologicalProcess-EBI-UniProt-GOA-ACAP-ARAP_13.05.2021_00h00	0.000833381	8.80332e-05	Group0	27.419355	17	[HLA-B, HLA-C, HLA-E, HLA-H, IFI27, IFI35, IFITM1, IRAK1, IRF3, IRF9, ISG15, ISG20, NLRC5, SHFL, SMPD1, TREX1, TYK2]
R-HSA:8951499	Loading of antigenic peptides on to class I MHC	REACTOME_Reactions_13.05.2021	0.000390101	3.36256e-05	Group1	63.636364	7	[BCAP31, CALR, HLA-B, HLA-C, HLA-E, TAP1, TAPBP]
R-HSA:983142	Formation of peptide loading complex (PLC)	REACTOME_Reactions_13.05.2021	0.000390101	3.36256e-05	Group1	63.636364	7	[BCAP31, CALR, HLA-B, HLA-C, HLA-E, TAP1, TAPBP]
R-HSA:983161	Dissociation of the Antigenic peptide:MHC:B2M peptide loading complex	REACTOME_Reactions_13.05.2021	0.000390101	3.36256e-05	Group1	63.636364	7	[BCAP31, CALR, HLA-B, HLA-C, HLA-E, TAP1, TAPBP]
GO:0043299	leukocyte degranulation	GO_BiologicalProcess-EBI-UniProt-GOA-ACAP-ARAP_13.05.2021_00h00	6.27259e-06	5.10404e-06	Group2	18.556702	72	[A1BG, ADGRE5, AGPAT2, AIFM2, ALDOA, ARHGAP9, ARSA, ATAD3B, ATG7, BRI3, CD68, CFP, CLU, CNN2, CRACR2A, CST3, CSTB, CTSA, CTSD, CYBA, DYNLT1, FTH1, FTL, GALNS, GLA, GLB1, GPI, GSN, GSTP1, GUSB, HLA-B, HLA-C, HLA-H, HMOX1, IL4R, LAMTOR1, LAMTOR2, LAT, MIF, NAPRT, NBEAL2, NDUFA2, ORMDL3, PADI2, PGAM1, PGAM4, PKM, PLA2G3, PLAUR, PRDX6, PSMD13, PYGB, QSOX1, RAB3A, RHOF, RHOG, RNASET2, S100A13, SERPINA…
GO:0045055	regulated exocytosis	GO_BiologicalProcess-EBI-UniProt-GOA-ACAP-ARAP_13.05.2021_00h00	6.93921e-05	5.10404e-06	Group2	15.743944	91	[A1BG, ADGRE5, AGPAT2, AIFM2, ALDOA, ARHGAP9, ARSA, ATAD3B, ATG7, BAIAP3, BRI3, CD68, CDK5, CDK5R2, CFP, CLEC3B, CLU, CNN2, CRACR2A, CST3, CSTB, CTSA, CTSD, CYBA, DMTN, DYNLT1, ECM1, FERMT3, FTH1, FTL, GALNS, GLA, GLB1, GPI, GSN, GSTP1, GTPBP2, GUSB, HLA-B, HLA-C, HLA-H, HMOX1, IL4R, LAMTOR1, LAMTOR2, LAT, LGALS3BP, MAGED2, MICAL1, MIF, NAPRT, NBEAL2, NDUFA2, ORMDL3, PADI2, PGAM1, PGAM4, PIP5K1C,…
GO:0002283	neutrophil activation involved in immune response	GO_BiologicalProcess-EBI-UniProt-GOA-ACAP-ARAP_13.05.2021_00h00	9.98211e-06	5.10404e-06	Group2	18.539326	66	[A1BG, ADGRE5, AGPAT2, AIFM2, ALDOA, ARHGAP9, ARSA, ATAD3B, ATG7, BRI3, CD68, CFP, CLU, CNN2, CRACR2A, CST3, CSTB, CTSA, CTSD, CYBA, DYNLT1, FTH1, FTL, GALNS, GLA, GLB1, GPI, GSN, GSTP1, GUSB, HLA-B, HLA-C, HLA-H, LAMTOR1, LAMTOR2, MIF, NAPRT, NBEAL2, NDUFA2, ORMDL3, PADI2, PGAM1, PGAM4, PKM, PLAUR, PRDX6, PSMD13, PYGB, QSOX1, RAB3A, RHOF, RHOG, RNASET2, SERPINA1, SERPINB6, STK10, STK11IP, TCIRG1…
GO:0043312	neutrophil degranulation	GO_BiologicalProcess-EBI-UniProt-GOA-ACAP-ARAP_13.05.2021_00h00	9.63412e-06	5.10404e-06	Group2	18.644068	66	[A1BG, ADGRE5, AGPAT2, AIFM2, ALDOA, ARHGAP9, ARSA, ATAD3B, ATG7, BRI3, CD68, CFP, CLU, CNN2, CRACR2A, CST3, CSTB, CTSA, CTSD, CYBA, DYNLT1, FTH1, FTL, GALNS, GLA, GLB1, GPI, GSN, GSTP1, GUSB, HLA-B, HLA-C, HLA-H, LAMTOR1, LAMTOR2, MIF, NAPRT, NBEAL2, NDUFA2, ORMDL3, PADI2, PGAM1, PGAM4, PKM, PLAUR, PRDX6, PSMD13, PYGB, QSOX1, RAB3A, RHOF, RHOG, RNASET2, SERPINA1, SERPINB6, STK10, STK11IP, TCIRG1…
KEGG:00190	Oxidative phosphorylation	KEGG_13.05.2021	4.76973e-07	3.03594e-10	Group3	31.132076	33	[ATP5F1D, ATP5ME, ATP6V0B, ATP6V0D1, ATP6V0E1, ATP6V0E2, ATP6V1F, COX4I1, COX5B, COX6A1, COX6B1, COX7A2, COX8A, CYC1, NDUFA11, NDUFA13, NDUFA2, NDUFA3, NDUFA9, NDUFB1, NDUFB10, NDUFB7, NDUFB8, NDUFB9, NDUFS7, NDUFS8, SDHA, TCIRG1, UQCR10, UQCR11, UQCRC1, UQCRFS1, UQCRQ]
GO:0022853	active ion transmembrane transporter activity	GO_BiologicalProcess-EBI-UniProt-GOA-ACAP-ARAP_13.05.2021_00h00	0.000762657	3.03594e-10	Group3	20.394737	31	[ATP13A1, ATP2A1, ATP2A3, ATP6V0B, ATP6V0D1, ATP6V0E1, ATP6V0E2, ATP6V1F, BSG, CLCN7, CTNS, MFSD2A, SLC12A4, SLC13A3, SLC17A7, SLC19A1, SLC25A3, SLC25A5, SLC25A6, SLC26A11, SLC26A9, SLC3A2, SLC45A1, SLC4A11, SLC4A2, SLC6A12, SLC8B1, SLC9A5, SLC9A8, TCIRG1, TLR9]
GO:1902600	proton transmembrane transport	GO_BiologicalProcess-EBI-UniProt-GOA-ACAP-ARAP_13.05.2021_00h00	0.000391527	3.03594e-10	Group3	22.881355	27	[ANTKMT, ATP2A1, ATP2A3, ATP5F1D, ATP5ME, ATP6V0B, ATP6V0D1, ATP6V0E1, ATP6V0E2, ATP6V1F, COX4I1, COX5B, COX6A1, COX6B1, COX7A2, COX8A, CTNS, NDUFS7, SLC25A3, SLC25A5, SLC45A1, SLC4A11, SLC9A5, SLC9A8, SPHK2, SURF1, TCIRG1]
GO:0015078	proton transmembrane transporter activity	GO_BiologicalProcess-EBI-UniProt-GOA-ACAP-ARAP_13.05.2021_00h00	0.000152366	3.03594e-10	Group3	25.0	26	[ANTKMT, ATP2A1, ATP2A3, ATP5F1D, ATP5ME, ATP6V0B, ATP6V0D1, ATP6V0E1, ATP6V0E2, ATP6V1F, COX4I1, COX5B, COX6A1, COX6B1, COX7A2, COX8A, CTNS, SLC25A3, SLC25A5, SLC45A1, SLC4A11, SLC9A5, SLC9A8, SPHK2, SURF1, TCIRG1]
GO:0061621	canonical glycolysis	GO_BiologicalProcess-EBI-UniProt-GOA-ACAP-ARAP_13.05.2021_00h00	0.000412845	0.00010325	Group4	40.74074	11	[ALDOA, ENO1, ENO2, GPI, HK1, PFKP, PGAM1, PGAM2, PGAM4, PKM, TPI1]
GO:0061620	glycolytic process through glucose-6-phosphate	GO_BiologicalProcess-EBI-UniProt-GOA-ACAP-ARAP_13.05.2021_00h00	0.000730007	0.00010325	Group4	37.931034	11	[ALDOA, ENO1, ENO2, GPI, HK1, PFKP, PGAM1, PGAM2, PGAM4, PKM, TPI1]
GO:0006007	glucose catabolic process	GO_BiologicalProcess-EBI-UniProt-GOA-ACAP-ARAP_13.05.2021_00h00	0.000745636	0.00010325	Group4	35.294117	12	[ALDOA, BAD, ENO1, ENO2, GPI, HK1, PFKP, PGAM1, PGAM2, PGAM4, PKM, TPI1]
GO:0061718	glucose catabolic process to pyruvate	GO_BiologicalProcess-EBI-UniProt-GOA-ACAP-ARAP_13.05.2021_00h00	0.000412845	0.00010325	Group4	40.74074	11	[ALDOA, ENO1, ENO2, GPI, HK1, PFKP, PGAM1, PGAM2, PGAM4, PKM, TPI1]
GO:0061615	glycolytic process through fructose-6-phosphate	GO_BiologicalProcess-EBI-UniProt-GOA-ACAP-ARAP_13.05.2021_00h00	0.000730007	0.00010325	Group4	37.931034	11	[ALDOA, ENO1, ENO2, GPI, HK1, PFKP, PGAM1, PGAM2, PGAM4, PKM, TPI1]
R-HSA:9639286	RRAGC,D exchanges GTP for GDP	REACTOME_Reactions_13.05.2021	0.000344688	8.62256e-05	Group5	42.307693	11	[ATP6V0B, ATP6V0D1, ATP6V0E1, ATP6V0E2, ATP6V1F, LAMTOR1, LAMTOR2, LAMTOR4, LAMTOR5, RRAGA, TCIRG1]
R-HSA:9640167	RRAGA,B exchanges GDP for GTP	REACTOME_Reactions_13.05.2021	0.000558509	8.62256e-05	Group5	39.285713	11	[ATP6V0B, ATP6V0D1, ATP6V0E1, ATP6V0E2, ATP6V1F, LAMTOR1, LAMTOR2, LAMTOR4, LAMTOR5, RRAGA, TCIRG1]
R-HSA:9640168	v-ATPase:Ragulator:RRAGA,B:GTP:RRAGC,D:GDP:SLC38A9:Arginine dissociates yielding v-ATPase:Ragulator:RRAGA,B:GTP:RRAGC,D:GDP and SLC38A9:Arginine	REACTOME_Reactions_13.05.2021	0.000412845	8.62256e-05	Group5	40.74074	11	[ATP6V0B, ATP6V0D1, ATP6V0E1, ATP6V0E2, ATP6V1F, LAMTOR1, LAMTOR2, LAMTOR4, LAMTOR5, RRAGA, TCIRG1]
R-HSA:9640175	v-ATPase:Ragulator:RagA,B:GDP:RagC,D:GDP binds SLC38A9:Arginine	REACTOME_Reactions_13.05.2021	0.000412845	8.62256e-05	Group5	40.74074	11	[ATP6V0B, ATP6V0D1, ATP6V0E1, ATP6V0E2, ATP6V1F, LAMTOR1, LAMTOR2, LAMTOR4, LAMTOR5, RRAGA, TCIRG1]
R-HSA:9645598	RRAGC,D hydrolyzes GTP	REACTOME_Reactions_13.05.2021	0.000214261	8.62256e-05	Group5	41.37931	12	[ATP6V0B, ATP6V0D1, ATP6V0E1, ATP6V0E2, ATP6V1F, FLCN, LAMTOR1, LAMTOR2, LAMTOR4, LAMTOR5, RRAGA, TCIRG1]
R-HSA:9645608	v-ATPase:Ragulator:RRAGA,B:GTP:RRAGC,D:GDP binds mTORC1	REACTOME_Reactions_13.05.2021	0.000730007	8.62256e-05	Group5	37.931034	11	[ATP6V0B, ATP6V0D1, ATP6V0E1, ATP6V0E2, ATP6V1F, LAMTOR1, LAMTOR2, LAMTOR4, LAMTOR5, RRAGA, TCIRG1]
R-HSA:9646468	mTORC1 binds RHEB:GTP	REACTOME_Reactions_13.05.2021	0.000910458	8.62256e-05	Group5	36.666668	11	[ATP6V0B, ATP6V0D1, ATP6V0E1, ATP6V0E2, ATP6V1F, LAMTOR1, LAMTOR2, LAMTOR4, LAMTOR5, RRAGA, TCIRG1]
KEGG:00190	Oxidative phosphorylation	KEGG_13.05.2021	4.76973e-07	3.74659e-08	Group6	31.132076	33	[ATP5F1D, ATP5ME, ATP6V0B, ATP6V0D1, ATP6V0E1, ATP6V0E2, ATP6V1F, COX4I1, COX5B, COX6A1, COX6B1, COX7A2, COX8A, CYC1, NDUFA11, NDUFA13, NDUFA2, NDUFA3, NDUFA9, NDUFB1, NDUFB10, NDUFB7, NDUFB8, NDUFB9, NDUFS7, NDUFS8, SDHA, TCIRG1, UQCR10, UQCR11, UQCRC1, UQCRFS1, UQCRQ]
KEGG:04260	Cardiac muscle contraction	KEGG_13.05.2021	7.89197e-06	3.74659e-08	Group6	37.5	21	[ATP2A1, ATP2A3, CACNA2D1, CACNB1, CACNG4, CACNG6, COX4I1, COX5B, COX6A1, COX6B1, COX7A2, COX8A, CYC1, MYL4, TNNC1, TPM2, UQCR10, UQCR11, UQCRC1, UQCRFS1, UQCRQ]
KEGG:04714	Thermogenesis	KEGG_13.05.2021	5.33136e-06	3.74659e-08	Group6	22.916666	44	[ACTB, ADCY2, ADCY5, AKT1S1, ATP5F1D, ATP5ME, BMP8A, COA1, COA4, COX14, COX4I1, COX5B, COX6A1, COX6B1, COX7A2, COX8A, CPT1C, CYC1, HRAS, NDUFA11, NDUFA13, NDUFA2, NDUFA3, NDUFA9, NDUFAF3, NDUFB1, NDUFB10, NDUFB7, NDUFB8, NDUFB9, NDUFS7, NDUFS8, NPPB, NPR1, RPS6KA1, RPS6KB2, SDHA, SLC25A20, SLC25A29, UQCR10, UQCR11, UQCRC1, UQCRFS1, UQCRQ]
KEGG:05010	Alzheimer disease	KEGG_13.05.2021	0.000642615	3.74659e-08	Group6	17.171717	51	[AGER, APOE, ATP2A1, ATP2A3, ATP5F1D, BAD, CDK5, COX4I1, COX5B, COX6A1, COX6B1, COX7A2, COX8A, CSF1, CYC1, FZD8, GRIN2C, GRIN2D, HRAS, NDUFA11, NDUFA13, NDUFA2, NDUFA3, NDUFA9, NDUFB1, NDUFB10, NDUFB7, NDUFB8, NDUFB9, NDUFS7, NDUFS8, PSENEN, PSMD13, PSMD8, SDHA, SLC25A5, SLC25A6, TUBA1A, TUBA1C, TUBB2A, TUBB2B, TUBB3, TUBB4A, TUBB4B, UQCR10, UQCR11, UQCRC1, UQCRFS1, UQCRQ, WNT2B, WNT4]
KEGG:05012	Parkinson disease	KEGG_13.05.2021	1.5713e-05	3.74659e-08	Group6	21.463415	44	[ADCY5, ATP5F1D, CAMK2G, COX4I1, COX5B, COX6A1, COX6B1, COX7A2, COX8A, CYC1, DUSP1, NDUFA11, NDUFA13, NDUFA2, NDUFA3, NDUFA9, NDUFB1, NDUFB10, NDUFB7, NDUFB8, NDUFB9, NDUFS7, NDUFS8, PSMD13, PSMD8, SDHA, SLC25A5, SLC25A6, TH, TRAP1, TUBA1A, TUBA1C, TUBB2A, TUBB2B, TUBB3, TUBB4A, TUBB4B, UBB, UCHL1, UQCR10, UQCR11, UQCRC1, UQCRFS1, UQCRQ]
KEGG:05020	Prion disease	KEGG_13.05.2021	2.81086e-05	3.74659e-08	Group6	20.952381	44	[ATF6B, ATP5F1D, BAD, COX4I1, COX5B, COX6A1, COX6B1, COX7A2, COX8A, CYBA, CYC1, GRIN2C, GRIN2D, GRIN3B, NDUFA11, NDUFA13, NDUFA2, NDUFA3, NDUFA9, NDUFB1, NDUFB10, NDUFB7, NDUFB8, NDUFB9, NDUFS7, NDUFS8, PSMD13, PSMD8, RYR1, SDHA, SLC25A5, SLC25A6, TUBA1A, TUBA1C, TUBB2A, TUBB2B, TUBB3, TUBB4A, TUBB4B, UQCR10, UQCR11, UQCRC1, UQCRFS1, UQCRQ]
KEGG:05415	Diabetic cardiomyopathy	KEGG_13.05.2021	5.53604e-06	3.74659e-08	Group6	24.683544	39	[AGER, AGT, ATP2A1, ATP2A3, ATP5F1D, CAMK2G, COX4I1, COX5B, COX6A1, COX6B1, COX7A2, COX8A, CTSD, CYBA, CYC1, G6PD, MMP2, NDUFA11, NDUFA13, NDUFA2, NDUFA3, NDUFA9, NDUFB1, NDUFB10, NDUFB7, NDUFB8, NDUFB9, NDUFS7, NDUFS8, NOS3, SDHA, SLC25A5, SLC25A6, SLC2A4, UQCR10, UQCR11, UQCRC1, UQCRFS1, UQCRQ]
R-HSA:6799178	Intermediate 1 binds HP subcomplex to form Intermediate 2	REACTOME_Reactions_13.05.2021	0.000129828	3.74659e-08	Group6	40.625	13	[NDUFA11, NDUFA13, NDUFA2, NDUFA3, NDUFA9, NDUFAF3, NDUFB1, NDUFB10, NDUFB7, NDUFB8, NDUFB9, NDUFS7, NDUFS8]
R-HSA:6799191	Intermediate 2 binds MT-ND1:NDUFAF5:NDUFAF6 to form a 315kDa subcomplex	REACTOME_Reactions_13.05.2021	0.000232747	3.74659e-08	Group6	38.235294	13	[NDUFA11, NDUFA13, NDUFA2, NDUFA3, NDUFA9, NDUFAF3, NDUFB1, NDUFB10, NDUFB7, NDUFB8, NDUFB9, NDUFS7, NDUFS8]
R-HSA:6799197	ND4, ND5 bind the 550kDa complex to form the 815kDa complex	REACTOME_Reactions_13.05.2021	0.0003913	3.74659e-08	Group6	34.146343	14	[COA1, NDUFA11, NDUFA13, NDUFA2, NDUFA3, NDUFA9, NDUFAF3, NDUFB1, NDUFB10, NDUFB7, NDUFB8, NDUFB9, NDUFS7, NDUFS8]
R-HSA:6799202	The 315kDa subcomplex binds the 370kDa subcomplex to form the 550kDa complex	REACTOME_Reactions_13.05.2021	0.0003913	3.74659e-08	Group6	34.146343	14	[COA1, NDUFA11, NDUFA13, NDUFA2, NDUFA3, NDUFA9, NDUFAF3, NDUFB1, NDUFB10, NDUFB7, NDUFB8, NDUFB9, NDUFS7, NDUFS8]
GO:0006119	oxidative phosphorylation	GO_BiologicalProcess-EBI-UniProt-GOA-ACAP-ARAP_13.05.2021_00h00	9.75143e-06	3.74659e-08	Group6	25.806452	32	[ANTKMT, ATP5F1D, ATP5ME, CHCHD10, COX4I1, COX5B, COX6A1, COX6B1, COX7A2, COX8A, CYC1, NDUFA11, NDUFA13, NDUFA2, NDUFA3, NDUFA9, NDUFB1, NDUFB10, NDUFB7, NDUFB8, NDUFB9, NDUFS7, NDUFS8, SDHA, SURF1, UQCC2, UQCC3, UQCR10, UQCR11, UQCRC1, UQCRFS1, UQCRQ]
GO:0019646	aerobic electron transport chain	GO_BiologicalProcess-EBI-UniProt-GOA-ACAP-ARAP_13.05.2021_00h00	7.27223e-06	3.74659e-08	Group6	32.467533	25	[COX4I1, COX5B, COX6A1, COX6B1, COX8A, CYC1, NDUFA11, NDUFA13, NDUFA2, NDUFA3, NDUFA9, NDUFB1, NDUFB10, NDUFB7, NDUFB8, NDUFB9, NDUFS7, NDUFS8, SDHA, UQCC3, UQCR10, UQCR11, UQCRC1, UQCRFS1, UQCRQ]
GO:0042773	ATP synthesis coupled electron transport	GO_BiologicalProcess-EBI-UniProt-GOA-ACAP-ARAP_13.05.2021_00h00	1.36509e-05	3.74659e-08	Group6	29.411764	25	[COX4I1, COX5B, COX6A1, COX6B1, COX8A, CYC1, NDUFA11, NDUFA13, NDUFA2, NDUFA3, NDUFA9, NDUFB1, NDUFB10, NDUFB7, NDUFB8, NDUFB9, NDUFS7, NDUFS8, SDHA, UQCC3, UQCR10, UQCR11, UQCRC1, UQCRFS1, UQCRQ]
GO:1902600	proton transmembrane transport	GO_BiologicalProcess-EBI-UniProt-GOA-ACAP-ARAP_13.05.2021_00h00	0.000391527	3.74659e-08	Group6	22.881355	27	[ANTKMT, ATP2A1, ATP2A3, ATP5F1D, ATP5ME, ATP6V0B, ATP6V0D1, ATP6V0E1, ATP6V0E2, ATP6V1F, COX4I1, COX5B, COX6A1, COX6B1, COX7A2, COX8A, CTNS, NDUFS7, SLC25A3, SLC25A5, SLC45A1, SLC4A11, SLC9A5, SLC9A8, SPHK2, SURF1, TCIRG1]
GO:0042775	mitochondrial ATP synthesis coupled electron transport	GO_BiologicalProcess-EBI-UniProt-GOA-ACAP-ARAP_13.05.2021_00h00	1.36509e-05	3.74659e-08	Group6	29.411764	25	[COX4I1, COX5B, COX6A1, COX6B1, COX8A, CYC1, NDUFA11, NDUFA13, NDUFA2, NDUFA3, NDUFA9, NDUFB1, NDUFB10, NDUFB7, NDUFB8, NDUFB9, NDUFS7, NDUFS8, SDHA, UQCC3, UQCR10, UQCR11, UQCRC1, UQCRFS1, UQCRQ]
GO:0015078	proton transmembrane transporter activity	GO_BiologicalProcess-EBI-UniProt-GOA-ACAP-ARAP_13.05.2021_00h00	0.000152366	3.74659e-08	Group6	25.0	26	[ANTKMT, ATP2A1, ATP2A3, ATP5F1D, ATP5ME, ATP6V0B, ATP6V0D1, ATP6V0E1, ATP6V0E2, ATP6V1F, COX4I1, COX5B, COX6A1, COX6B1, COX7A2, COX8A, CTNS, SLC25A3, SLC25A5, SLC45A1, SLC4A11, SLC9A5, SLC9A8, SPHK2, SURF1, TCIRG1]
GO:0007204	positive regulation of cytosolic calcium ion concentration	GO_BiologicalProcess-EBI-UniProt-GOA-ACAP-ARAP_13.05.2021_00h00	3.50063e-05	4.82886e-09	Group7	21.910112	39	[ADCY5, ADRA1B, AGT, APLNR, BCAP31, CACNA2D1, CAPN3, CCR10, CCR7, CDK5, CLU, CX3CL1, CYBA, EDN2, F2, FIS1, GALR2, GIPR, GNG3, GRIN2C, GRIN2D, GSTO1, HTT, LIME1, MCOLN1, NMB, NTSR1, OPRL1, OXTR, P2RX3, P2RY6, PKD1, RYR1, SLC8B1, TGM2, TPCN1, TPCN2, TRPM4, TRPV4]
GO:0008324	cation transmembrane transporter activity	GO_BiologicalProcess-EBI-UniProt-GOA-ACAP-ARAP_13.05.2021_00h00	8.96491e-06	4.82886e-09	Group7	16.637169	94	[AMBP, ANTKMT, ANXA6, ARC, ATP13A1, ATP2A1, ATP2A3, ATP5F1D, ATP5ME, ATP6V0B, ATP6V0D1, ATP6V0E1, ATP6V0E2, ATP6V1F, CACNA2D1, CACNB1, CACNG4, CACNG6, CDK5, CLU, COX4I1, COX5B, COX6A1, COX6B1, COX7A2, COX8A, CRACR2A, CTNS, GALR2, GRIN2C, GRIN2D, GRIN3B, GSTO1, HCN3, HTT, KCNH3, KCNK12, KCNN4, MCOLN1, MFSD2A, MINK1, NTSR1, OPRL1, ORAI3, P2RX3, P2RX6, P2RY6, PIEZO1, PKD1, PKD1L2, PRRT1, RANGRF, REM…
GO:0015267	channel activity	GO_BiologicalProcess-EBI-UniProt-GOA-ACAP-ARAP_13.05.2021_00h00	0.000508708	4.82886e-09	Group7	15.925058	68	[AMBP, ANTKMT, ANXA6, AQP3, ARC, ATP5F1D, ATP5ME, BEST1, BEST4, CACNA2D1, CACNB1, CACNG4, CACNG6, CDK5, CLCN2, CLCN7, CLDN4, CLU, CRACR2A, GALR2, GRIN2C, GRIN2D, GRIN3B, GSTO1, HCN3, HTT, KCNH3, KCNK12, KCNN4, LRRC8E, MCOLN1, MINK1, NTSR1, OPRL1, ORAI3, P2RX3, P2RX6, P2RY6, PIEZO1, PKD1, PKD1L2, PRRT1, RANGRF, REM2, RGS9BP, RRAD, RYR1, SCN4A, SCN4B, SCNN1A, SHISA8, SLC1A4, SLC26A9, SLC4A11, STIM1…
GO:0030003	cellular cation homeostasis	GO_BiologicalProcess-EBI-UniProt-GOA-ACAP-ARAP_13.05.2021_00h00	0.000802797	4.82886e-09	Group7	15.714286	66	[ADCY5, ADRA1B, AGT, ANKRD9, ANXA6, APLNR, APOE, ATOX1, ATP13A1, ATP2A1, ATP2A3, ATP6V0B, ATP6V0D1, ATP6V0E1, ATP6V0E2, ATP6V1F, BCAP31, CACNA2D1, CALR, CAPN3, CCR10, CCR7, CDK5, CLU, CX3CL1, CYBA, EDN2, F2, FIS1, FTH1, FTL, GALR2, GIPR, GNG3, GRIN2C, GRIN2D, GSTO1, HMOX1, HTT, LIME1, MCOLN1, MTLN, NEDD8, NMB, NTSR1, OPRL1, OXTR, P2RX3, P2RY6, PKD1, RAB20, RYR1, SCO2, SLC4A11, SLC4A2, SLC8B1, SLC…
GO:0098662	inorganic cation transmembrane transport	GO_BiologicalProcess-EBI-UniProt-GOA-ACAP-ARAP_13.05.2021_00h00	8.52253e-06	4.82886e-09	Group7	16.756756	93	[ABCB8, AMBP, ANTKMT, ANXA6, APLNR, ATOX1, ATP2A1, ATP2A3, ATP5F1D, ATP5ME, ATP6V0B, ATP6V0D1, ATP6V0E1, ATP6V0E2, ATP6V1F, BIN1, CACNA2D1, CACNB1, CACNG4, CACNG6, CAPN3, CCR7, CDK5, CLU, COX4I1, COX5B, COX6A1, COX6B1, COX7A2, COX8A, CRACR2A, CTNS, CX3CL1, CYBA, F2, G6PD, GALR2, GRIN2C, GRIN2D, GRIN3B, GSTO1, HCN3, HTT, KCNH3, KCNK12, KCNN4, LIME1, MCOLN1, MFSD2A, NDUFS7, NTSR1, OPRL1, ORAI3, P2R…
GO:0005216	ion channel activity	GO_BiologicalProcess-EBI-UniProt-GOA-ACAP-ARAP_13.05.2021_00h00	0.000403611	4.82886e-09	Group7	16.216217	66	[AMBP, ANTKMT, ANXA6, ARC, ATP5F1D, ATP5ME, BEST1, BEST4, CACNA2D1, CACNB1, CACNG4, CACNG6, CDK5, CLCN2, CLCN7, CLDN4, CLU, CRACR2A, GALR2, GRIN2C, GRIN2D, GRIN3B, GSTO1, HCN3, HTT, KCNH3, KCNK12, KCNN4, LRRC8E, MCOLN1, MINK1, NTSR1, OPRL1, ORAI3, P2RX3, P2RX6, P2RY6, PIEZO1, PKD1, PKD1L2, PRRT1, RANGRF, REM2, RGS9BP, RRAD, RYR1, SCN4A, SCN4B, SCNN1A, SHISA8, SLC1A4, SLC26A9, SLC4A11, STIM1, STIM…
GO:0022890	inorganic cation transmembrane transporter activity	GO_BiologicalProcess-EBI-UniProt-GOA-ACAP-ARAP_13.05.2021_00h00	1.93391e-05	4.82886e-09	Group7	16.50854	87	[AMBP, ANTKMT, ANXA6, ARC, ATP13A1, ATP2A1, ATP2A3, ATP5F1D, ATP5ME, ATP6V0B, ATP6V0D1, ATP6V0E1, ATP6V0E2, ATP6V1F, CACNA2D1, CACNB1, CACNG4, CACNG6, CDK5, CLU, COX4I1, COX5B, COX6A1, COX6B1, COX7A2, COX8A, CRACR2A, CTNS, GALR2, GRIN2C, GRIN2D, GRIN3B, GSTO1, HCN3, HTT, KCNH3, KCNK12, KCNN4, MCOLN1, MFSD2A, MINK1, NTSR1, OPRL1, ORAI3, P2RX3, P2RX6, P2RY6, PIEZO1, PKD1, PKD1L2, PRRT1, RANGRF, REM…
GO:0006816	calcium ion transport	GO_BiologicalProcess-EBI-UniProt-GOA-ACAP-ARAP_13.05.2021_00h00	8.36012e-06	4.82886e-09	Group7	19.60133	59	[AGT, AMBP, ANXA6, APLNR, ATP2A1, ATP2A3, BEST1, BIN1, CACNA2D1, CACNB1, CACNG4, CACNG6, CAMK2G, CAPN3, CCR7, CD4, CDK5, CLU, CRACR2A, CRACR2B, CX3CL1, CYBA, F2, G6PD, GRIN2C, GRIN2D, GRIN3B, GSTO1, HTT, KCNN4, LIME1, MCOLN1, NTSR1, OPRL1, ORAI3, P2RX3, P2RY6, PDGFRB, PKD1, PKD1L2, PMPCA, RAMP1, REM2, RGS9BP, RRAD, RYR1, SLC3A2, SLC8B1, SMDT1, SPHK2, STIM1, STIMATE, STX1A, TLR9, TMEM37, TPCN1, TP…
GO:0051924	regulation of calcium ion transport	GO_BiologicalProcess-EBI-UniProt-GOA-ACAP-ARAP_13.05.2021_00h00	0.000637469	4.82886e-09	Group7	19.883041	34	[AGT, APLNR, ATP2A1, BEST1, BIN1, CACNA2D1, CACNB1, CACNG6, CAMK2G, CAPN3, CD4, CDK5, CRACR2A, CRACR2B, CX3CL1, CYBA, F2, G6PD, GRIN3B, GSTO1, HTT, LIME1, NTSR1, OPRL1, P2RX3, P2RY6, PDGFRB, RGS9BP, RRAD, SLC8B1, SPHK2, STIM1, STIMATE, TLR9]
GO:0070588	calcium ion transmembrane transport	GO_BiologicalProcess-EBI-UniProt-GOA-ACAP-ARAP_13.05.2021_00h00	1.037e-05	4.82886e-09	Group7	20.94017	49	[AMBP, ANXA6, APLNR, ATP2A1, ATP2A3, BIN1, CACNA2D1, CACNB1, CACNG4, CACNG6, CAPN3, CCR7, CDK5, CLU, CRACR2A, CX3CL1, CYBA, F2, G6PD, GRIN2C, GRIN2D, GRIN3B, GSTO1, HTT, LIME1, MCOLN1, NTSR1, OPRL1, ORAI3, P2RY6, PKD1, PKD1L2, PMPCA, REM2, RGS9BP, RRAD, RYR1, SLC3A2, SLC8B1, SMDT1, STIM1, STIMATE, STX1A, TLR9, TMEM37, TPCN1, TPCN2, TRPM4, TRPV4]
GO:0072503	cellular divalent inorganic cation homeostasis	GO_BiologicalProcess-EBI-UniProt-GOA-ACAP-ARAP_13.05.2021_00h00	0.000824768	4.82886e-09	Group7	17.132868	49	[ADCY5, ADRA1B, AGT, ANXA6, APLNR, APOE, ATP13A1, ATP2A1, ATP2A3, BCAP31, CACNA2D1, CALR, CAPN3, CCR10, CCR7, CDK5, CLU, CX3CL1, CYBA, EDN2, F2, FIS1, GALR2, GIPR, GNG3, GRIN2C, GRIN2D, GSTO1, HTT, LIME1, MCOLN1, MTLN, NMB, NTSR1, OPRL1, OXTR, P2RX3, P2RY6, PKD1, RYR1, SLC8B1, SMDT1, STIM1, TCIRG1, TGM2, TPCN1, TPCN2, TRPM4, TRPV4]
GO:0005261	cation channel activity	GO_BiologicalProcess-EBI-UniProt-GOA-ACAP-ARAP_13.05.2021_00h00	0.000927051	4.82886e-09	Group7	16.32653	56	[AMBP, ANTKMT, ANXA6, ARC, ATP5F1D, ATP5ME, CACNA2D1, CACNB1, CACNG4, CACNG6, CDK5, CLU, CRACR2A, GALR2, GRIN2C, GRIN2D, GRIN3B, GSTO1, HCN3, HTT, KCNH3, KCNK12, KCNN4, MCOLN1, MINK1, NTSR1, OPRL1, ORAI3, P2RX3, P2RX6, P2RY6, PIEZO1, PKD1, PKD1L2, PRRT1, RANGRF, REM2, RGS9BP, RRAD, RYR1, SCN4A, SCN4B, SCNN1A, SHISA8, SLC4A11, STIM1, STIMATE, STX1A, TMEM37, TMEM63A, TMEM63C, TPCN1, TPCN2, TRPM4, T…
GO:1904427	positive regulation of calcium ion transmembrane transport	GO_BiologicalProcess-EBI-UniProt-GOA-ACAP-ARAP_13.05.2021_00h00	0.000912276	4.82886e-09	Group7	29.411764	15	[APLNR, ATP2A1, CACNA2D1, CAPN3, CDK5, CRACR2A, CX3CL1, F2, G6PD, GSTO1, HTT, NTSR1, P2RY6, STIM1, STIMATE]
GO:0006874	cellular calcium ion homeostasis	GO_BiologicalProcess-EBI-UniProt-GOA-ACAP-ARAP_13.05.2021_00h00	0.000230486	4.82886e-09	Group7	18.35206	49	[ADCY5, ADRA1B, AGT, ANXA6, APLNR, APOE, ATP13A1, ATP2A1, ATP2A3, BCAP31, CACNA2D1, CALR, CAPN3, CCR10, CCR7, CDK5, CLU, CX3CL1, CYBA, EDN2, F2, FIS1, GALR2, GIPR, GNG3, GRIN2C, GRIN2D, GSTO1, HTT, LIME1, MCOLN1, MTLN, NMB, NTSR1, OPRL1, OXTR, P2RX3, P2RY6, PKD1, RYR1, SLC8B1, SMDT1, STIM1, TCIRG1, TGM2, TPCN1, TPCN2, TRPM4, TRPV4]
GO:0055074	calcium ion homeostasis	GO_BiologicalProcess-EBI-UniProt-GOA-ACAP-ARAP_13.05.2021_00h00	0.00037362	4.82886e-09	Group7	17.948717	49	[ADCY5, ADRA1B, AGT, ANXA6, APLNR, APOE, ATP13A1, ATP2A1, ATP2A3, BCAP31, CACNA2D1, CALR, CAPN3, CCR10, CCR7, CDK5, CLU, CX3CL1, CYBA, EDN2, F2, FIS1, GALR2, GIPR, GNG3, GRIN2C, GRIN2D, GSTO1, HTT, LIME1, MCOLN1, MTLN, NMB, NTSR1, OPRL1, OXTR, P2RX3, P2RY6, PKD1, RYR1, SLC8B1, SMDT1, STIM1, TCIRG1, TGM2, TPCN1, TPCN2, TRPM4, TRPV4]
GO:0015085	calcium ion transmembrane transporter activity	GO_BiologicalProcess-EBI-UniProt-GOA-ACAP-ARAP_13.05.2021_00h00	5.2139e-05	4.82886e-09	Group7	22.360249	36	[AMBP, ANXA6, ATP2A1, ATP2A3, CACNA2D1, CACNB1, CACNG4, CACNG6, CDK5, CLU, CRACR2A, GRIN2C, GRIN2D, GRIN3B, GSTO1, HTT, MCOLN1, OPRL1, ORAI3, P2RY6, PKD1, PKD1L2, REM2, RRAD, RYR1, SLC3A2, SLC8B1, STIM1, STIMATE, STX1A, TLR9, TMEM37, TPCN1, TPCN2, TRPM4, TRPV4]
GO:0005262	calcium channel activity	GO_BiologicalProcess-EBI-UniProt-GOA-ACAP-ARAP_13.05.2021_00h00	0.000206906	4.82886e-09	Group7	22.463768	31	[AMBP, ANXA6, CACNA2D1, CACNB1, CACNG4, CACNG6, CDK5, CLU, CRACR2A, GRIN2C, GRIN2D, GRIN3B, GSTO1, HTT, MCOLN1, OPRL1, ORAI3, P2RY6, PKD1, PKD1L2, REM2, RRAD, RYR1, STIM1, STIMATE, STX1A, TMEM37, TPCN1, TPCN2, TRPM4, TRPV4]
GO:0051480	regulation of cytosolic calcium ion concentration	GO_BiologicalProcess-EBI-UniProt-GOA-ACAP-ARAP_13.05.2021_00h00	0.000359914	4.82886e-09	Group7	19.59799	39	[ADCY5, ADRA1B, AGT, APLNR, BCAP31, CACNA2D1, CAPN3, CCR10, CCR7, CDK5, CLU, CX3CL1, CYBA, EDN2, F2, FIS1, GALR2, GIPR, GNG3, GRIN2C, GRIN2D, GSTO1, HTT, LIME1, MCOLN1, NMB, NTSR1, OPRL1, OXTR, P2RX3, P2RY6, PKD1, RYR1, SLC8B1, TGM2, TPCN1, TPCN2, TRPM4, TRPV4]
KEGG:04145	Phagosome	KEGG_13.05.2021	0.00062996	0.000241804	Group8	24.444445	22	[ACTB, ATP6V0B, ATP6V0D1, ATP6V0E1, ATP6V0E2, ATP6V1F, CALR, CYBA, HLA-B, HLA-C, HLA-E, ITGA5, TAP1, TCIRG1, THBS3, TUBA1A, TUBA1C, TUBB2A, TUBB2B, TUBB3, TUBB4A, TUBB4B]
R-HSA:190520	Association of Golgi transport vesicles with microtubules	REACTOME_Reactions_13.05.2021	0.000390101	0.000241804	Group8	63.636364	7	[TUBA1A, TUBA1C, TUBB2A, TUBB2B, TUBB3, TUBB4A, TUBB4B]
R-HSA:190877	Insertion of connexons into the plasma membrane resulting in the formation of hemi-channels	REACTOME_Reactions_13.05.2021	0.000390101	0.000241804	Group8	63.636364	7	[TUBA1A, TUBA1C, TUBB2A, TUBB2B, TUBB3, TUBB4A, TUBB4B]
R-HSA:191737	Docking of connexons into junctional, double-membrane spanning channels	REACTOME_Reactions_13.05.2021	0.000390101	0.000241804	Group8	63.636364	7	[TUBA1A, TUBA1C, TUBB2A, TUBB2B, TUBB3, TUBB4A, TUBB4B]
R-HSA:389976	Beta-tubulin:GTP:Cofactor D+alpha-tubulin:GTP:Cofactor E-> Beta-tubulin:GTP:Cofactor D:alpha-tubulin:GTP:Cofactor E	REACTOME_Reactions_13.05.2021	0.000662625	0.000241804	Group8	58.333332	7	[TUBA1A, TUBA1C, TUBB2A, TUBB2B, TUBB3, TUBB4A, TUBB4B]
R-HSA:389980	unfolded actin/tubulin associates with prefoldin	REACTOME_Reactions_13.05.2021	0.000514016	0.000241804	Group8	53.333332	8	[ACTB, TUBA1A, TUBA1C, TUBB2A, TUBB2B, TUBB3, TUBB4A, TUBB4B]
R-HSA:5610733	KIF7 is recruited to the ciliary tip through interaction with axonemal microtubules	REACTOME_Reactions_13.05.2021	0.000210664	0.000241804	Group8	70.0	7	[TUBA1A, TUBA1C, TUBB2A, TUBB2B, TUBB3, TUBB4A, TUBB4B]
R-HSA:5618328	ATAT acetylates microtubules	REACTOME_Reactions_13.05.2021	0.000390101	0.000241804	Group8	63.636364	7	[TUBA1A, TUBA1C, TUBB2A, TUBB2B, TUBB3, TUBB4A, TUBB4B]
R-HSA:5618331	HDAC6 deacetylates microtubules	REACTOME_Reactions_13.05.2021	0.000390101	0.000241804	Group8	63.636364	7	[TUBA1A, TUBA1C, TUBB2A, TUBB2B, TUBB3, TUBB4A, TUBB4B]
R-HSA:8852280	GTSE1 binds microtubule lattice in interphase cells	REACTOME_Reactions_13.05.2021	0.000390101	0.000241804	Group8	63.636364	7	[TUBA1A, TUBA1C, TUBB2A, TUBB2B, TUBB3, TUBB4A, TUBB4B]
R-HSA:8852298	GTSE1 binds MAPRE1 (EB1) at microtubule plus ends	REACTOME_Reactions_13.05.2021	0.000662625	0.000241804	Group8	58.333332	7	[TUBA1A, TUBA1C, TUBB2A, TUBB2B, TUBB3, TUBB4A, TUBB4B]
R-HSA:8867370	TTLL3, TTLL8, TTLL10 polyglycylate tubulin	REACTOME_Reactions_13.05.2021	0.000390101	0.000241804	Group8	63.636364	7	[TUBA1A, TUBA1C, TUBB2A, TUBB2B, TUBB3, TUBB4A, TUBB4B]
R-HSA:8955706	TTL ligates L-Tyr to the carboxy terminus of detyr-alpha tubulin:beta tubulin	REACTOME_Reactions_13.05.2021	0.000210664	0.000241804	Group8	70.0	7	[TUBA1A, TUBA1C, TUBB2A, TUBB2B, TUBB3, TUBB4A, TUBB4B]
R-HSA:8955712	SVBP:VASH1,VASH2 hydrolyzes the terminal L-Tyr residue from alphaY-beta tubulin dimer	REACTOME_Reactions_13.05.2021	0.000662625	0.000241804	Group8	58.333332	7	[TUBA1A, TUBA1C, TUBB2A, TUBB2B, TUBB3, TUBB4A, TUBB4B]
R-HSA:9610408	GluN1:GluN2B (GRIN1:GRIN2B) di-heterotetramers bind LIN7:CASK:APBA1, DLG1 and KIF17	REACTOME_Reactions_13.05.2021	0.000511737	0.000241804	Group8	47.36842	9	[KIF17, LIN7B, TUBA1A, TUBA1C, TUBB2A, TUBB2B, TUBB3, TUBB4A, TUBB4B]
R-HSA:9610627	KIF17 transports GluN1:GluN2B (GRIN1:GRIN2B) NMDA receptors to the plasma membrane	REACTOME_Reactions_13.05.2021	0.000511737	0.000241804	Group8	47.36842	9	[KIF17, LIN7B, TUBA1A, TUBA1C, TUBB2A, TUBB2B, TUBB3, TUBB4A, TUBB4B]
R-HSA:9648017	EML4 binds to microtubules	REACTOME_Reactions_13.05.2021	0.000334572	0.000241804	Group8	57.142857	8	[NEK6, TUBA1A, TUBA1C, TUBB2A, TUBB2B, TUBB3, TUBB4A, TUBB4B]
R-NUL:8867463	Ccps deglutamylate tubulin	REACTOME_Reactions_13.05.2021	0.000210664	0.000241804	Group8	70.0	7	[TUBA1A, TUBA1C, TUBB2A, TUBB2B, TUBB3, TUBB4A, TUBB4B]
R-NUL:8955873	Polyglutamylase complex (Ttll1) polyglutamylates alpha subunits of tubulin	REACTOME_Reactions_13.05.2021	0.000210664	0.000241804	Group8	70.0	7	[TUBA1A, TUBA1C, TUBB2A, TUBB2B, TUBB3, TUBB4A, TUBB4B]

## Sheet: Table S1b. NullvsWT Tr.Down
TSC1-/- vs TSC1+/+ Translation Down
Characteristics of the Network
p-val cutoff : 0.001
Correction Meth. : Benjamini-Hochberg
Kappa Score Threshold: 0.4
Grouped by Kappa Statistics
Statistical Test Useed: Enrichment (Right-sided hypergeometric test)
Min GO Level : 7 , Max GO Level : 15 (default)
Number of genes : 3 (default)
Min. Percentage: 10 (default)
Organism Analyzed:Homo Sapiens
Ontology Used: GO_BiologicalProcess-EBI-UniProt-GOA-ACAP-ARAP_13.05.2021_00h00 KEGG_13.05.2021 REACTOME_Reactions_13.05.2021
Characteristics of the Gene Lists
Reference Set Consists of 11998 genes
Consists of 2525 genes of which 2511 were recognized by ClueGO.
2134 out of 2511 genes (84.99%) functionally annotated in any selected ontology
Term ID	Term	Ontology Source	Term PValue Corrected with Benjamini-Hochberg	Group PValue Corrected with Benjamini-Hochberg	GOGroups	% Associated Genes	Nr. Genes	Associated Genes Found
GO:0019783	ubiquitin-like protein-specific protease activity	GO_BiologicalProcess-EBI-UniProt-GOA-ACAP-ARAP_13.05.2021_00h00	0.000186466	3.01782e-06	Group0	36.792454	39	[ALG13, BRCC3, COPS2, DEPDC1B, DESI2, MINDY2, MYSM1, OTUD4, OTUD6B, OTULIN, OTULINL, RNF2, SENP2, SENP5, SENP6, SENP7, STAMBPL1, SUMO1, TANK, USP1, USP12, USP13, USP15, USP16, USP22, USP24, USP25, USP27X, USP33, USP37, USP38, USP40, USP44, USP46, USP49, USP8, USPL1, YOD1, ZUP1]
GO:0001217	DNA-binding transcription repressor activity	GO_BiologicalProcess-EBI-UniProt-GOA-ACAP-ARAP_13.05.2021_00h00	3.88047e-05	7.88113e-07	Group1	30.833334	74	[AEBP2, BACH1, DACH1, E2F6, E2F8, HEY1, HIC2, IKZF5, NFATC3, NFIL3, NR1D2, PLAGL1, PRDM5, PURB, REST, SKI, SKIL, SMAD5, SP3, TCF3, TGIF1, THAP1, TRPS1, UBA2, ZBTB1, ZBTB14, ZBTB18, ZBTB21, ZBTB26, ZBTB33, ZBTB34, ZBTB37, ZBTB49, ZBTB6, ZC3H8, ZEB1, ZEB2, ZFP37, ZFP69, ZKSCAN3, ZNF10, ZNF121, ZNF124, ZNF140, ZNF148, ZNF175, ZNF180, ZNF19, ZNF197, ZNF202, ZNF224, ZNF239, ZNF266, ZNF343, ZNF391, ZNF…
GO:0001227	DNA-binding transcription repressor activity, RNA polymerase II-specific	GO_BiologicalProcess-EBI-UniProt-GOA-ACAP-ARAP_13.05.2021_00h00	2.87557e-05	7.88113e-07	Group1	31.092438	74	[AEBP2, BACH1, DACH1, E2F6, E2F8, HEY1, HIC2, IKZF5, NFATC3, NFIL3, NR1D2, PLAGL1, PRDM5, PURB, REST, SKI, SKIL, SMAD5, SP3, TCF3, TGIF1, THAP1, TRPS1, UBA2, ZBTB1, ZBTB14, ZBTB18, ZBTB21, ZBTB26, ZBTB33, ZBTB34, ZBTB37, ZBTB49, ZBTB6, ZC3H8, ZEB1, ZEB2, ZFP37, ZFP69, ZKSCAN3, ZNF10, ZNF121, ZNF124, ZNF140, ZNF148, ZNF175, ZNF180, ZNF19, ZNF197, ZNF202, ZNF224, ZNF239, ZNF266, ZNF343, ZNF391, ZNF…
GO:0016569	covalent chromatin modification	GO_BiologicalProcess-EBI-UniProt-GOA-ACAP-ARAP_13.05.2021_00h00	0.000742594	1.01803e-05	Group2	25.91743	113	[ARID4A, ASH1L, ATF2, ATM, ATXN7, BAZ1B, BCOR, BEND3, BRCA2, BRCC3, BRMS1L, BRPF3, CDC73, CDK1, CHD1, CUL4B, DEPDC1B, DNMT3B, DPY30, DR1, DYDC2, ENY2, FMR1, GLYR1, GTF3C4, HASPIN, HDAC4, HDAC8, HDAC9, HMGA2, HUWE1, ING2, ING3, JADE3, JAK2, JMJD1C, KANSL3, KAT2B, KDM1B, KDM2A, KDM3B, KDM4D, KDM6A, KDM7A, KMT2D, KMT2E, LDB2, LRIF1, MAP3K7, MAPK8, MBIP, MEAF6, MIDEAS, MIER1, MIER3, MORF4L2, MSL1, MS…
GO:0016570	histone modification	GO_BiologicalProcess-EBI-UniProt-GOA-ACAP-ARAP_13.05.2021_00h00	0.000981779	1.01803e-05	Group2	25.882353	110	[ARID4A, ASH1L, ATF2, ATM, ATXN7, BAZ1B, BCOR, BEND3, BRCA2, BRCC3, BRMS1L, BRPF3, CDC73, CDK1, CUL4B, DEPDC1B, DNMT3B, DPY30, DR1, DYDC2, ENY2, FMR1, GLYR1, GTF3C4, HASPIN, HDAC4, HDAC8, HDAC9, HMGA2, HUWE1, ING2, ING3, JADE3, JAK2, JMJD1C, KANSL3, KAT2B, KDM1B, KDM2A, KDM3B, KDM4D, KDM6A, KDM7A, KMT2D, KMT2E, LDB2, LRIF1, MAP3K7, MAPK8, MBIP, MEAF6, MIDEAS, MIER1, MIER3, MORF4L2, MSL1, MSL3, MY…
KEGG:05168	Herpes simplex virus 1 infection	KEGG_13.05.2021	1.36391e-16	3.68311e-16	Group3	36.26943	140	[BIRC2, C5, CASP3, HCFC2, JAK2, MAP3K7, PIK3CA, PIK3R1, POU2F1, POU2F2, RBAK, RHEB, TRAF3, ZFP30, ZFP37, ZFP69, ZNF10, ZNF100, ZNF101, ZNF107, ZNF112, ZNF12, ZNF124, ZNF132, ZNF140, ZNF141, ZNF160, ZNF17, ZNF175, ZNF180, ZNF181, ZNF182, ZNF184, ZNF189, ZNF19, ZNF195, ZNF200, ZNF211, ZNF214, ZNF222, ZNF224, ZNF235, ZNF250, ZNF254, ZNF256, ZNF26, ZNF267, ZNF268, ZNF273, ZNF275, ZNF283, ZNF284, ZNF2…
R-HSA:975040	KRAB-ZNF / KAP Interaction	REACTOME_Reactions_13.05.2021	1.85134e-25	3.68311e-16	Group3	46.23656	129	[KRBOX4, ZFP30, ZFP37, ZFP69, ZKSCAN3, ZKSCAN5, ZNF10, ZNF100, ZNF101, ZNF112, ZNF12, ZNF124, ZNF138, ZNF140, ZNF141, ZNF160, ZNF17, ZNF175, ZNF18, ZNF180, ZNF184, ZNF189, ZNF19, ZNF195, ZNF197, ZNF200, ZNF202, ZNF211, ZNF214, ZNF222, ZNF224, ZNF235, ZNF250, ZNF254, ZNF256, ZNF26, ZNF264, ZNF266, ZNF267, ZNF268, ZNF273, ZNF28, ZNF286A, ZNF300, ZNF302, ZNF320, ZNF331, ZNF333, ZNF334, ZNF33A, ZNF34…
GO:0000981	DNA-binding transcription factor activity, RNA polymerase II-specific	GO_BiologicalProcess-EBI-UniProt-GOA-ACAP-ARAP_13.05.2021_00h00	2.5306e-20	3.68311e-16	Group3	30.0813	296	[ADNP, ADNP2, AEBP2, ALX1, ARNTL2, ATF1, ATF2, ATF7, ATMIN, BACH1, CARF, CDKN2AIP, CEBPG, CREB1, CREBZF, CSRNP3, DACH1, DBX2, DMRTA2, DMTF1, E2F3, E2F5, E2F6, E2F8, EBF2, ELF2, ETV1, FOXB1, FOXJ2, FOXN2, FOXN3, GABPA, GLI3, GTF2IRD2, GTF2IRD2B, HEY1, HIC2, HIVEP2, HOXA5, HOXB3, IKZF5, IRX5, KCNH8, KLF13, KLF5, KLRG1, MTF1, MYBL1, NEUROD1, NEUROD4, NFATC3, NFIL3, NFYB, NPAS2, NR1D2, NR2C2, NR6A1, …
GO:0006366	transcription by RNA polymerase II	GO_BiologicalProcess-EBI-UniProt-GOA-ACAP-ARAP_13.05.2021_00h00	2.14183e-18	3.68311e-16	Group3	25.046904	534	[ACVR2B, ADNP, ADNP2, AEBP2, AGO1, AGO4, AHI1, AKIRIN1, ALX1, ARF4, ARID4A, ARID4B, ARNTL2, ASH1L, ASXL2, ATAD2, ATAD2B, ATF1, ATF2, ATF7, ATM, ATMIN, ATXN1L, BACH1, BAZ1B, BAZ2B, BCL9, BCLAF1, BCLAF3, BCOR, BEND3, BMPR1B, BPTF, BRD2, BRMS1L, BRWD1, CARF, CBFB, CCNC, CCNT1, CCNT2, CDC73, CDK1, CDK8, CDKN2AIP, CEBPG, CEBPZ, CHD1, CHERP, COPS2, CREB1, CREBZF, CRLF3, CSRNP3, CSTF2T, CTBP2, DACH1, DB…
GO:0006357	regulation of transcription by RNA polymerase II	GO_BiologicalProcess-EBI-UniProt-GOA-ACAP-ARAP_13.05.2021_00h00	1.26852e-18	3.68311e-16	Group3	25.425425	508	[ACVR2B, ADNP, ADNP2, AEBP2, AGO1, AGO4, AHI1, AKIRIN1, ALX1, ARF4, ARID4A, ARID4B, ARNTL2, ASH1L, ASXL2, ATAD2, ATAD2B, ATF1, ATF2, ATF7, ATM, ATMIN, ATXN1L, BACH1, BAZ1B, BAZ2B, BCL9, BCLAF1, BCLAF3, BCOR, BEND3, BMPR1B, BPTF, BRD2, BRMS1L, BRWD1, CARF, CBFB, CCNC, CCNT1, CCNT2, CDC73, CDK1, CDK8, CDKN2AIP, CEBPG, CEBPZ, CHD1, CHERP, COPS2, CREB1, CREBZF, CRLF3, CSRNP3, CTBP2, DACH1, DBX2, DEK,…
GO:0140110	transcription regulator activity	GO_BiologicalProcess-EBI-UniProt-GOA-ACAP-ARAP_13.05.2021_00h00	1.77542e-16	3.68311e-16	Group3	25.637981	432	[ADCY1, ADNP, ADNP2, AEBP2, AIM2, AKIRIN1, ALK, ALX1, ARNTL2, ATF1, ATF2, ATF7, ATMIN, BACH1, BCL10, BCL9, BCLAF1, BCLAF3, BCOR, BEND6, BIRC2, BRMS1L, C1D, CARD8, CARF, CASP8AP2, CBFB, CDKN2AIP, CEBPG, CEBPZ, CHERP, CHORDC1, CNOT6, COPS2, CREB1, CREBZF, CSRNP3, CTBP2, DACH1, DBX2, DMRTA2, DMTF1, DNMT3B, DYRK1A, E2F3, E2F5, E2F6, E2F8, EAF1, EBF2, EGLN1, EID2B, ELF2, ENY2, ERBIN, ETV1, FGF13, FOXB…
GO:0003700	DNA-binding transcription factor activity	GO_BiologicalProcess-EBI-UniProt-GOA-ACAP-ARAP_13.05.2021_00h00	1.10093e-14	3.68311e-16	Group3	26.450115	342	[ADCY1, ADNP, ADNP2, AEBP2, AIM2, ALK, ALX1, ARNTL2, ATF1, ATF2, ATF7, ATMIN, BACH1, BCL10, BRMS1L, CARD8, CARF, CDKN2AIP, CEBPG, CHORDC1, CREB1, CREBZF, CSRNP3, DACH1, DBX2, DMRTA2, DMTF1, E2F3, E2F5, E2F6, E2F8, EBF2, EGLN1, ELF2, ERBIN, ETV1, FOXB1, FOXJ2, FOXN2, FOXN3, FZD1, G3BP2, GABPA, GLI3, GTF2IRD2, GTF2IRD2B, HDAC4, HEY1, HIC2, HIPK2, HIVEP2, HMGA2, HOXA5, HOXB3, IKZF5, IRX5, JAK2, KCNH…
GO:0000981	DNA-binding transcription factor activity, RNA polymerase II-specific	GO_BiologicalProcess-EBI-UniProt-GOA-ACAP-ARAP_13.05.2021_00h00	2.5306e-20	6.01973e-18	Group4	30.0813	296	[ADNP, ADNP2, AEBP2, ALX1, ARNTL2, ATF1, ATF2, ATF7, ATMIN, BACH1, CARF, CDKN2AIP, CEBPG, CREB1, CREBZF, CSRNP3, DACH1, DBX2, DMRTA2, DMTF1, E2F3, E2F5, E2F6, E2F8, EBF2, ELF2, ETV1, FOXB1, FOXJ2, FOXN2, FOXN3, GABPA, GLI3, GTF2IRD2, GTF2IRD2B, HEY1, HIC2, HIVEP2, HOXA5, HOXB3, IKZF5, IRX5, KCNH8, KLF13, KLF5, KLRG1, MTF1, MYBL1, NEUROD1, NEUROD4, NFATC3, NFIL3, NFYB, NPAS2, NR1D2, NR2C2, NR6A1, …
GO:0051252	regulation of RNA metabolic process	GO_BiologicalProcess-EBI-UniProt-GOA-ACAP-ARAP_13.05.2021_00h00	1.7304e-16	6.01973e-18	Group4	23.227549	688	[ACVR2B, ADCY1, ADNP, ADNP2, AEBP2, AGO1, AGO4, AHI1, AIM2, AKAP17A, AKIRIN1, ALK, ALX1, ANGEL2, ANKRD49, ARF4, ARHGEF11, ARID4A, ARID4B, ARNTL2, ASF1A, ASH1L, ASXL2, ATAD2, ATAD2B, ATF1, ATF2, ATF7, ATM, ATMIN, ATXN1L, AXIN2, BACH1, BAG4, BAZ1B, BAZ2B, BCL10, BCL7A, BCL9, BCLAF1, BCLAF3, BCOR, BEND3, BEND6, BIRC2, BLM, BMPR1B, BPTF, BRCA2, BRD2, BRMS1L, BRWD1, C1D, C9orf78, CAMK4, CARD8, CARF, C…
GO:0032774	RNA biosynthetic process	GO_BiologicalProcess-EBI-UniProt-GOA-ACAP-ARAP_13.05.2021_00h00	8.01397e-17	6.01973e-18	Group4	23.449478	673	[ACVR2B, ADCY1, ADNP, ADNP2, AEBP2, AGO1, AGO4, AHI1, AIM2, AKAP17A, AKIRIN1, ALK, ALX1, ANKRD49, ARF4, ARHGEF11, ARID4A, ARID4B, ARNTL2, ASF1A, ASH1L, ASXL2, ATAD2, ATAD2B, ATF1, ATF2, ATF7, ATM, ATMIN, ATXN1L, BACH1, BAZ1B, BAZ2B, BCL10, BCL7A, BCL9, BCLAF1, BCLAF3, BCOR, BDP1, BEND3, BEND6, BIRC2, BLM, BMPR1B, BPTF, BRCA2, BRD2, BRMS1L, BRWD1, C1D, CAMK4, CARD8, CARF, CASP8AP2, CBFB, CCNC, CCN…
GO:2001141	regulation of RNA biosynthetic process	GO_BiologicalProcess-EBI-UniProt-GOA-ACAP-ARAP_13.05.2021_00h00	7.93875e-17	6.01973e-18	Group4	23.68421	639	[ACVR2B, ADCY1, ADNP, ADNP2, AEBP2, AGO1, AGO4, AHI1, AIM2, AKAP17A, AKIRIN1, ALK, ALX1, ANKRD49, ARF4, ARHGEF11, ARID4A, ARID4B, ARNTL2, ASF1A, ASH1L, ASXL2, ATAD2, ATAD2B, ATF1, ATF2, ATF7, ATM, ATMIN, ATXN1L, BACH1, BAZ1B, BAZ2B, BCL10, BCL7A, BCL9, BCLAF1, BCLAF3, BCOR, BEND3, BEND6, BIRC2, BLM, BMPR1B, BPTF, BRCA2, BRD2, BRMS1L, BRWD1, C1D, CAMK4, CARD8, CARF, CASP8AP2, CBFB, CCNC, CCNT1, CC…
GO:0006351	transcription, DNA-templated	GO_BiologicalProcess-EBI-UniProt-GOA-ACAP-ARAP_13.05.2021_00h00	8.52575e-17	6.01973e-18	Group4	23.442966	670	[ACVR2B, ADCY1, ADNP, ADNP2, AEBP2, AGO1, AGO4, AHI1, AIM2, AKAP17A, AKIRIN1, ALK, ALX1, ANKRD49, ARF4, ARHGEF11, ARID4A, ARID4B, ARNTL2, ASF1A, ASH1L, ASXL2, ATAD2, ATAD2B, ATF1, ATF2, ATF7, ATM, ATMIN, ATXN1L, BACH1, BAZ1B, BAZ2B, BCL10, BCL7A, BCL9, BCLAF1, BCLAF3, BCOR, BDP1, BEND3, BEND6, BIRC2, BLM, BMPR1B, BPTF, BRCA2, BRD2, BRMS1L, BRWD1, C1D, CAMK4, CARD8, CARF, CASP8AP2, CBFB, CCNC, CCN…
GO:0097659	nucleic acid-templated transcription	GO_BiologicalProcess-EBI-UniProt-GOA-ACAP-ARAP_13.05.2021_00h00	8.42447e-17	6.01973e-18	Group4	23.434767	670	[ACVR2B, ADCY1, ADNP, ADNP2, AEBP2, AGO1, AGO4, AHI1, AIM2, AKAP17A, AKIRIN1, ALK, ALX1, ANKRD49, ARF4, ARHGEF11, ARID4A, ARID4B, ARNTL2, ASF1A, ASH1L, ASXL2, ATAD2, ATAD2B, ATF1, ATF2, ATF7, ATM, ATMIN, ATXN1L, BACH1, BAZ1B, BAZ2B, BCL10, BCL7A, BCL9, BCLAF1, BCLAF3, BCOR, BDP1, BEND3, BEND6, BIRC2, BLM, BMPR1B, BPTF, BRCA2, BRD2, BRMS1L, BRWD1, C1D, CAMK4, CARD8, CARF, CASP8AP2, CBFB, CCNC, CCN…
GO:0006355	regulation of transcription, DNA-templated	GO_BiologicalProcess-EBI-UniProt-GOA-ACAP-ARAP_13.05.2021_00h00	8.64391e-17	6.01973e-18	Group4	23.719376	639	[ACVR2B, ADCY1, ADNP, ADNP2, AEBP2, AGO1, AGO4, AHI1, AIM2, AKAP17A, AKIRIN1, ALK, ALX1, ANKRD49, ARF4, ARHGEF11, ARID4A, ARID4B, ARNTL2, ASF1A, ASH1L, ASXL2, ATAD2, ATAD2B, ATF1, ATF2, ATF7, ATM, ATMIN, ATXN1L, BACH1, BAZ1B, BAZ2B, BCL10, BCL7A, BCL9, BCLAF1, BCLAF3, BCOR, BEND3, BEND6, BIRC2, BLM, BMPR1B, BPTF, BRCA2, BRD2, BRMS1L, BRWD1, C1D, CAMK4, CARD8, CARF, CASP8AP2, CBFB, CCNC, CCNT1, CC…
GO:1903506	regulation of nucleic acid-templated transcription	GO_BiologicalProcess-EBI-UniProt-GOA-ACAP-ARAP_13.05.2021_00h00	7.93245e-17	6.01973e-18	Group4	23.710575	639	[ACVR2B, ADCY1, ADNP, ADNP2, AEBP2, AGO1, AGO4, AHI1, AIM2, AKAP17A, AKIRIN1, ALK, ALX1, ANKRD49, ARF4, ARHGEF11, ARID4A, ARID4B, ARNTL2, ASF1A, ASH1L, ASXL2, ATAD2, ATAD2B, ATF1, ATF2, ATF7, ATM, ATMIN, ATXN1L, BACH1, BAZ1B, BAZ2B, BCL10, BCL7A, BCL9, BCLAF1, BCLAF3, BCOR, BEND3, BEND6, BIRC2, BLM, BMPR1B, BPTF, BRCA2, BRD2, BRMS1L, BRWD1, C1D, CAMK4, CARD8, CARF, CASP8AP2, CBFB, CCNC, CCNT1, CC…
GO:0006366	transcription by RNA polymerase II	GO_BiologicalProcess-EBI-UniProt-GOA-ACAP-ARAP_13.05.2021_00h00	2.14183e-18	6.01973e-18	Group4	25.046904	534	[ACVR2B, ADNP, ADNP2, AEBP2, AGO1, AGO4, AHI1, AKIRIN1, ALX1, ARF4, ARID4A, ARID4B, ARNTL2, ASH1L, ASXL2, ATAD2, ATAD2B, ATF1, ATF2, ATF7, ATM, ATMIN, ATXN1L, BACH1, BAZ1B, BAZ2B, BCL9, BCLAF1, BCLAF3, BCOR, BEND3, BMPR1B, BPTF, BRD2, BRMS1L, BRWD1, CARF, CBFB, CCNC, CCNT1, CCNT2, CDC73, CDK1, CDK8, CDKN2AIP, CEBPG, CEBPZ, CHD1, CHERP, COPS2, CREB1, CREBZF, CRLF3, CSRNP3, CSTF2T, CTBP2, DACH1, DB…
GO:0006357	regulation of transcription by RNA polymerase II	GO_BiologicalProcess-EBI-UniProt-GOA-ACAP-ARAP_13.05.2021_00h00	1.26852e-18	6.01973e-18	Group4	25.425425	508	[ACVR2B, ADNP, ADNP2, AEBP2, AGO1, AGO4, AHI1, AKIRIN1, ALX1, ARF4, ARID4A, ARID4B, ARNTL2, ASH1L, ASXL2, ATAD2, ATAD2B, ATF1, ATF2, ATF7, ATM, ATMIN, ATXN1L, BACH1, BAZ1B, BAZ2B, BCL9, BCLAF1, BCLAF3, BCOR, BEND3, BMPR1B, BPTF, BRD2, BRMS1L, BRWD1, CARF, CBFB, CCNC, CCNT1, CCNT2, CDC73, CDK1, CDK8, CDKN2AIP, CEBPG, CEBPZ, CHD1, CHERP, COPS2, CREB1, CREBZF, CRLF3, CSRNP3, CTBP2, DACH1, DBX2, DEK,…
GO:0140110	transcription regulator activity	GO_BiologicalProcess-EBI-UniProt-GOA-ACAP-ARAP_13.05.2021_00h00	1.77542e-16	6.01973e-18	Group4	25.637981	432	[ADCY1, ADNP, ADNP2, AEBP2, AIM2, AKIRIN1, ALK, ALX1, ARNTL2, ATF1, ATF2, ATF7, ATMIN, BACH1, BCL10, BCL9, BCLAF1, BCLAF3, BCOR, BEND6, BIRC2, BRMS1L, C1D, CARD8, CARF, CASP8AP2, CBFB, CDKN2AIP, CEBPG, CEBPZ, CHERP, CHORDC1, CNOT6, COPS2, CREB1, CREBZF, CSRNP3, CTBP2, DACH1, DBX2, DMRTA2, DMTF1, DNMT3B, DYRK1A, E2F3, E2F5, E2F6, E2F8, EAF1, EBF2, EGLN1, EID2B, ELF2, ENY2, ERBIN, ETV1, FGF13, FOXB…
GO:0003700	DNA-binding transcription factor activity	GO_BiologicalProcess-EBI-UniProt-GOA-ACAP-ARAP_13.05.2021_00h00	1.10093e-14	6.01973e-18	Group4	26.450115	342	[ADCY1, ADNP, ADNP2, AEBP2, AIM2, ALK, ALX1, ARNTL2, ATF1, ATF2, ATF7, ATMIN, BACH1, BCL10, BRMS1L, CARD8, CARF, CDKN2AIP, CEBPG, CHORDC1, CREB1, CREBZF, CSRNP3, DACH1, DBX2, DMRTA2, DMTF1, E2F3, E2F5, E2F6, E2F8, EBF2, EGLN1, ELF2, ERBIN, ETV1, FOXB1, FOXJ2, FOXN2, FOXN3, FZD1, G3BP2, GABPA, GLI3, GTF2IRD2, GTF2IRD2B, HDAC4, HEY1, HIC2, HIPK2, HIVEP2, HMGA2, HOXA5, HOXB3, IKZF5, IRX5, JAK2, KCNH…

## Sheet: Table S1c. ASDvsCtrl Tr.Up
ASD vs Control BA19 Translation Up
Characteristics of the Network
p-val cutoff : 0,01
Correction Meth, : Benjamini-Hochberg
Kappa Score Threshold: 0,4
Grouped by Kappa Statistics
Statistical Test Useed: Enrichment (Right-sided hypergeometric test)
Min GO Level : 7 , Max GO Level : 15 (default)
Number of genes : 3 (default)
Min, Percentage: 10 (default)
Organism Analyzed:Homo Sapiens
Ontology Used: GO_BiologicalProcess-EBI-UniProt-GOA-ACAP-ARAP_13,05,2021_00h00 KEGG_13,05,2021 REACTOME_Reactions_13,05,2021
Characteristics of the Gene Lists
Reference Set Consists of 11998 genes
Consists of 627 genes of which 625 were recognized by ClueGO,
500 out of 625 genes (80%) functionally annotated in any selected ontology
Term ID	Term	Ontology Source	Term PValue Corrected with Benjamini-Hochberg	Group PValue Corrected with Benjamini-Hochberg	GOGroups	% Associated Genes	Nr. Genes	Associated Genes Found
R-HSA:5674130	MAP2Ks and MAPKs are phosphorylated at the endosome membrane	REACTOME_Reactions_13,05,2021	0.00921659	0.000512033	Group0	40	4	[LAMTOR2, MAP2K2, MAPK3, WDR83]
R-HSA:5674132	WDR83:LAMTOR2:LAMTOR3 binds MAPK components	REACTOME_Reactions_13,05,2021	0.00921659	0.000512033	Group0	40	4	[LAMTOR2, MAP2K2, MAPK3, WDR83]
GO:0006119	oxidative phosphorylation	GO_BiologicalProcess-EBI-UniProt-GOA-ACAP-ARAP_13,05,2021_00h00	0.000324079	7.20175e-06	Group1	14.5161	18	[ATP5MC1, COX5B, COX6B1, COX6C, COX7A2L, DGUOK, DMAC2L, DNAJC30, FAM3A, NDUFA1, NDUFA11, NDUFA13, NDUFB11, NDUFB8, NDUFS6, PPIF, TAZ, UQCR10]
GO:0019646	aerobic electron transport chain	GO_BiologicalProcess-EBI-UniProt-GOA-ACAP-ARAP_13,05,2021_00h00	0.00224084	7.20175e-06	Group1	15.5844	12	[COX5B, COX6B1, COX6C, COX7A2L, FAM3A, NDUFA1, NDUFA11, NDUFA13, NDUFB11, NDUFB8, NDUFS6, UQCR10]
GO:0042773	ATP synthesis coupled electron transport	GO_BiologicalProcess-EBI-UniProt-GOA-ACAP-ARAP_13,05,2021_00h00	0.000446464	7.20175e-06	Group1	16.4706	14	[COX5B, COX6B1, COX6C, COX7A2L, DGUOK, FAM3A, NDUFA1, NDUFA11, NDUFA13, NDUFB11, NDUFB8, NDUFS6, TAZ, UQCR10]
GO:0042775	mitochondrial ATP synthesis coupled electron transport	GO_BiologicalProcess-EBI-UniProt-GOA-ACAP-ARAP_13,05,2021_00h00	0.000446464	7.20175e-06	Group1	16.4706	14	[COX5B, COX6B1, COX6C, COX7A2L, DGUOK, FAM3A, NDUFA1, NDUFA11, NDUFA13, NDUFB11, NDUFB8, NDUFS6, TAZ, UQCR10]

## Sheet: Table S1d. ASDvsCtrl Tr.Down
ASD vs Control BA19 Translation Down
Characteristics of the Network
p-val cutoff : 0,01
Correction Meth, : Benjamini-Hochberg
Kappa Score Threshold: 0,4
Grouped by Kappa Statistics
Statistical Test Useed: Enrichment (Right-sided hypergeometric test)
Min GO Level : 7 , Max GO Level : 15 (default)
Number of genes : 3 (default)
Min, Percentage: 10 (default)
Organism Analyzed:Homo Sapiens
Ontology Used: GO_BiologicalProcess-EBI-UniProt-GOA-ACAP-ARAP_13,05,2021_00h00 KEGG_13,05,2021 REACTOME_Reactions_13,05,2021
Characteristics of the Gene Lists
Reference Set Consists of 11998 genes
Consists of 627 genes of which 625 were recognized by ClueGO,
500 out of 625 genes (80%) functionally annotated in any selected ontology
Term ID	Term	Ontology Source	Term PValue Corrected with Benjamini-Hochberg	Group PValue Corrected with Benjamini-Hochberg	GOGroups	% Associated Genes	Nr. Genes	Associated Genes Found
R-HSA:9014342	K63-linked ubiquitination of RIP1 bound to the activated TLR complex	REACTOME_Reactions_13.05.2021	0.00946713	1.59729e-05	Group0	25.0	3	[RIPK1, TRAF6, UBE2V1]
GO:0031664	regulation of lipopolysaccharide-mediated signaling pathway	GO_BiologicalProcess-EBI-UniProt-GOA-ACAP-ARAP_13.05.2021_00h00	0.00946713	1.59729e-05	Group0	25.0	3	[TNFAIP3, TRAF6, TRIM5]
GO:1904996	positive regulation of leukocyte adhesion to vascular endothelial cell	GO_BiologicalProcess-EBI-UniProt-GOA-ACAP-ARAP_13.05.2021_00h00	0.00865785	1.59729e-05	Group0	27.272728	3	[FUT4, NFAT5, TRAF6]
GO:0043631	RNA polyadenylation	GO_BiologicalProcess-EBI-UniProt-GOA-ACAP-ARAP_13.05.2021_00h00	0.00987506	0.00432689	Group1	10.416667	5	[CDC73, CPEB1, NCBP1, PAPOLG, SCAF8]
GO:0006378	mRNA polyadenylation	GO_BiologicalProcess-EBI-UniProt-GOA-ACAP-ARAP_13.05.2021_00h00	0.00990225	0.00432689	Group1	10.638298	5	[CDC73, CPEB1, NCBP1, PAPOLG, SCAF8]
GO:0031442	positive regulation of mRNA 3'-end processing	GO_BiologicalProcess-EBI-UniProt-GOA-ACAP-ARAP_13.05.2021_00h00	0.00865785	0.00432689	Group1	27.272728	3	[CDC73, CPEB1, NCBP1]
R-HSA:1011598	DOCKs bind to RhoGEFs	REACTOME_Reactions_13.05.2021	0.00946713	0.00377716	Group2	25.0	3	[DOCK10, DOCK4, DOCK5]
GO:0045906	negative regulation of vasoconstriction	GO_BiologicalProcess-EBI-UniProt-GOA-ACAP-ARAP_13.05.2021_00h00	0.00284285	0.00377716	Group2	50.0	3	[ARHGAP42, DOCK4, DOCK5]
GO:0045986	negative regulation of smooth muscle contraction	GO_BiologicalProcess-EBI-UniProt-GOA-ACAP-ARAP_13.05.2021_00h00	0.00799787	0.00377716	Group2	30.0	3	[ARHGAP42, DOCK4, DOCK5]
GO:1904694	negative regulation of vascular associated smooth muscle contraction	GO_BiologicalProcess-EBI-UniProt-GOA-ACAP-ARAP_13.05.2021_00h00	0.00029837	0.00377716	Group2	100.0	3	[ARHGAP42, DOCK4, DOCK5]
GO:0003056	regulation of vascular associated smooth muscle contraction	GO_BiologicalProcess-EBI-UniProt-GOA-ACAP-ARAP_13.05.2021_00h00	0.00326373	0.00377716	Group2	42.857143	3	[ARHGAP42, DOCK4, DOCK5]
